# Supplementary material for: Multiplexed mRNA assembly into ribonucleoprotein particles plays an operon-like role in the control of yeast cell physiology
Source: bioRxiv preprint, doi:10.1101/2020.06.28.175851, version 1 (2020-06-28)
Supplement: Supplementary Table S1 [file 175851_file02.xlsx]

## Sheet: Counts.matrix
	OXA1	PEX14	ASH1	Cntrl	MYO4	ATG8	ABP1	MYO2	SRO7	OM45	EXO70
CUS2:YNL286W	7.10761	29	37	16	12	14	13	11	13	9	7
PRD1:YCL057W	134.052	302	382.859	345.381	143.748	122	130	167.83	97.7243	137	107
UBP10:YNL186W	66	157	122	79	91	67	38	83	32	76	63
PET9:YBL030C	281	783	688	723	303	362	281	325	287	356	210
LYS5:YGL154C	21	54	55	42	14.3741	9	11	11	15	13	17
RMD8:YFR048W	23	77	108	82	36	38	24	29	24	51	21
SHE10:YGL228W	91.5729	258	286.417	254.613	107.457	146.356	91.4809	95.9698	59.2706	91.0393	56.7146
NOP16:YER002W	6	20	28	16	12	22	17	34	11	21	24
RPB7:YDR404C	20	59	61	90	16	12	22	29	19	22	13
MEO1:YBR126W-A	2.50743	22.4921	0	6.9431	4.6123	2.33152	0	2.66726	2.06475	4.7461	6.80363
ATP4:YPL078C	63	176	239	246	61	71	66	87	90	80	77
ATP11:YNL315C	30	48	74	53	29	23	24	30	31	33	20
PPM1:YDR435C	29	83	65	98	19	24	18	24	26	38	15
APT2:YDR441C	17	16	23	14	5	12	12	15	6	12	15
MFA1:YDR461W	48	121	171	81	48	98	45	91	1	0	0
YPR098C	23	42	42	60	24	14	15	13	15	18	22
YAL069W	0	0	0	0	0	0	0	0	0	0	0
DAT1:YML113W	7	13	20	6	9	7	7	3	3	3	7
YLR031W	2	7	15	14	5	1	0	1	5	1	5
YIL014C-A	8	5	9	7	1	0	2	2	0	1	1
RPP1B:YDL130W	108	158	164	193	216	112	149	270	102	154	262
FLO10:YKR102W	51	139	146	96	48	86	24	47	41	59	17
BRL1:YHR036W	18	38	58	49	11	8	9	17	14	7	7
YGR053C	5	27	35	26	7	9	8	6	6	6	9
NIT1:YIL164C	146.293	251.961	402.522	335.074	33	39	19	31.4761	73	22	19.5703
HOM2:YDR158W	380	937	822.989	984	245	220	111	298	272	180	286
TEP1:YNL128W	4	12	16	15	2	3	1	5	4	1	5
TAF10:YDR167W	17	49	60	34	16	3	9	20	11	19	8
YCR101C	12	67	45	51	21	26	18	16	26	25	6
BOS1:YLR078C	16	43	42	53	12	7	7	17	8	13	14
DOC1:YGL240W	7	35	28	30.4076	7	10	5	11	7	11	7
SDS23:YGL056C	30	146	129	100	40	37	31	64	24	51	39
AI2:Q0055	1094.34	1404.83	1775.52	1630.52	1083.79	1471.54	1252.41	1050.33	1537.14	1646.61	1018.12
HXT16:YJR158W	0	0	0	0	0	0	0	0	0	0	0
REG2:YBR050C	11.1095	50.4545	22.0768	37.1437	10.0551	19.1216	6.592	12.7598	13.767	24.2178	6
MCD1:YDL003W	69	91	141	69	46	29	19	39	23	30	29
RTC6:YPL183W-A	7	21	16	20	9	14	3	9	11	9	9
ENV10:YLR065C	14	45.6126	71	59	14	12	32	32.8355	11	19	25
SIN3:YOL004W	317	1275	886	894	412	435	218	432	297	470	225
RPB8:YOR224C	11	20	16	23	13	5	8	29	20	18	30
SNF4:YGL115W	32	123	111	137	34	18	25	49	46	47	42
YKR011C	33	108	109	111	28	44	36	44	43	49	29
MBB1:YJL199C	7	42	28	49	15	8	6	11	3	11	3
tV(AAC)M1	0	0	0	0	0	0	0	1	0	1	0
RPO41:YFL036W	189	532	386	467	197	220	141	240	139	292	141
YOR024W	0	0	0	0	0	0	0	0	0	1.22287	0
MUM2:YBR057C	32	69	94	74	23	28	17	32	20	30	19
YEL008C-A	0.583081	0	2.27364	0	0.584303	1	0	0.613596	0	0.764213	0
EMI2:YDR516C	362	1307	785	1315	406	529	439	334	264	592	194
MPC1:YGL080W	5	46	56	56	16	9	15	24	17	20	15
MTL1:YGR023W	61.2484	310.591	111.911	142.921	38.4862	93.3294	59.3435	76.723	58.9947	87.7775	29.1187
PTC6:YCR079W	61	131	101	117	39	62	46	35	35	50	27
SEC11:YIR022W	37	43	59	58	28	15	20	24	24	28	29
RPC82:YPR190C	19	38	32	34	29	11	16	43.4335	13	31	34
GIP3:YPL137C	172.173	601.314	514.915	403.788	218.103	163.801	104.941	291.838	151.883	232.703	159.629
GSH2:YOL049W	49	187	186	189	66	53	72.5972	82	53	79	51
PIM1:YBL022C	182	680	578	529	273	276	202	306	219	335	130
JID1:YPR061C	10	42	37	55	7	13	27	17	10	21	8
MES1:YGR264C	67.2622	226.57	220.425	233.148	170.209	105.253	94.3591	223.915	123.017	166.899	142.626
SPC2:YML055W	10	29	22	29	13	7	13	15	9	8	12
SOR1:YJR159W	2	9	0	8	3	6.5	0	6	2	18	7
EXG2:YDR261C	52	252	365	235	57	31	45	78	76	57	60
YDR261W-A	58.2036	60.0668	43.7994	7.3222	8.92152	9.93436	0.00230818	39.4744	14.9428	17.1248	38.5255
GPI1:YGR216C	22	43	62	79	24	14	18	22	16	24	25
YDR134C	109.036	740.647	632.079	667.701	126.32	100.054	203.802	172.742	78.9452	179.2	130.107
CSE2:YNR010W	5	8	8	11	3	2	5	7	2	2	0
GAT2:YMR136W	22	182	107	90	38	32	43	53	25	79	21
LIA1:YJR070C	29	18	28	14	44	31	28	57	16	24	59
YHL019W-A	7.91743	26.1797	10.5722	11.4133	0	1.88836	0	0.215276	0	0	1.48932
SHE2:YKL130C	19	39	33	42	20	13	9	16	8	14	13
ABZ2:YMR289W	15	71	92	51	18	28	14	23	27	17	9
YHR180W-A	0	0	2	0	0	0	0	0	0	0	0
YCR061W	129	428	408	309	115	136	81	119	111	202	51
YBR206W	13.9666	20.9916	14.9511	7.72893	2.37989	5.47142	7.38175	10.9954	2.95665	13.3686	12.0465
ITR1:YDR497C	216	959	1160	944	720	321	315	694	1008	533	540
RSA3:YLR221C	8	15	13	9	6	9	12	16	3	9	10
NSE5:YML023C	23	51	65	76	14	10	13	26	16	15	13
YLR154C-H	0.00981945	171.864	177.531	61.367	1.23205	0.0864464	0.0287126	0.000284597	1.17467	139.083	2.04653
SWA2:YDR320C	35	97	75	97	29	29	21	41	21	42	23
YPL119C-A	8	18	10	23	5	8	5	8	0	9	5
NUP116:YMR047C	158	514	503	445	209	178	113	178	133	223	153
ALG12:YNR030W	32	82	100	79	28	19	39	39	25	29	21
YBR292C	4	8	15	4	1	2	1	2	2	1	2
MIG1:YGL035C	81	207	197	162	119	128	64	146	62	113	83
RPL28:YGL103W	143.377	338.598	258.804	278.408	331.187	173.069	203.862	418.748	144.964	193.117	484.495
JSN1:YJR091C	192	814	573	603	224	227	166	278	190	340	154
YSF3:YNL138W-A	3	6	13	10	7	3	1	3	3	5	2
DAD3:YBR233W-A	6	6	7	5	7	4	2	5	1	1	2
YBR063C	17.2926	57.0244	61.2968	68	21.8232	14.1779	11	24.1039	14.4886	28.5365	19
MPH3:YJR160C	28	48.8876	31.3402	16.0065	21.5836	35.2896	10.7675	13.4474	36	19.3265	12.3057
TAF11:YML015C	4	18	35	26	16	3	3	16	3	10	6
YHR095W	0	3	0	1	2	0	1	2	2	0	1
COQ9:YLR201C	38	71	93	91	16	34.874	19	25	24	30	22
TAH11:YJR046W	39	75	107	106	76	39	26	43	56	46	53
tI(AAU)E1	2	3	0	0	1	0	0	0	0	1	0
SMC1:YFL008W	114	184	279	185	101	90	63	104	69	96	54
NOP53:YPL146C	12	25	24	15	17	13	16	22	10	15	26
SHM2:YLR058C	948	1674	3220	2397	546	405	137	562	432	260	466
WHI5:YOR083W	25	77	76	52	46	41.793	26	42	16	29	21
YGR266W	75	161	177	200	83	64	53	87	57	79	60
CDC40:YDR364C	23	57	40	65	14	21	9	22	12	11	14
MUP3:YHL036W	211	754	851	574	228	142	79	214	233	233	96
YPR084W	18	63	62	52	19	15	14	29	7	30	14
VPS38:YLR360W	32	83	91.0637	82.5197	18.4362	19	14	24.9459	26	25.5939	14
YBR184W	1	7	7	15	3	2	1	5	4	3	3
MER1:YNL210W	4	12	16	16	4	1	0	8	1	4	5
GPA1:YHR005C	68	183	265	178	37	54	37	67	29	49	46
HXT11:YOL156W	15	33.0909	46.0976	39.5581	18.5714	10.1818	10.6364	19.0476	16.1538	12	11.1765
BUD13:YGL174W	12	20	20	15	4	4	4	5	6	12	6
ILM1:YJR118C	11	16	35	36	12	10	13	20	8	9	12
YGR035C	8	16	17	6	5	2	9	7	6	7	13
KNH1:YDL049C	2	3	13	12	4	5	2	8	11	4	10
RPB4:YJL140W	35	100	133.796	83	64	43	46	64	28	55	38
MFT1:YML062C	19	80	79	35	21	32	20	34	21	20	12
YGR190C	10.5681	43.9998	25.673	32.2373	3.14207	6.70218	5.45754	16.5409	1.19496	8.45541	11.4758
YFR018C	33	90	98	68	39	28	29	56	28	22	39
PUP3:YER094C	63	184	198	211	75	75	86	98	71	93	68
ACS1:YAL054C	117	205	109	188	52	45	41	59	11	81	25
TOA2:YKL058W	22	36	41	57	13	17	14	23	13	14	16
YKL183C-A	0	1	18	3	1	0	0	2	0	0	1
CDC14:YFR028C	19	70	118	81	31	26	22	42	18	33	31
tV(AAC)G1	0	0	1.33333	0	1	0	1	0	2	1	0
YNL134C	198	364	462	339	177	174	118	165	227	188	144
SNR71:snR71	9	11	5	3	5	23	7	3	3	18.9434	9.95142
YOR192C-B	1177.58	1399.96	985.694	1209.46	717.466	546.98	282.323	1718.3	500.131	518.207	1377.93
MRP20:YDR405W	34	87	68	55	33	38	22	33	26	41	22
SNR61:snR61	75	111	34	17	34	69	64	38	22	65	65
YLR299C-A	0	0	0	0	0	0	0	0	0	0	0
BAG7:YOR134W	36	31	45	41	17	25	13	6	12	9	9
YNL228W	5.03451	13.3778	7.67686	0.562499	4.02316	0	5.28944	7.59018	0.923032	0	3.707
NST1:YNL091W	122	561	453	350	183	232	111	206	140	225	114
PAU2:YEL049W	0	2.05876	10.1277	11.9506	2	0	0	3	2.28571	4.5	2
XBP1:YIL101C	86	307	108	168	58	108	61	55	37	119	37
ERV1:YGR029W	28	36	56	49	9	8	18	19	12	18	15
YAL068W-A	0	0	0	0	0	0	0	0	0	0	0
YML020W	36	136	109	101	40	35	20	45	23	48	13
SRP102:YKL154W	13	20	35	31	15	13	8	13	9	4	10
CMC4:YMR194C-B	10	18	13	19.0077	10	3.00091	13	10.0007	1.00019	5	6
FUN30:YAL019W	54	111	115	70	52	43	31	92	36	56	67
NGL1:YOL042W	11	38	40	59	14	8	9	18	18	11	13
BLM10:YFL007W	281	689	679	761	292	384	243	424	148	426	197
YOL035C	6.78795	20.1146	20.0553	8.45737	2.9253	5.78699	0	6.57534	5.58486	7.29363	6.98299
tN(GUU)N1	1	1	0	1	0	0	0	1	0	0	0
PHO84:YML123C	27	164	92	212	76	40	39	84	53	68	107
VPS30:YPL120W	14	43	28	40	16	16	9	14	15	14	14
YLR434C	0	1.20621	4.93679	1	0	0	0	1.15371	0	1	1
YPQ2:YDR352W	16	52	54	68	15	14	11	30	22	29	31
TKL1:YPR074C	453	914	1337	1217	833	508	389	919	683	724	723
tV(CAC)H	1	1	0	0	0	0	0	0	0	0	1
POR1:YNL055C	325	739	795	805	279	285	214	251	328	420	207
YMR242W-A	0	0	0	0	0	0	0	1	0	0	0
TMN2:YDR107C	27	90	123	131	30	27	43	26	32	36	21
ZTA1:YBR046C	58	144	134	130	44	48	36	45	46	53	30
KTI11:YBL071W-A	2	8	3	3	2	2	7	3	1	0	7
GCD10:YNL062C	10.3287	22	14	18	13	5	12	27	13	18	23
HMS2:YJR147W	45.5992	115.661	90.4087	71.7784	33.4935	30	24.1939	54	27.5875	42.4938	37.6539
RPN11:YFR004W	84	233	202	221	71	70	65	90	70	116	52
TPM1:YNL079C	132	350	379	240	193	283	124	177	116	169	90
YMR315W	145	372	420	510	108	109	99	132	112	118	89
CDC9:YDL164C	54	103	142.903	86	55.8091	56	38	68	26.8568	47	31.6932
YKL202W	44.4279	176.624	120.158	83.2705	60.1261	84.6717	23.2016	26.0507	28.8836	38.815	3.04853
DBF20:YPR111W	26	79	82	86	25	14	3	18	14	17	8
YIP5:YGL161C	44	144	136	126	36	51	36	48	37	43	30
tS(GCU)Q1	0	0	0	0	0	0	0	0	0	0	0
SNR41:snR41	468	537	475	135.228	645	554	375	490	283	636	777.278
tL(CAA)L	0	2	2.8	1	1.25	0	0.4	0	0	0	0.3
YDR396W	0	5.13998	12.5081	5.34794	0	1.89798	3.19835	0	2	0	7.29632
YGR115C	17.2055	30.9809	34.262	3.9038	40.3814	67.9565	10.2068	2.43805	10.3173	2.80172	10.5814
SPT15:YER148W	52.113	52.9491	66.5459	53.6918	27.7147	13.0663	20.3437	32.2438	19.258	23.7883	15.4457
RPB10:YOR210W	12	20	35	35	11	11	21	14	11	10	22
GCR1:YPL075W	77	207	320	159	70	65	41	111	71	69	51
PEP4:YPL154C	683	1152	1417	1434	552	517	306	439	250	493	343
GDH3:YAL062W	38	98	136	95	30	43	21	44	16	31	23
YBL062W	0	8.64563	4.07468	15.1368	0	0	0.563915	0.415897	1.47038	0	3.29249
PBI1:YPL272C	26	28	54	47	9	6	6	13	8	15	4
RPS27A:YKL156W	10.4326	45.9704	42.3815	31.9129	24.4265	16.1198	18.3635	64.6509	18.4219	14.5149	56.7464
YRA1:YDR381W	88	294	285	272	148	146	85	156	137	125	106
TPO2:YGR138C	85.7983	113.589	335.837	97.4312	79.402	41.3884	46.3016	117.869	91.9672	60.9699	106.022
DLT1:YMR126C	22	27	23	52	13	11	6	14	11	14	9
PDR17:YNL264C	14	59	85	77	26	34	26	35	22	35	31
TEL2:YGR099W	33	104	159	115	28	21	29	42	29	25	29
ALD5:YER073W	102	337	289	369	101	43	25	111	91	38	127
IRC6:YFR043C	6	22	15	16.4413	8	4	3	2	6	8	3.32753
GOR1:YNL274C	120	181	289	238	49	63	43	53	91	50	23
HAA1:YPR008W	89	348	268	252	108	146	87	109	101	154	78
RPL2A:YFR031C-A	81.2256	206.564	163.365	194.837	240.247	110.182	134.538	225.521	98.4	187.346	381.331
YHR097C	101	392	254	274	103	168	98	96	104	161	51
GDI1:YER136W	77	272	291	379	63	79	71	138	97	127	82
AVT4:YNL101W	94	243	282	287	72	54	60	96	140	95	62
TPS2:YDR074W	1126	4272	2476	3955	1147	2027	1073	1146	756	1855	522
BUL2:YML111W	38	113	152	96	45	49	29	46	39	48	42
SPS22:YCL048W	0	5	5	5	1	2	1	2	1	1	0
ECM5:YMR176W	90	242	277	241	33	77	37	81	71	92	54
AKR2:YOR034C	51	118	147	138	42	50	36	75	55	46	35
HHT1:YBR010W	73	348.702	298.343	365.361	179.749	73	108	163.365	59	186	150
HXT14:YNL318C	2	0	2.64091	0	0	0	0	0	0	1	0
RRT2:YBR246W	30	60	96	110	24	19	19	37	23	22	23
SNR72:snR72	23	14	12	4	16	40	21	18	11	25	23
SEC39:YLR440C	20	63	92	79	26	21	27	57	27	31	30
HHY1:YEL059W	1	4	7.62483	8	1	1.12478	5	2	5	0	1
BIK1:YCL029C	9	44	38	29	17	13	6	18	9	10	13
CCT5:YJR064W	98	150	200	175	106	50	56	122	62	90	93
NUP2:YLR335W	54	158	153	139	78	68	56	91	58	82	55
tT(UAG)Q2	3	0	0	0	0	0	0	0	0	0	0
OPI6:YDL096C	4.63508e-07	0	4.67928	2.97517	0	0	0	8.54941	0	0	8.82134
OAZ1:YPL052W	5	17	15	25	6	2	1	11	8	2	8
YGL199C	3.90182	13.4169	0	7.17568	0	0	0	0	5.92325	0	4.43997
YDR010C	2	5	1	6	3	1	3	1	1	2	2
YBL059W	3	8	12	6	3	3	3	6	3	3	3
SNR83:snR83	1715	3849	2945	1855	2504	1884	1657	2980	5034	2767	3075
ILV5:YLR355C	469	1091	1118	868	569	479	218	629	278	353	652
ULA1:YPL003W	64	152	166	162	46	66	45	55	51	66	27
YFL012W	1	3	0	2	0	0	0	0	0	0	0
YDR262W	83	161	130	134	35	43	56	54	51	70	34
SHP1:YBL058W	92	274	275.814	306	94	115	74	124	91	142	72.675
YOR108C-A	5.93048	1.66047	0	4.61949	0	0	0.553956	0	2.60509	1.02838	0
YKL153W	486.451	476.391	1001.6	1004.37	403.892	223.717	366.853	551.262	406.664	375.442	600.104
SNR69:snR69	80	96	88	37	72	120	101	78	84	106	94
YDR467C	5.3244	15.4489	10.1786	13.2456	3.31023	6.6844	0	5.94376	3.39255	8.6905	1
IWR1:YDL115C	44	128.685	90.7016	97	31	34	30.5792	28	18.3452	33	14
BRP1:YGL007W	2	2	5	4	2	0	0	3	4	3	3
KAR4:YCL055W	21	42	68	55	12	16	22	26	7	14	14
YOR200W	2.82638	7.98629	0	8.60168	3.18094	2.78425	4.15036	7.11877	0	0.364994	0
MFB1:YDR219C	34	113	116	119	20	28	30	33	31	34	29
CAP1:YKL007W	42	104	134.772	146	50	29	32	39	36	37	28.6419
PMT5:YDL093W	39	73.7397	151.024	108.725	27	20	21	43.7492	25	34	27.6082
ECM21:YBL101C	200	596	508	489	145	185	111	186	116	184	89
ISU1:YPL135W	90.3314	387	253	364	85	49	49	90	64	94	67
YPR127W	61	76	93	114	20	58	28	32	27	29	24
PAI3:YMR174C	9.58234	25	14	15.1766	3	10.5681	5	4	6.38301	10	4
VPS9:YML097C	11	37	48	37	13	3	11	19	13	9	5
OST3:YOR085W	62	204	205	197	82	62	50	98	62	95	51
FAA4:YMR246W	99	229	253	182	189	72	72	219	79	131	148
HOP2:YGL033W	1	2	4	2	0	0	0	0	0	0	0
GIN4:YDR507C	120	261	380	230	81	82	34	99	74	87	67
YHR125W	0	0	0	1	0	0	0	0	0	0	0
YER119C-A	5.52357	3.87387	7.38664	3.53306	0	1.64917	0	0	1.21679	1.09791	0
SNR84:snR84	1566	1871	1706	1217	1611	2585	1213	1567	3072	2139	1476
tD(GUC)L1	0	0	0	0	0	0	0	0	0	0	0
TIM12:YBR091C	3	17	19	14	11	3	0	10	5	7	5
YDR034C-C	41.1817	114.701	117.171	55.1869	35.124	8.32953	30.4983	50.629	18.6074	41.9021	50.4938
KTR7:YIL085C	52	138	170.892	142.906	47	37	41	54	39	59	39
CPR5:YDR304C	63	113	166	136	47	58	47	72	44	52	63
YNL319W	1	1	1.35909	3	0	1	0	0	0	0	0
YBR113W	3.58514	43.4825	43.2262	23.0231	13.599	13.0673	8.74442	15.5561	14.4093	5.56685	10.6269
OTU2:YHL013C	11	17	16	12	15	10	13	18	6	12	10
MPH1:YIR002C	55	146	133	111	52	47	43	55	34	65	41
YJL043W	4	6	7	4	1	2	0	1	3	0	2
CLN1:YMR199W	38	170	210	105	39	29	19	61	35	47	40
HPM1:YIL110W	6	19	24	28	19	15	11	17	12	14	17
MRPL50:YNR022C	10	17	22	20	17	9	5	15	6	10	10
FPK1:YNR047W	123	568	449	474	182	215	136	207	138	210	95
FEX1:YOR390W	26.6	21.2903	58.9474	50.2273	9.5	0	8	26.6667	10.8	22.6667	19.4444
SNF12:YNR023W	24	67	78	61	24	16	13	22	25	16	20
RRD1:YIL153W	66	135	127	117	40	48	34	44	44	49	37
SSN2:YDR443C	75.379	208.456	201.545	186.412	58.1403	87.1184	46.308	97.7657	45.3226	77.5225	57
YHR218W	60.7734	11.7959	84.2411	0.0023534	0.937887	81.1627	20.713	3.63032	54.4772	48.1119	16.223
MRS1:YIR021W	13	31.566	53	42	15	9	9	13.8411	11	16	11
RGP1:YDR137W	42	92	113.632	110	40.6843	34	34	44.916	37	50.9242	31.8831
tG(GCC)P2	0	3	0	0	0	0	6	2	0	0	2.33333
YBL006W-A	0	0	0	0	0.0904552	0	0	0	0	0	0
ERV29:YGR284C	28	64	90	105	30	17	26	38	31	38	34
VHS3:YOR054C	128.531	670.796	379.9	322.075	123.586	199.086	71.9834	96.9862	140.903	179.155	39.4004
YOL166C	0	2	3	0	1	0	1	0	0	0	1
CAF120:YNL278W	65	215	167	118	102	48	25	113	58	93	74
IPI1:YHR085W	18	17	15	16	4	3	6	12	2	7	5
SKY1:YMR216C	109	413	433	361	143	141	85	168	127	144	95
RIX1:YHR197W	9	25	11	12	25	18	31	34	17	27	34
ASP3-4:YLR160C	114.25	165.5	197	204.25	87	59.5	76	147.5	88.25	83.25	134.75
TRM13:YOL125W	12	35	38	30	12	16	18	19	3	14	18
KTI12:YKL110C	12	15	41	35	15	7	11	17	5	8	13
FSH2:YMR222C	20	36	47	66	11	12	14	18	14	20	20
TPM2:YIL138C	19	49	101	49	30	37	16	37	24	39	28
HHO1:YPL127C	45	142	208	154	79	69	41	70	53	55	51
IRC4:YDR540C	3	8	9	12	4	4	5	1	5	3	2
YMR178W	22	82	91	85	36	11	55	36	31	24	34
GEF1:YJR040W	58	195	235	180	66	57	42	65	63	64	37
SDD2:YMR074C	20	47	78	62	10	14	23	30	16	33	32
ADF1:YCL058W-A	3	2.38643	3	0	2	0	2	5	2	0	4
VIK1:YPL253C	8	43	65	38	22	10	9	17	10	11	18
YGL015C	0	2	1	0	0	0	0	0	0	0	0
ATG38:YLR211C	11	39	25	22	7	12	6	5	11	6	6
ATP2:YJR121W	609	1326	1224	1514	623	679.994	509	532	635	732	403
YOR342C	31	52	56	38	24	25	24	38	10	34	23
MHR1:YDR296W	48	88	92	63	35	39	34	30	29	37	21
RIC1:YLR039C	29	106	114	115	47	35	26	58	34	44	30
YLR124W	5	19	15	22	3	6	6	3	3	10	2
PRE3:YJL001W	80	157	201	179	55	20	53	57	63	68	53
AQY2:YLL052C	6	2	3.16092	3	3	1	0	6	4	5	2
PMI40:YER003C	70	138	281	181	131	54	76	129	72	131	131
RPS23B:YPR132W	98	196	137.772	156.468	208	118.624	143	255.569	81.54	148	235
YPR202W	89.1024	146.996	233.184	157.678	60.0908	80.1318	30.0595	95.795	61.0572	60.23	65.4074
YPL107W	16	29	38	24	8	11	5	12	10	13	7
NDD1:YOR372C	54	233.395	171	167	65	68	37.1454	85	32	76	41
YHR173C	0	1.11231	13	10	3	1	0	2	0	1	4
YHR073W-A	0	0	0	0	0	0.482251	0	0	0	0	0
SUP2:tY(GUA)D	0	5.39333	7.41392	1.98129	2	0	0	0	2	2	1.33333
YPR097W	71	175	162	165	61	71	52	73	47	73	54
YBR201C-A	2	9	3	6	2	3	2	2	0	2	5
SET6:YPL165C	25.6028	58.5087	52.4382	92.555	16.4217	17.424	18.6137	14	21.4068	25	8
CYM1:YDR430C	66	177	177	165	86	69	56	98	98	94	60
LSM3:YLR438C-A	24	32	35	32	7	11	16	17	6	12	11
FIT1:YDR534C	33	56	39	44	11	17	17	19	11	22	8
IZH1:YDR492W	5	38.7494	37	30	14	5	7	22.8359	11	15	29.8202
UBP16:YPL072W	6	13.606	11.3995	25.3061	4.33416	4	0	14.6999	11.7192	15.4674	9.94778
RAD1:YPL022W	147	313	377	337	116	121	60	129	83	140	75
MFG1:YDL233W	22	86	59	69	25	27	20	37	37	33	20
YLR256W-A	1327.92	1666.89	1603.82	1131.51	1036.38	603.328	517.167	1703.02	149.286	675.32	1225.23
BGL2:YGR282C	371	833	1009	997	413	439	299	484	324	357	413
15S_RRNA:Q0020	1812.99	1138	3339.98	2644.99	2123.95	1974	3087.99	1125	2790.89	3066	2213
SRO77:YBL106C	41	82	162	84	50	43	26	57	44	51	37
ADE6:YGR061C	365	678	764	664	367	288	211	538	267	319	385
GSY2:YLR258W	828	3345	2005	2783	742	1215	788	653	362	1173	293
HMX1:YLR205C	6	27	20	32	8	10	9	18	24	15	9.16523
EBP2:YKL172W	16	32	52	26	48.5294	41	62	79	12	27	50
PPX1:YHR201C	45	122	132	127	39	33	36.2783	57	35	35	38
SAP4:YGL229C	36	128	121	147	34	57	28	40	46	56	24
CFT1:YDR301W	79	303	274	302	94	86	68	130	82	105	84
PET494:YNR045W	34	124	71	84	36	45	31	31	36	46	27
AYR1:YIL124W	64	155	197	216	62	35	39	66	52	65	44
MRPS8:YMR158W	7	14	22	25	8	9	6	6	6	5	9
YKR040C	1.62839	0	0	0	0	2	1	0	1.23635	0	0
HEM15:YOR176W	70	147	198	213	78	63	96	92	69	96	61
HSH155:YMR288W	27	95	83	98	22	28	22	33	17	41	20
CNA1:YLR433C	37	63.9149	68.7394	73	30	36	23	42	17	29	21
UGO1:YDR470C	23	86	70	75	21	34	16	35	24	32	19
PCL8:YPL219W	41	126	115	132	34	33	23	30	29	42	25
OXP1:YKL215C	98	309	328	232	114	93	59	114	79	97	43
RKI1:YOR095C	1	5	5	5	6	5	9	25	1	12	28
YLR374C	0	6.20947	0	1.41781	1.22299	0	0	1.46698	0	0	0
RPL42A:YNL162W	42.9545	100.877	65.9091	86.7748	97.7044	30.8333	56.9032	119.489	47.4312	84.9231	138.466
RGI2:YIL057C	7	10	2	26	2	6	5	3	1	6	0
MMS22:YLR320W	49	154	138	134	47	46	33	57	45	62	29
tQ(UUG)L	2.66667	0	0	0	0	0	0	0	0	0	0
YDL034W	7.70573	30.5329	15.204	23.2906	6.31592	11.1412	8.81542	20.6751	7.38905	7.1013	13.8147
FTH1:YBR207W	41	189	158	173	54	45	35	83	40	80	49
EMC5:YIL027C	6	21	33	16	7	4	8	4	10	8	10
SAH1:YER043C	228	533	752	605	703	337	396	873	747	540	773
HYM1:YKL189W	20	91	62	85	18	11	22	31	23	23	12
DUG2:YBR281C	97	393	417	396	142	55	49	120	118	99	45
WHI2:YOR043W	105	230	269	282	76	81	55	82	67	80	74
CEG1:YGL130W	16	71	88	99	29	19	22	27	14	24	17
ADH1:YOL086C	2710.69	4391.38	5278.56	5057.59	3422.7	2813.8	2305.93	3486.73	2208.97	2772.9	3147.83
AFG3:YER017C	94	253	226	194	90	89	81	106	81	108	62
SKP2:YNL311C	32	107	113	107	14	15	15	31	31	14	29
YIL012W	0	1	2	0	0	2	1	3	1	1	2
PST2:YDR032C	152	264	426	360	112	161	130	153	82	123	72
TSC3:YBR058C-A	12	21	29	22	12	5	13	10	9	6	19
AGA2:YGL032C	59	91	166	133	29	28	42	39	0	1	1
YLR416C	4	1	5	3.32594	1	0	0	2	0	1	1
YMR155W	48	115	111	146	27	25	37	21	41	29	13
YOL106W	4	9.37567	17	4	10	6	3	2	1	3	4
YGR164W	0	3.08352	0	0	0	0	0	1	3	1	1
HEH2:YDR458C	49	150	140	123	44	62	37	61	42	66	29
SPP382:YLR424W	13	34	50	27	13	6	13	15	12	15	17
FLC2:YAL053W	109	319	399	302	122	115	120	171	159	170	106
LPL1:YOR059C	55	148	175	157	53	58	34	65	47	51	29
YIL171W-A	1.52066	4.86649	8.45997	7.15154	1.7179	0	0.5	4.1856	1.50047	1.86572	0
SSQ1:YLR369W	44	110	102	105	30	35	23	41	39	40	17
TYW1:YPL207W	72	133	107	99	63	61	56	102	49	68	55
YDR114C	0	1.15095	0	0	0	0	0	0	0	0	0
YPR077C	0	0	1.5892	3.5303	0	0	0	1.15805	1	1	0.569118
YOR238W	6	19	41	25	9	10	3	13	10	7	11
tW(CCA)M	0	0	1	1	1	1	0	0	1.33333	0	0
YEF3:YLR249W	1322	2422	1670	2144	3540	2358	1670	4158	1578	2729	3531
AFG1:YEL052W	79	291	264	266	108	102	68	102	40	123	52
RBH2:YJR030C	57.0443	106.126	155.208	107.201	49.0401	45.0587	24.0327	62.0526	41.0455	62.1101	39.0483
RAD59:YDL059C	113	234	345	322	113	41	22	87	87	41	53
STI1:YOR027W	283	474	451	420	358	357	217	377	422	350	190
RNH203:YLR154C	0	10	9	3	3	3	3	8	6	1	3
VMA22:YHR060W	6	20	23	11	8	9	3	10	9	3	14
YMR086C-A	8.72336	10.0803	12.7326	6.86703	1	3.39675	4.24118	3	1.06352	10.3255	5.36186
MRM1:YOR201C	47.1736	128.014	123.692	95.6733	27.8191	22.2158	9.84964	37.8131	27	34.8068	43.6284
YMR244W	3	4	1	3	1	0	3	1	1	0	0
REC102:YLR329W	3	5	5	8	1	5	4	5	2	6	4
YKL156C-A	3.56741	5.02958	2.61847	6.0871	4.57346	1.88021	2.63647	1.34914	3.57812	1.48515	9.25362
MRPL23:YOR150W	6	25	22	21	18	5	8	20	15	16	13
YOR365C	5.96085	17.536	19.8902	19.7052	7	14	2.8459	5.67464	2	9	1.4306
SPT23:YKL020C	108.696	494	288.84	354	144	175	118	153	141	188	92
FHL1:YPR104C	45	148	143	134	48	36	33	55	34	70	35
LSM12:YHR121W	10	41	44	35	16	6	5	21	9	18	12
COX4:YGL187C	16	38	56	59	19	13	16	25	35	20	13
POL2:YNL262W	142	335	436	275	157	131	82	189	90	183	111
SKG6:YHR149C	27	79	120	65	28	11	12	48	28	29	24
YDL162C	0	0	0	1	1	2.12167	0	0	0	2	0
PUF3:YLL013C	186.191	621.618	455	432.522	193	215	99	211	137	277	135
SPC97:YHR172W	30	74.8877	99	79	30	12	17	26	19	29	27
YNR040W	5	15	30	13	5	5	5	3	4	7	9
YHR033W	47	57	63	64	24	46	29	28	19	39	22
YDR246W-A	2	10	4	2	3	2	2	1	1	5	6
SEC61:YLR378C	128.713	396.239	330.567	332.349	235.138	149.056	110.807	224.384	118.281	254.112	160.707
MPM1:YJL066C	27.4091	93.5986	69.5039	55.477	24.5607	50.4071	24	20.7503	26	36.365	22.445
RQC2:YPL009C	102	207	195	195	106.471	110	90.2752	110	71	108	82
YHL046W-A	8.04905	20.9797	11.3851	20.4899	6.58239	9.37143	1.25896	8.05751	1.2959	7.34427	6.37749
YEL076C	8.72185	29.8371	35.4595	25.0392	17.7533	4.93064	7.20942	12.4462	14.1763	15.3864	12.4677
CTR86:YCR054C	12	24	35	30	13	10	4	10	2	16	16
YDL071C	1.14326	5	5	2	0	2.13375	3	2.1707	2.18295	1.12619	3
SPO11:YHL022C	0	8	9	11	3	3	1	4	4	2	3
HRI1:YLR301W	22	38	66	58	42	15	18	51	43	11	44
SRG1	12.7821	32.3363	63.4991	61.3886	3.14638	7.53591	2	8.22655	12.4702	13.3722	8.0924
TFC4:YGR047C	59	156	182	93	51	49	35	63	26	45	41
SIR2:YDL042C	14.8868	33	34	37	8	11	14	20.775	16	28	8.59519
VAM3:YOR106W	9	32	23	29	11	13	5	11	9	11	16
QRI5:YLR204W	7	24	19	22	3	14	4	5	8	15	14.8348
CTK1:YKL139W	16	40	48	39	13	11	14	22	16	19	23
RPL40A:YIL148W	68	217	160.693	162.643	172.274	93.7154	98	217	108	130.344	227
SNR32:snR32	1466	3091	3516	894	3009	2214	1123	3440	3057	2644	3721
MET31:YPL038W	8	30	51	48	5	3	3	9	17	13	7
YGR210C	45	87	112	92	77	59	44	78	74	60	56
ENT5:YDR153C	39	121	95	135	33	31	26	31	47	40	32
YLR012C	0	0	1	0	0	1	0	0	0	0	0
HXT5:YHR096C	85	267	152.294	346	61.1841	171	76	75.1193	83	117	38
SNR9:snR9	461.904	1015.94	1091.98	192.974	994.991	540.88	508.997	1246.99	762	1088.99	1660
UCC1:YLR224W	44	134	136	124	49	48	33	49	32	52	49
YSR3:YKR053C	31	69	89	72	35	23	32	34	20	26	18
YPR147C	20	32.5874	49.4841	66.0483	17	6.73082	13	19.5889	15	21	11.3601
AVT5:YBL089W	14.3046	52	65.3782	56	22	13.5689	14	30	12	21	18.5139
YJL028W	0	0	0	0	0	0	0	0	0	0	0
EDS1:YBR033W	50	59.6214	67	74	30	24	16	27	21	23	17
YOR396C-A	1.21656	34.188	11.4919	17.759	5.17502	30.8128	3.34606	0.471403	0.869861	2.22077	0.00348818
TIF34:YMR146C	80	162	215	126	104	86	85	143	85	103	140
YLR458W	0	2.32563	5.8618	2.48898	1.3905	0.664516	0	3.32202	0	1.84392	0
SNX41:YDR425W	15.9785	131.938	83	92	21.4439	22	24.282	22	35	61	12
ROM1:YGR070W	179	540	472	530	121	174	134	149	143	162	71
YCR007C	14	15	37	28	9	8	7	10	3	7	1
ELP3:YPL086C	13	47	45	36	23	13	20	33	12	34	40
CEP3:YMR168C	28	71	89	89	40	22	24	36	27	34	24
DED81:YHR019C	242	570	483	545	344	232	208	409	224	293	347
TGL2:YDR058C	17	22	26	20	4	4	10	5	4	8	1
YPR114W	55	232	203	220	93	47	59	87	66	79	69
VPS27:YNR006W	73.9792	156.813	154	153	62	83	34	47	65.7561	86.9993	53
RPS13:YDR064W	88	219	187	201	252	113	145	225	98	153	260
MCM7:YBR202W	54	132	193	140	68	38	29	66	32	44	44
SPN1:YPR133C	54	112	151	124	63	44	41	59	34	54	35
YPR169W-A	0	0	0	0	1.04423	0	1.37437	0	0	0	2.25937
YLR264C-A	0	5	15	29	4	3	0	10	3	3	8
ALG3:YBL082C	29.6266	65	82	89	42	18	22	49	22	31	27
RHO2:YNL090W	8.76213	31.733	40.7807	21.1203	26	14	17	12.9553	5.34139	14.3748	8.68257
TIF11:YMR260C	36	69	75	56	56	27	30	57	23	47	56
SPC19:YDR201W	4	20	21	18	1	7	10	3	1	10	3
GUD1:YDL238C	68	175	262	172	45	56	21	30	54	57	19
YPL247C	145	566	339	471	104	245	136	124	147	209	64
CPR2:YHR057C	37	101	79	66	34	36	23	28	27	28	25
HSP33:YOR391C	0	0	4.15743	5.67892	1	0	1	1.5	2	6	0
YKL107W	5	10	8	5	5	10	0	7	6	7	1
MRX6:YNL295W	20	96	101	90	42	33	17	38	30	39	20
YER085C	0	1.28006e-05	1	1.3727e-05	0	4	0	1.58259e-06	0	0	0
OXR1:YPL196W	28	86	66	105	27	21	20	28	21	24	9
CAK1:YFL029C	23	58	55	61	19	13	9	17	11	19	13
CSM3:YMR048W	9	27	44	39	8	6	4	7	6	8	3
MEU1:YLR017W	18	20	32	33	22	12	13	28	4	16	29
YLR307C-A	0	1	1	3	0	2	0	0	0	0	1
YDR366C	283.618	290.976	239.243	208.263	166.885	99.0729	87.0903	295.606	37.0265	119.155	286.702
TMA17:YDL110C	80	284	234	218	59	94	72	56	49	83	9
YER190C-A	0	0	0	0	0	13.1992	9.70118e-07	0	0	0	0
RPS10A:YOR293W	25	59	49	59	72	18	41	80	29	64	103
YDR545C-A	77.4137	77.7268	116.438	37.761	96.122	131.727	15.0277	50.6847	7.27287	120.438	0.971069
ENP1:YBR247C	9	12	22	4	10	8	7	11	10	12	13
ADY4:YLR227C	17	22.4406	25	39	11.6333	10	9	16	11	8	11
STE18:YJR086W	2.28689	36.3321	21.7454	14.5224	14	3.63251	3	9	3	9	6
TOA1:YOR194C	45	137	77	58	31	32	23	35	32	53	13
ARC18:YLR370C	17	63	59	74	13	12	12	26	21	29	14
YCR022C	1	2	2	4	1	1	3	1	0	0	0
TFC1:YBR123C	42	105	117	93	36	29	24	38	21	40.046	15.5268
AI5_BETA:Q0075	45	68	121	95	52	48	71	65	72	130	83
PIF1:YML061C	33	76	111	63	23	22	29	50	32	37	24
PPT2:YPL148C	8	18	19	22	2	2	1	7	2	4	3
YPR174C	17	36	42	27	16	4	4	18	7	10	12
CPA1:YOR303W	183.728	892.071	888.022	815.593	191.702	62	70	218.493	130	158	165.747
MRPL19:YNL185C	16	34	23	24	13.8942	9	10	10	10.6823	18	7
YHL042W	2	5	10	11	5	3	1	4	4	1	2
INP51:YIL002C	73	226	249	222	49	67	45	74	54	78	38
YLR156C-A	126.434	86.677	77.6802	71.3785	82.351	127.008	75.4685	48.5437	73.9241	43.1308	73.1223
LCB3:YJL134W	28	80	100	89.9463	38	12.7234	26	45	25	22	27
NHP2:YDL208W	11	20	19	20	22	10	7	20	11	22	30
RAD30:YDR419W	16	62	66	53	23	22	17	26	16	17	17
TOM20:YGR082W	27	56	42	47	30	18	23	41	33	29	35
RRT16:YNL105W	0	2.71149	0	0	0	0	3.70418	3.87092	0	6.11984	2.43428
KAR1:YNL188W	8	30	15	15	11	7	3	15	7	12	11
STP22:YCL008C	34	116	87	86	26	24	19	34	20	29	23
CUE3:YGL110C	43	116	96	100	30	30	29	35	24	44	26
VPS52:YDR484W	23	50	51	55	27	17	17	19	25	22	15
AHK1:YDL073W	43	110	138	139	36	31	28	55	16	40	43
YDR286C	7	6	18	16	3	2	5	3	2	3	5
YDR170W-A	49.4986	67.2656	62.0555	68.8894	24.0788	46.9499	25.3141	11.8126	18.5352	19.2801	13.0337
YLR342W-A	1	13	17	9	2	3	6	4	5	8	4
CAC2:YML102W	55	98.3518	100.447	95	35	30	46	44.7756	33	34	32.5305
YGR027W-A	1650.55	3575.24	2944.66	1850.1	1182.1	907.328	644.236	2730.23	602.076	952.575	2218.45
DBP8:YHR169W	4	11	19	12	8	3	9	14	6	9	24
RED1:YLR263W	20	32	56	21	13	15	5	17	5	10	7
SDO1:YLR022C	19	31.528	46.1038	35	16	11	9	25	8	6	15
RPA12:YJR063W	5	3	1	2	4	1	5	6	1	0	11
AIM19:YIL087C	21	56	48	60	11	11	11	15	12	19	4
ASE1:YOR058C	50	118	141	105	47	43	22	49	35	43	37
TOM1:YDR457W	509	1558	1742	1351	656	666	379	820	500	802	464
OPY2:YPR075C	80.3361	217.892	234	185.944	56	74	27	87.8634	51.1897	77	37.9162
TPD3:YAL016W	119	315.533	353	428	130	106	101	150.217	115	150	97
HMG1:YML075C	132	348	440	353	131	164	110	160	297	139	109
YAR070C	0	0	0.5	0.5	0	0.5	0	0	0	0	0
NAN1:YPL126W	20	60	54	49	40	43	53	83	26	77	70
YIA6:YIL006W	11	51	49	43	14	12	9	14	18	20	9
YBR124W	0	0	0	0	0	0	0	0	0	1.95396	3.47324
YOR186W	1.90158	12	14	8	5	2	4	3	3	3	4
SED1:YDR077W	961	3546	3510	1815	982	1282	979	1163	1201	1820	748
MRP21:YBL090W	12	32	34	25	8	5	9	10	21	17	8
RSC8:YFR037C	113.081	227.267	224.871	147.364	95.5563	106.58	56.9962	102.313	61.0823	93.0136	47.5253
YOR011W-A	0	0	0	0	0	0	0	0	0	0	0
BRE2:YLR015W	7	17	16	22.2181	10	7	6	13	7	10	12
RRP42:YDL111C	23	43	36	56	18	13	12	23	12	17	19
MDM32:YOR147W	43	126	89	166	38	46	48	41	28	58	36
DPB2:YPR175W	16	48	67	49	17	19	16	29	17.2917	20.2696	21
tT(AGU)O1	0	0	0	0	0	0	0	0	0	0	0
PRP45:YAL032C	21	53	41	44	57	24	21	20	21	19	20
GAL80:YML051W	72	166	150	145	54	55	28	100	45	65	84
CDD1:YLR245C	8	35	41	28	9	10	11	13	9	11	17
VPS15:YBR097W	49	156	178	167	59	58	49	82	50	65	37
TPN1:YGL186C	63	223	281	250	55	42	40	48	68	52	29
ASN2:YGR124W	262	707	612	633	391	346	230	458	164	344	289
YDR406W-A	0	1.09996	2.16728	0	0	0	1	0	0	1.09552	0
INP53:YOR109W	132	416	488	440	145	138	101	188	129	174	108
AVT2:YEL064C	24	29	59	38	11	10	10	11	16	9	5
PLP1:YDR183W	3	8	22	14	10	2	4	3	2	2	5
SHG1:YBR258C	4	6.52491	10	12	1	0	1	5	3	4	3
UBP2:YOR124C	140	515	506	400	180	175	142	180	152	189	88
ATG33:YLR356W	52	104	100	108	22	22	27	29	28	51	16
YGR069W	0	4.21027	0	3	0	1.31633	2.51107	4.43661	0	1	2.50891
SCP1:YOR367W	10	29	43	34	10	6	5	18	8	15	12
SEC63:YOR254C	59	145	176	137	114	55	51	132	73	97	69
NCL1:YBL024W	42	95	107	108	62	52	31	116	22	47	79
OYE3:YPL171C	47	51	79	22	28	49	23	30	105	51	32
PGK1:YCR012W	2903.6	3636.31	6307.6	6129.72	3076.19	2658.79	1693.21	3078.71	2438.43	2387.46	3012.42
YML018C	110	428	486	377	101	31	12	86	82	61	42
TVP38:YKR088C	9	71	73	63	18	7	13	25	24	18	27
RAD34:YDR314C	22	77	88	62	44	34	35	51	35	43	31
LCD1:YDR499W	20	58	71	63	15	15	12	34	15	18	17
NTR2:YKR022C	11	48	39	39	9	10	5	14	13	6	9
MRD1:YPR112C	31	35	18	13	39	47	43	71	15	60	65
SIT1:YEL065W	39	104	90	133	65	46	59	89	30	63	102
EST3:YIL009C-A	11	21	17	23	9	6	3	5	7	5	7
RDN37-2	131691	143693	332286	194727	211331	185661	212547	308245	382790	287258	374139
SNR77:snR77	79	76	66	17	50	82	109	40	34	108	63
YHL009W-B	29.7333	71.4028	126.411	33.3551	26.8685	12.9687	11.9377	35.7191	21.8783	0	15.5368
PUN1:YLR414C	41	122	117	172	63	37	49	62	50	46	61
FBP26:YJL155C	72	242	222	218	64	73	60	48	75	66	27
YDR098C-B	1671.65	2247.25	1276.1	1623.43	558.924	562.837	473.785	2318.98	598.639	722.573	1369.11
MSL5:YLR116W	44	148	78	104	57	37	31	54	33	60	31
GCD11:YER025W	106	184	238	221	152	116	83	182	113	127	174
PIR1:YKL164C	110	525.667	648.855	490	125.922	178	131	133	98.1567	229	99
AXL1:YPR122W	83	227	305	282	80	62	63	96	60	53	56
SHC1:YER096W	10	28	25	26	6	15	13	13	8	10	5
tL(CAA)N	0	0	1.4	0	1.25	0	0.4	0	0	0	0.3
GPB2:YAL056W	109	431	317	272	80	130	61	111	98	141	54
MSS4:YDR208W	85	335	303	294	101	89	71	118	95	117	79
THI4:YGR144W	2	3	4	3	2	2	1	3	3	2	2
BIG1:YHR101C	13	11	20	28	4	3	2	8	4	6	2
PEX4:YGR133W	12	24	39	41	11	8	6	12	7	12	11
tY(GUA)Q	0	0	0	0	0	0	0	0	0	0	0
MMS2:YGL087C	22	46	58	44	22	22	13	9	12	15	18
ADH4:YGL256W	33	89	94	109	44	21	21	38	32	27	33
SUR7:YML052W	35	182	166	176	58	26	31	80	41	78	62
CTF19:YPL018W	21.5251	59.4127	76.1943	68.8431	12.5964	19.3039	12	22	18	25	9
URE2:YNL229C	36	102	95	100	32	31	32	40	36	47	31
GAS3:YMR215W	23	222	247	166	100	28	52	109	90	110	102
ITT1:YML068W	17	98	86	61	12	16	10	13	22.3432	20	10
RHB1:YCR027C	10	27	39	39	8	4	3	4	7	6	4
YBL113W-A	2.06962	34.5952	41.7632	14.8783	17.7053	16.7016	5.06192	5.86754	9.1017	4.93376	7.03212
ATG12:YBR217W	5	20	20	24	6	6	2	8	1	7	4
PRP5:YBR237W	43	156	153	118	35	51	31	53	49	42	23
SNR86:snR86	8777	11034	9021	8256	13589	18419	6371	10624	13185	9749	8400
YLR456W	1	9	11	7	1	1	0	3	2	6	3
UBP9:YER098W	50	122.218	119.876	127	57.7172	61	40	73	38	84	29
NAT4:YMR069W	0	4	7	1	3	3	1	5	2	0	2
SYP1:YCR030C	137	533	441	394	134	185	122	169	165	247	71
ERG7:YHR072W	86	169.94	225.692	180.3	67	63	64	87.7206	84.4623	77.6153	63.8792
YIL166C	14	30	47	62	10	8	10	18	6	11	9
YJL047C-A	12.1027	29.0279	0	24.7463	11.0588	12.2754	22.2212	15.1336	0	24.0344	9.98903
TAO3:YIL129C	333	1102	1051	930	289	350	192	366	247	428	176
IPT1:YDR072C	74	212	224	256	65	60	82	108	80	121	96
YPL060C-A	0	44.2756	0.00550937	74.9522	0.000380821	12.9687	11.9377	11.9466	0	33.6352	22.1729
YPK1:YKL126W	115	358	404	422	129	93	85	153	116	165	74
RIM9:YMR063W	10	37	40	47	5	5	3	22	13	7	7
VHR2:YER064C	9	38	25	24	21	9	17	53	18	27	82
tQ(UUG)D1	0	0	0	1	0	0	0	0	0	0	0
IRC11:YOR013W	6	9.08272	20.0054	13.3505	7.16652	6	3	9.25518	1.086	4.30188	9
MRS4:YKR052C	36	112	82	119	42	34	40	53	39	51	30
YML079W	16	32	62	62	15	11	11	17	22	19	18
MGM1:YOR211C	95	267	235	251	72	94	58	105	51	102	38
RDH54:YBR073W	80	195	331	193	84	72	60	81	74	81	48
YNL122C	7	15	6	2	0	2	0	5	3	2	8
ALF1:YNL148C	16	33	34	17	10	18	4	8	4	12	4
YNL217W	13	28	49	53	20	12	8	26	31	13	16
tQ(UUG)C	1.33333	0	0	0	0	0	0	0	0	0	0
LCP5:YER127W	10	14	20	12	2	3	6	10	1	5	17
PTC5:YOR090C	58	140	176	160	45	47	29	73	53	68	43
YPL152W-A	0	1	1	1	0	0	0	0	0	0	0
SCR1	15802	11107	25371	16691	28126	13587	23655	15188	19202	16048	39713
CAB4:YGR277C	10	40	48	38	29	9	8	15	17	8	10
URA1:YKL216W	149	326	477	555	311	191	293	424	7	333	284
HPF1:YOL155C	731.211	2449.23	2020.79	1479.09	1083.73	1756.49	657.164	1166.53	620.788	1107.73	645.869
SRP72:YPL210C	42	76	105	90	42	45	39	61	40	58	35
RDS3:YPR094W	2	3	7	2	2	1	0	5	1	2	2
RPS21B:YJL136C	22	56	45	42	57	21	23	99	30	51	108
LDS2:YOL047C	19	61	55	49	10	56	19	11	21	28	4
EST2:YLR318W	7	32	36	28	9	4	4	11	8	12	7
HST2:YPL015C	90	192	247	248	82	65	64	100	59	84	63
YBR197C	15	40	52	36	9	10	9	23	6	14	14
YGL034C	2	5	2	6	1	3	0	2	3	2	1
FRS1:YLR060W	113	209	298	268	175	150	129	196	137	170	173
RPT1:YKL145W	167	311	417	290	178	142	125	147	138	177	82
tL(CAA)M	0	0	1.4	0	0	0	0.4	1	0	0	0.3
HEM12:YDR047W	27	137	149	161	64	57	53	80	59	80	43
TPO1:YLL028W	75	302	510	244	81	45	38	81	101	71	68
PRP38:YGR075C	1	18.3076	16	15.284	3	4	6	5	5	1	4
TWF1:YGR080W	22	80	79	74	33	23	19	20	22	22	21
CRS5:YOR031W	15	80	44	65	14	12	9	13	11	10	8
APT1:YML022W	17	31	31	33	19	13	18	33	19	22	48
SNR63:snR63	5783	5412	6037	4514	7740	6743	3501	9924	5428	5526	11069
ERV14:YGL054C	27	66	95	101	21	19	25	43	17	37	31
RPF2:YKR081C	13	10	12	6	6	6	10	29	12	19	22
CBP4:YGR174C	36	101	63	86	16	55	18	21	22	33	15
SGM1:YJR134C	47	109	124	116	39	52	42	58	35	61	28
TIF4631:YGR162W	143	250	289	171	265	229	192	331	136	264	273
BDH2:YAL061W	619	1131	607	835	284	567	252	292	104	432	107
YBL036C	16	45	54	23	20	12	21	14	9	18	10
YBR221W-A	0	0	2	1.09561	0	0	0	0	0	0	0
MDG1:YNL173C	85	316	185	231	99	154	97	115	64	138	60
tA(AGC)F	1	1	4	0	0	0	0	0	1	0	0
YEL008W	1.41692	0	5.72636	5	1.4157	0	3	1.3864	1	4.23579	3
ALG11:YNL048W	46	115	163	171	33	24	32	55	47	32	25
YCG1:YDR325W	27	84	118	76	32	26	19	55	20	29	24
FLR1:YBR008C	39	116	136	142	33	28	15	50	86	52	49
POP3:YNL282W	6	17	21	19	1	5	3	5	3	3	8
ADH5:YBR145W	103	416	219	340	70	48	49	41	90	69	15
RET3:YPL010W	28	71	106	94	34	16	32	30	29	31	50
SRF1:YDL133W	32	85	117	116	31	28	28	35	29	36	19
MDM10:YAL010C	9	43	36	32	12	10	6	15	14	16	12
YAR060C	4.5	21.5	22.5	14.5	5	7.5	2	8.5	4.5	7.5	3
YNL303W	0	2.15542	3.27098	3.54235	0	0	0	2.01246	0	1	2
tA(AGC)K1	0	0	0	0	0	0	0	0	0	0	0
BUD21:YOR078W	6	18	18	13	8	8	12	11	3	8	9
DSS1:YMR287C	30	68	82	67	40	20	22	38	21	24	21
YFL065C	9.80449	16.8975	9.2688	0	2.53911	0	0	2.28285	10.3871	0	0
CDS1:YBR029C	37	111	106	98	63	25	16	81	68	50	74
SCS7:YMR272C	116	312	474	382	135	161.197	137	155	142	189	122
IME4:YGL192W	81.7514	121.031	96.0464	151.717	68.0153	105.618	32.4533	41.0216	49.6262	59.5015	4.74348
HTD2:YHR067W	8	28	53	41	14	10	8	12	19	12	10
YAL065C	2	23.9784	23.177	9.17844	8.26088	12.3903	6.66247	14	2	1	2
YLR171W	0	0	0	0	0	0	1.78993e-06	0	0	0	0
YGR161W-A	35.2925	242.189	156.011	181.532	46	14.3678	34.6432	146.47	57.2046	63.817	83.3897
INP2:YMR163C	18	66	109	96	27	21	12	27	10	22	14
MSO1:YNR049C	9	25	28	21	6	9	5	8	13	13	5
YCS4:YLR272C	23	122	139	124	46	26	26	60	30	66	46
YMR114C	69	91	53	56	16.6097	38	24	28	21	38	14
YJL152W	0	3.11427	4.95382	6.39953	1.90988	0	1.504	2.76601	1.15219	5.60927	0
ATP25:YMR098C	25	49	85	70	19	22	22	26	29	17	18
YJL067W	2.59094	9.4014	4.49608	9.52296	3.43929	6.59289	0	1.24973	0	4.63502	1.55497
GIS4:YML006C	26	109	103	92	39	19	22	51	36	37	43
YDR118W-A	0	2	6.86758	0	0	1.69731	0	0	0	1	2
NFT1:YKR103W	35	93	131	90	30	37	28	42	37	53	29
HAP4:YKL109W	139	605	328	363	197	196	155	197	136	321	119
UBC6:YER100W	26	81	100	72	38	21	21	35	24	31	26
RSP5:YER125W	290	957	815	718	319	263	254	353	257	367	305
RNP1:YLL046C	0	0	1.91519	1	0	0	0	0	0	0	0
TDH1:YJL052W	722.583	792.53	1235.89	949.442	357.069	862.04	394.881	331.806	344.399	458.68	206.571
FYV10:YIL097W	9	82	92	88	22	33	20	27	31	24	13
CDC36:YDL165W	9	31	32.4966	26	3.19091	15	4	23	8	8	11
PIN2:YOR104W	12	43.6588	42.1237	39.3423	14.58	8.72802	3	14.1938	19.0717	11.7648	12
THI73:YLR004C	7	22	30	29	3	3	1	11	4	4	2
MNL1:YHR204W	35	98	124	110	32	20	19	48	30	33	44
INH1:YDL181W	26	83	75	63	22	30	24	24	20	31	7
VBA1:YMR088C	32.5264	109	183	157	51	39.8726	46.5122	71	66	70	45
URA10:YMR271C	18	30	40	28	9	8	12	11	19	13	7
YNR062C	6	10	23	12	6	4	8	6	6	3	5
YHL026C	15	42	43	33	12	22	13	27	13	18	12
CCS1:YMR038C	83	99	138	88	60	61	49	68	75	71	58
SUL2:YLR092W	1070	4131	4374	2722	1172	669	168	993	652	788	230
NFS1:YCL017C	61	142	155	149	60	67	49	75	64	61	54
YCR016W	2	15	14	12	14	5	7	15	7	7	12
YPT11:YNL304W	15	47.8446	35.729	42.4576	12	19	7	14	6	21	8
PRP24:YMR268C	9	14	15	20	8	1	4	12	2	6	9
VMA5:YKL080W	144	256	362	440	193	101	145	179	124	148	188
SLY41:YOR307C	26	93	92	111	35	17	12	45	28	43	27
PDS5:YMR076C	49	121	180	121	47	43	35	61	39	39	39
BAT1:YHR208W	225	450	423	353	175	142	70	258	324	182	203
UBP8:YMR223W	19	43	44	46	13	13	13	28	10	9	10
ADK1:YDR226W	67	127	183	135	167	80	68	125	67	102	119
CCC1:YLR220W	64	148	189	143	41	41	31	61	57	63	28
ARC35:YNR035C	60	212	169	170	63	58	54	39	51	72	48
MSC3:YLR219W	126	389	330	321	108	154	77	111	115	153	72
YML012C-A	3.0013	11.3617	12.3553	6.13466	6.22174	1.93739	0	4.45931	2.10016	2.89878	0
FMP23:YBR047W	8	17	19	17	2	5	1	8	6	4	6
tC(GCA)P1	0	0	0	0	1	0.25	0	0	0	0	0
YOR034C-A	5	12	16.989	7	4	6	3	8	6	8	6
TRS23:YDR246W	16	46	40	40	21	15	18	14	16	18	10
ABD1:YBR236C	57	101	89	107	31	37	24	54	30	30	29
COY1:YKL179C	54	228	193	163	65	83	34	74	49	78	35
DAP2:YHR028C	218	527.341	611.533	554	168.175	214	116	182.292	193.288	204	107.585
SVL3:YPL032C	95	329	323	245	127	84	80	172	111	147	109
YOR376W	0	0	4	8	0	0	2	0	2	3	0
AHC1:YOR023C	87	278	186	180	70	65	48	80	51	107	38
UFE1:YOR075W	9	27	57	33	10	6	17	18	14	9	7
YCL023C	2.43057	0	0	2.00953	0	0	0	4.62172	1.70457	0	1.43092
HIR1:YBL008W	20	53	53	46	20	15	14	22	9	12	23
IDP1:YDL066W	224	672	891.92	936	303	232	207	422	201	267	366
YOL162W	19	73.8002	119.571	132.279	6.12302	5	2	11	20.289	12	2
PMS1:YNL082W	30	64	98	71	23	18	17	32	19	27	7
MCX1:YBR227C	23	52	71.7315	41.9934	21	15	16	23	25	26	15
VPS33:YLR396C	34	92	110	114	32	28	26	39	14	33	31
OPI7:YDR360W	2.32916	5.65962	19.5539	12.0854	0	3.3428	3.99693	17.9309	7.66246	3.32263	6.05469
ATG10:YLL042C	0	0	1	1	3	1	0	1	1	0	1
WSC3:YOL105C	45	226	158	125	47	77	50	69	29	88	36
YJR124C	9	26	31	21	19	8	4	13	6	12	12
MDM1:YML104C	51	151	191	122	59	33	16	74	67	54	47
BAP2:YBR068C	171	655	276	605	180	201	314	283	225	285	241
RPL21B:YPL079W	39	112	88	99	127	65.4114	74	146	76	86	190
ISM1:YPL040C	30	111	91	102	36	36	29	48	47	57	42
YLL066C	230.871	483.354	613.117	372.586	130.946	200.733	78.0495	222.41	109.921	199.842	45.1229
DAL5:YJR152W	19	50	56	73	23	18	20	17	46	25	11
RPS6A:YPL090C	112.108	234.761	163.559	176.742	377.492	229.031	190.714	308.366	143.496	215	298.148
RMD5:YDR255C	57	168	151	185	61	71.7482	35	67	55	64	24
YCR018C-A	53.6989	50.7504	29.4351	28.4015	21.4825	23.3051	1.35741	29.4787	6.94694	19.7725	12.6495
HSP104:YLL026W	1139	2374	1720	1864	1090	1488	873	832	981	1287	515
ACF4:YJR083C	7	21	22	24	12	7	4	7	12	12	10
OPT2:YPR194C	52	174	164	88	34	24	19	24	300	72	21
RPD3:YNL330C	45	141	136	113	49	48	40	57	31	62	42
TED1:YIL039W	42	106	136	143	66	39	32	85	50	65	68
YLR269C	1.23538	2.20844	4.48638	1.08358	0	0	0	2.43369	0	0	0
YER165C-A	7.66082	39.4928	30.5755	30.9657	20.2887	9.64993	5.50648	20.262	9.93272	19.5256	15.088
NSE1:YLR007W	11	30	45	37	21	3	7	19	4	9	13
MSC6:YOR354C	42	130	145	123	46	49	44	72	56	65	41
CUP9:YPL177C	29	103	130	110	27	32	30	30	23	28	27
MRH1:YDR033W	166	516	711	544	242	156	184	348	223	224	357
RPL26B:YGR034W	57	110	92	118	158	100	127	184	88	111	218
ATP17:YDR377W	25	36	62	71	23	12	17	22	11	28	17
YNR075C-A	0	6.83208	8	3	0	0	1	1	5	0	2
PAU11:YGL261C	1.06774	2	0	0.518519	0	0	0	0	1.14286	0	0
ARG7:YMR062C	164	508	646	850	87	72	55	86	162	71	64
GPP2:YER062C	131	172	452	301	76	92	64	137	65	103	116
TAE1:YBR261C	13	13	32	22	14	12	2	20	13	6	13
HSP60:YLR259C	476	788	894	712	623	558	275	486	524	479	350
YGR139W	4	4	5	4	4	1	0	5	3	1	2
TDA5:YLR426W	24	45	60	63	18	24	10	23	15	15	17
YKL222C	17	35	67	58	13	16	10	21	6	15	24
PXR1:YGR280C	13	25	15	16	10	13	15	18	12	16	19
MDM35:YKL053C-A	16	36	35	27	12	11	14	10	12	15	16
FMP49:YER038W-A	0	9.04007	8.81534	11.1184	0.234601	0	0	0	1.48363	0	0.187817
OSH3:YHR073W	114	433	407	309	125	133.518	85.5822	169	110	148	102
DBR1:YKL149C	14	73	42	65	13	20	12	24	7	17	16
GDB1:YPR184W	1117	4309	1978	3193	571	1858	717	618	473	1459	237
PSF3:YOL146W	11	5	27	10	7.28417	7	5	7	2	3	12
PET309:YLR067C	23	79	64	64	24	20	8	39	16	24	15
YLR345W	78	264	201	291	61	89	73	65	78	102	41
TRP5:YGL026C	445	1097	1101	1195	417	322	187	475	311	390	360
tR(ACG)E	38.022	59.9118	70.055	31.1279	8	11.4066	19.3083	41.3041	6.23123	8.62646	14.1035
AAH1:YNL141W	14	16	37	20	24	21	22	31	18	23	54
WHI3:YNL197C	69	359	271	230	107	105	57	138	96	155	76
YCL019W	153.795	260.843	181.323	175.543	109.588	59.3467	73.2039	131.335	385.97	95.697	77.5832
SHB17:YKR043C	69	111	146	111	90	50	70	103	69	82	87
YFH1:YDL120W	16	37	45	42	10	15	9	21	15	16	17
YOR333C	2.02269	7.43127	2.56905	2.85227	4.9946	1.61611	2	0	2.48692	1.95991	3.83321
NCS6:YGL211W	24	58	70	43	20	16	11	23	15	26	23
MTC6:YHR151C	20	88	85	94	20	15	12	39	13	27	29
tL(UAA)B2	0	0	1.5	0	0	0	0	2	0	1	2
GEA2:YEL022W	91	218	282	197	128	68	50	166	76	132	107
HSH49:YOR319W	5	22	27	8	4	3	5	3	3	12	7
BLI1:YKL061W	10	23	23	20	5	9	14	10	8	6	6
GCV2:YMR189W	431	766	1952	1065	232	198	65	275	305	146	226
GCN3:YKR026C	11	28	35	30	12	7	14	42	8	15	13
GCN5:YGR252W	23	80	80	77	25	31	19	35	15	24	26
GAL3:YDR009W	15	20	26	20	9	8	9	11	17	14	10
PAN3:YKL025C	40	150	114	137	45	35	21	54	41	49	24
tD(GUC)G2	0	1	1.10893	0	0	0	0	0	0	1	1.6235
BOI1:YBL085W	85	292	230	192	116	113	51	163	97	143	90
RPB9:YGL070C	6	23	25	29	11	13	9	7	8	11	12
SMI1:YGR229C	74	190.049	236.215	201.547	97.7945	87.0376	63.3729	116	81.1726	98.7007	85.1827
FCY2:YER056C	112	369	393	369.777	139.847	69.7656	129	154	150	149	181.914
YER107W-A	1.12949	5.21586	14.1139	5.24663	1.34179	3	4.19965	3	3.77507	6.74294	7.05637
YNL193W	39	108	88	106	42	34	33	57	42	41	27
tE(UUC)G3	0	0	0	0	0	0	1.70238	0	0	0	0
MAP1:YLR244C	55	120	99	133	54	49	55	69	33	71	66
RRN3:YKL125W	32	54	71	58	31	23	19	30	14	23	24
CTF8:YHR191C	7	17.3223	10.0785	9.14944	2	5	8	3	2	3	4
YPR170W-B	11.7863	36.9358	60.782	45.9051	24.8988	18.9145	15.6256	27.9506	18.9285	33	36.4607
YKL070W	22	59	75	78	14	14	12	22	17	20	27
SPC105:YGL093W	68	218	246	191	67	56	49	79	47	66	44
APL3:YBL037W	59	181	196	200	57	59	44	82	46	75	50
YKL145W-A	0	0	0	0	0	0	0	0	0	0	0
CLD1:YGR110W	24	57	37	88	10	7	19	17	17	19	13
MSS2:YDL107W	10	26	20	21	14	5	16	10	10	8	5
SLM3:YDL033C	15.596	33	41	32.4134	21	16	10	23	16.3861	15.0996	16
YAP5:YIR018W	43	101	148	128	34	19	14	42	33	23	11
YOR283W	18	54	58	50	26	12	12	29	20	11	15
YMR052C-A	1.19044	7.57562	9.56652	8.32041	0	0	0	1	2.4451	0	1.09181
PMT6:YGR199W	73	158	216	199	49	50	36	62	40	48	38
YOR053W	1.0332	60.3836	0	15.6643	3.59359	0.913767	12.2112	9.0492	0.796506	8.62937	0.161725
CAF130:YGR134W	40	112	124	111	55	27	24	56	29	39	38
CUP1-1:YHR053C	6.95925	5.10555	15.3096	53.2078	23.4343	15.3709	11.1058	23.0184	2.31485	14.7142	16.9001
YER084W-A	0	1.99999	0	0.999986	0	0	0	0.999998	0	0	0
HNT3:YOR258W	8	16	14	20	3	10.1291	4	6	7	2	8
MATALPHA2:YCR039C	21.9198	56.6087	62.2782	46.4817	11.1522	1.17274	14.4988	6.39597	24.9094	42.8201	24
PHS1:YJL097W	12	44	57	38	20	7	5	23	9	22	13
YHL005C	1	3	4.71094	0	1	0	0	0	0	0	0
MEP1:YGR121C	71	209	216	202	97	68	64	75	72	109	50
RPS29B:YDL061C	39	91	80	89	77	40	59	155	37	64	146
SNO4:YMR322C	1	4.66947	0	0	0	0	0	0	0	0	0
YDR029W	12	38	33	27	16	9	9	22	14	13	11
RPC37:YKR025W	11	27	30	20	13	8	14	14	7	11	15
YNL043C	9.66978	38.2162	22.1087	34.8577	8.91137	8.05527	3.9927	16.6551	6.9393	6.38933	11.9447
MET32:YDR253C	102	259	304	264	138	47	27	60	71	59	32
tE(UUC)L	29.1871	0	0	0	0	34.1667	34.0476	0	0	1.33333	8.35714
CWC23:YGL128C	10	27	24	24	9	5	2	8	5	8	4
LAP2:YNL045W	146	512	363	556	128	135	105	142	120	162	92
SMT3:YDR510W	40.8929	75.7237	105.867	92.8847	52.8455	41	39	50.6577	25.7791	34	71.7317
PLM2:YDR501W	15	29	48	43	9	9	11	21	8	19	12
Q0143	0	0	0	0	0	0	1	0	0	0	1
YOR097C	12	52	33	38	7	11	8	9	12	10	11
YOR072W-B	1.02888	0	0	0	3	0	0	0	0	0	1.09736
COS1:YNL336W	53.5066	86.2735	127.7	111.998	38.5083	34.2616	37.5198	39.7835	33.0874	53.7298	28.8276
tS(AGA)G	0	0	0	0	0	0	0	1	0	0	0
ECM27:YJR106W	22	124	119	110	36	31	28	60	43	61	23
YOL107W	9	50.6243	59	57	17	7	5	15	31	19	4
MRX7:YNL211C	2	7	3	7	0	3	1	3	3	0	4
RPL1A:YPL220W	77.4	221.299	182.762	235.473	254.407	150.695	173.342	262.812	94.5455	177.618	311.025
HUG1:YML058W-A	2	3	0	3	1	0	1	1	1	1	0
YMR141W-A	0	5	1	2	1	2	1	4	2	2	8
CPR7:YJR032W	10	19	30	17	17	6	11	24	9	7	10
ALG9:YNL219C	43	123	167	168	42	44	37	66	49	67	49
IKI3:YLR384C	145	334	307	293	192	154	88	222	96	202	139
MAK10:YEL053C	14	110	90	71	44	41	35	61	34	58	32
FPR2:YDR519W	9	30	47	53	24	13	5	12	16	14	22
ARO7:YPR060C	13	16	37	32	12	10	8	18	10	3	14
YNL320W	13	30	44	47	12	10	6	14	6	12	10
FKS1:YLR342W	1695	4868	6085	4776	2104	1945	1441	2691	2046	2631	1555
YMR1:YJR110W	38	129	145	135	32	47	17	60	32	37	29
RTS1:YOR014W	165	546	446.631	483.579	172	168.081	142	197.607	161	208.438	109
SNR64:snR64	75	68	57	19	55	51	51	36	43	74	57
SEN34:YAR008W	7	22	28	17	7	3	4	10	3	7	2
HAP2:YGL237C	22	89	61	69	21	21	7	14	22	28	11
PUT3:YKL015W	63	162	158	170	68	51	40	99	55	79	45
NAP1:YKR048C	142.459	298.38	299.497	259.372	163.614	229.053	96.0638	138.984	92.6711	119.516	98.411
IGO1:YNL157W	31	70	85	103	16	20	9	16	30	33	21
PAU4:YLR461W	0	3	1	2.07407	0	0	0	0	0	0	0
SPO24:YPR036W-A	218	2219	828	1086	430	338	359	479	182	656	272
FLO11:YIR019C	96	249	218	184	73	155	36	59	37	132	31
YBR190W	1	0	0	3	0	0	0	2	1	1	1
RAD27:YKL113C	50	49	97	61	22	19	18	32	20	29	10
JLP2:YMR132C	7	9	12	13	4	1	2	3	6	3	4
POF1:YCL047C	15	23	23	37	5	6	9	2	14	11	11
GUP1:YGL084C	50	161	117	114	45	36	31	63	43	65	33
PAU15:YIR041W	1	2	7	0.0118745	0	0	0	0	0	0	0
MXR2:YCL033C	19	22	35.2471	26	3	13	17	9	13	9	9.30925
MRS6:YOR370C	77	237	270	260	84	86	57	112	74	82	100
TRM7:YBR061C	6	11	12	21	9	4	6	13	9	5	8
MED8:YBR193C	7	26	47	28	13	8	4	8	11	11	12
ETR1:YBR026C	66.9452	171	182	191.978	61	61	41.9084	59.7198	56	62	28
SNR75:snR75	37	23	10	6	17	34	33	10.2419	8	33	20
CKA1:YIL035C	35	91	113	108	31	34	18	57	24	52	19
YPR160C-A	13.5541	0	0	0	0	0	0	0	0	0	0
YPR092W	0	0	1.39328	0	2.98018	3.43442	2.88569	0	0	3.19261	3.93725
CSM4:YPL200W	1.05839	3	2	0	2	2	0	1	1	1	2
SDH2:YLL041C	85	190	190	220	67	91	69	58	68	101	39
ESC1:YMR219W	166	564	369	323	177	239	109	227	122	212	108
XRN1:YGL173C	400	1267	1172	1060	518	552	339	665	341	658	355
RIM101:YHL027W	126	374	377	361	122	125	76	116	109	146	68
MSS18:YPR134W	11	41	48	44	6	8	7	9	7	6	7
MPP6:YNR024W	7.98974	9.60245	4.48657	7	8.00824	2.82982	3.85696	10	3	3.851	1.87444
GPX1:YKL026C	20	61	48	46	16	13	13	10	13	16	8
RPL37A:YLR185W	27	96	46	64	70	51	49	181	45	98	120
ACE2:YLR131C	20	113	99	79	40	22	17	38	39	29	35
ARP2:YDL029W	92	209	258	245	113	112	76	119	88	106	80
APL1:YJR005W	57	125	136	178	57	41	43	51	47	80	43
PFA5:YDR459C	30	59	68	77	16	9	6	19	18	9	12
CWC24:YLR323C	3	3	9	11	6	4	1	5	3	3	4
UPF3:YGR072W	17	33	34	34	10	9	24	20	11	15	15
YMR196W	557	1582	1500	1306	308	698	341	397	279	581	151
GRX3:YDR098C	36	47	90	82	49	9	48	41	19	39	29
RPS26B:YER131W	63	108	62	71	140	53	84	159	92	80	176
RIM1:YCR028C-A	13	40	53	54	29	17	20	36	19	28	25
CGI121:YML036W	2	15	13	8	7	2	2	7	3	4	2
LDB18:YLL049W	5	10.0901	23.1295	20	7	8	5	7	3	4.06892	9
HCM1:YCR065W	80	266	347	245	60	55	34	83	52	63	35
CDC39:YCR093W	376	1387	1046	1112	473	516	376	667	366	643	295
PRY1:YJL079C	230	462	588	265	174	210	97	173	76	178	108
FSH1:YHR049W	16	44	56	65	36	20	28	40	29	27	33
PEX25:YPL112C	7	36	39	52	8	16	10	21	7	16	21
YOR192C-C	17.1514	20.7121	19.3229	17.0176	13.3013	13.5595	9.18587	22.6337	9.1881	6.30484	26.758
IDP2:YLR174W	38	74	101	105	16	32	16	21	26	32	10
SAS10:YDL153C	24.5279	29.222	19	13	31	43.8611	29	61	11	32	38
CEM1:YER061C	46	88	102	75	21	32	11	25	26	24	17
tC(GCA)B	0	0	2	0	2	0.25	0	0	0	1	0
PAN5:YHR063C	26	69	111	91	32	18	36	49	50	28	38
DBP7:YKR024C	6	16	26	6	6	6	6	29	8	6	25
SMB1:YER029C	34	61	32	30	19	14	7	23	17	21	13
FAR11:YNL127W	73	219	214	214	70	71	41	74	61	102	58
YJL120W	0	2.0954	2.14656	2.21244	0	0	0	0	1.11753	0	0
PET130:YJL023C	10	14.9044	24.4682	34	11	8	6.78419	4.975	10	10.752	8
YPR078C	3	8	11.4108	7.4697	0	1	0	2.84195	4	0	1.43088
ALA1:YOR335C	257	577	614	583	379	260	195	460	257	335	271.788
STE3:YKL178C	0	3	5.42009	6.18051	4	2	0	3	98	269.97	157.349
ENT2:YLR206W	154	584	498	402	127	184	112	154	124	177	91
YDL129W	7	26	16	16	6	2	7	13	4	13	7
GUT1:YHL032C	181	368	259	363	152	191	118	131	110	170	101
LAA1:YJL207C	117	385	455	407	126	145	84	229	116	188	115
TOK1:YJL093C	69	219	265	274	64	52	51	81	70	77	51
YAL037C-B	42.6769	93.3762	137.655	126.875	132.003	6.42689e-06	132.115	140.954	71.6366	86.9671	128.527
CNE1:YAL058W	23	43.7286	52.0434	51.5892	6.39247	15.3828	10	21	12	14.9945	12
PSP1:YDR505C	114.719	480.556	421.637	484	131	162	117	145	201	181	74
YMR317W	167.6	438.903	418.703	305.585	168.173	253.384	66.0484	163.625	153	182.79	69
RCF1:YML030W	31	62	72	58	18	32	28	18	18	26	9
HHF2:YNL030W	61	438.142	223	320.785	90.3488	58	77.1937	152.95	48	112	68
PML1:YLR016C	9	9	26	28.7819	7	7	3	4	7	5	3
ERD2:YBL040C	15	38	73	50	23	13	17	26	14	25	32
CNL1:YDR357C	8	34	41	19	5	8	9	7	11	14	6
YHR071C-A	0	2.06048	1.30774	3.69991	0	0	0	5.27938	1.53769	1.38472	1.12084
RSM19:YNR037C	15	23	25	28	17	6	9	11	9	10	18
YGR296C-B	0.258216	2.16315e-05	2.08489	0	6.86199e-05	1.20743	0.842215	0	0.00552916	5.95201e-07	0
TMA23:YMR269W	1	10	8	5	2	1	2	7	0	0	8
tV(AAC)G2	0	0	0	0	0	0	0	0	0	0	0
YJR149W	5	22	34	35	9	9	13	6	10	16	12
YKL036C	0	7.32292	7.94651	15.7469	4.2799	1.37782	3.25887	1.04481	4.08386	4.96292	0
TRS33:YOR115C	28	33	56	46	11	5	7	16	14	9	11
PDE1:YGL248W	75	187	153	181	44	67	59	62	46	59	25
SNO3:YFL060C	3.5	1.94328	11.5	12.9231	2	6	4.5	6.5	2.33333	7	0
YLR173W	69	166	200	187	36	46	29	45	47	45	24
SPO73:YER046W	1	7	30	21	6	8	4	11	7	7	6.89869
SLM4:YBR077C	17	27	47	40	11	10	18	13	11	15	11
GAL11:YOL051W	140.239	433.453	370.546	308.384	125.448	169.139	72.0114	175.942	133.984	179.961	97.3902
ADE8:YDR408C	38	80	110	86	30	19	17	24	15	18	34
REV1:YOR346W	41	155.102	142.534	147.744	58	46	40	75.3443	40.6172	116.325	38.7844
ERV41:YML067C	41	66	59	77	21	21	19	35	31.6568	32	28
GGA2:YHR108W	55	197	187	193	111	70	55	125	114	91	86
YNL115C	112	228	223	218	43	91	68	73	58	78	36
PHO88:YBR106W	86	135	160	110	100	49	74	110	55	61	173
YNL247W	61	137	133	89	108	88	73	131	59	117	105
YLR123C	0	7.07186	2.69685	2.33089	1.2291	0	0	0	0	0	0
ARP1:YHR129C	13	28	43	32	7	5	4	11	4	10	6
CPD1:YGR247W	22	50	54	46	24	7	17	14	13	27	15
YOR345C	0	4.01781	6.46568	1.25615	0	0	0	11.6557	2.38284	3.67539	7.21562
YNR065C	61.765	208.518	217.502	196.306	54.6883	75.2313	15.1795	68.5155	59.6338	63.2988	31.2802
PRM15:YMR278W	105	281	249	270	94	146	70	102	70	121	45
IML2:YJL082W	158	451	376	401	199	246	127	210	248	204	86
SAY1:YGR263C	10	26	45	39	11	5	5	13	11	9	9
BNI5:YNL166C	28	67	79	50	29	27	25	46	21	33	20
RSC9:YML127W	92	251	246	237	100	82	58	88	68	94	68
CYB5:YNL111C	5	7	14	8	8	6	9	7	24	5	6
QCR8:YJL166W	18	109	69	110	22	22	25	31	35	40	28
tH(GUG)M	0	1.23238	5	0	1.25	0	2.69514	0	2	0	0
MIC27:YNL100W	32	137	88	114	30	33	45	32	37	33	34
YNL011C	25	100	114	138	22	35	41	47	37	40	24
MOT3:YMR070W	19	113	87	76	18	25	26	47	41	41	25
Q0032	0	0	0	0	0	0	1	0	0	0	0
DCD1:YHR144C	2	10	16	14	7	5	8	13	2	5	11
SEC15:YGL233W	74	174	216	248	80	90	40	104	63	97	61
SDD3:YOL098C	98	248	323	309	122	137	80	166	111	122	114
YOR020W-A	20	53	44	37	9	14	8	13	15	14	7
EST1:YLR233C	14	51	50	48	19	19	13	17	15	14	12
RPS21A:YKR057W	20	64	55	74	73	16	46	99	34	57	119
PXP1:YEL020C	26	71	80	89	14	29	7	24	20	23	14
TLC1	820	334	788	487	1112	284	451	736	451	357	1490
YMR158C-A	1	11	10	10	4	2	2	1	3	4	2
CSM1:YCR086W	5	11	25	14	5	5	25	3	9	3	4
ECM13:YBL043W	3	15	13	12	13	2	3	2	1	3	1
PFD1:YJL179W	4	12	11	8	2	4	2	4	3	2	8
ELG1:YOR144C	21	50	53	40	15	16	12	24	6	12	11
YIR021W-A	0	0	0	0	0	0	0	0	0	0	0
VTC5:YDR089W	65	218	366	319	64	56	30	68	82	60	35
MTQ2:YDR140W	12	23	35	27	15	10	13	10	8	10	10
PRT1:YOR361C	122	273	248	272	185	141	148	238	110	233	186
RCH1:YMR034C	9	24	14	30	8	6	4	5	5	9	11
MGR3:YMR115W	42	80	98	85	29	45	24	32	21	35	19
YMR130W	15	18	37	36	11	5	6	19	15	7	16
UMP1:YBR173C	18	52	61	51	16	9	12	23	12	24	13
LSC1:YOR142W	167	443	523	591	195	172	130	161	170	171	142
TRK1:YJL129C	69	292	308	197	104	113	51	130	84	118	65
YIR030W-A	0	0	0	0	0	0	0	0	0	0	0
YIL047C-A	46.4381	120.611	141.427	97.3637	31.3547	60.7128	0	18.7851	14.8322	12.7472	6.07473
HRQ1:YDR291W	62	127	153	131	42	39	33	59	33	39	73
PRP2:YNR011C	19	61	72	57	15	14	18	26	19	31	28
tW(CCA)G1	0	0	0	0	1	0	0	0	0	0	2.33333
YOR192C-A	83.0082	140.229	108.708	157.644	24.9094	10.8325	73.0776	164.807	62.9219	42.0687	128.954
MNT4:YNR059W	20	67	103	106	32	14	18	43	19	30	27
ARX1:YDR101C	12	8	13	18	21	9	15	35	9	21	45
GID8:YMR135C	91	427.379	350.76	368.735	85.6321	95.244	96.839	100	67.7353	138.784	64
SPO74:YGL170C	1	1	2	0	0	0	1	0	2	1	0
YER097W	0	9.78172	2.12362	1	1.28276	1	2	2	1	3	0
YSA1:YBR111C	84	154	169	165	46	85	87	55	67	75	50
VIP1:YLR410W	117	316	409	295	146	147	89	184	124	157	99
SUS1:YBR111W-A	6	18	18	8	3	7	7	6	2	6	6
tG(GCC)O1	0	0	0	0	0	0	0	0	0	0	0
MPC54:YOR177C	1	3	4	2	3	4	0	0	3	9	0
OLE1:YGL055W	136	209	242	204	184	120	102	159	101	177	220
YOR161C-C	0	6	4	6	4	0	0	0	1	0	3
tS(AGA)H	45.8806	0	7.11263	0	7.51381	18.1358	18.679	0	0	0	2.97219
BRR6:YGL247W	4	17	14	18	13	3	4	7	4	6	4
IMP4:YNL075W	8	16	19	11	12	8	9	16	6	9	14
MIA40:YKL195W	87	232	221	204	122	116	134	120	74	103	60
UBP12:YJL197W	84	266	237	158.772	76.2369	77.9705	54	97.0552	72	101	69
YNL277W-A	2	6	9	5	3	0	0	4	2	2	0
MSS51:YLR203C	95	226	238	235	81	71	60	95	82	114.959	72
LAP3:YNL239W	175	434	510	503	156	142	79	139	196	136	141
AIM7:YDR063W	10	51	63	52	15	21	15	21	22	28	15
SRL2:YLR082C	15	65	56	54	19	14	12	18	21	15	5
TPK3:YKL166C	16	21	30	14	16	4	5	16	9	8	7
YNR025C	5.01026	5.39755	6.51343	0	4.99176	0.170182	3.14304	0	1	3.149	4.12556
YLL065W	0	0	0	0	0	0	0	0	0	0	0
LRO1:YNR008W	41	141	137	92	56	36	31	69	35	58	34
MTC4:YBR255W	51	174	114.563	130	37	54	28	42	34	58	26
LEU4:YNL104C	598.592	1990.76	1940.54	1834.73	563.365	654.613	311.01	585.731	527.487	571.586	445.214
MSD1:YPL104W	39	85	84	77	33	33	24	35	31	32	21
RIT1:YMR283C	16	55	44	46	18	17	6	18	22	29	14
LAM4:YHR080C	171	595	487	450	141	256	107	203	174	210	88
RSC6:YCR052W	36	93	125	93	44	32	19	46	29	39	58
HSC82:YMR186W	764.275	1167.07	1375.36	1225.48	1316.17	1064.08	897.988	1402.78	905.787	1236.26	925.565
MBA1:YBR185C	11	31	39	47	13	10	8	26	6	6	14
VPS41:YDR080W	36	87	108	106	35	33	23	37	27	34	21
SPG5:YMR191W	37	90	105	129	34	25	35	48	34	38	24
IZH2:YOL002C	25	52	60	44	15	10	16	19	9	13	24
RAT1:YOR048C	53	166	189	127	75	63	61	141	56	84	82
RTT105:YER104W	2	9	15	17	9	8	6	15	8	6	5
QRI7:YDL104C	8	16	18	18.4356	6	6	1	6	6	5	7
AIM24:YJR080C	25	92	88	91	24	42	19	26	30	43	31
RSC1:YGR056W	42	152	140	109	67	59	45	79	64	76	46
PRP9:YDL030W	22	32	45	35	14	4	16	16	2	22	12
SNN1:YNL086W	2	15	25	10	2	3	0	8	2	2	3
YDR401W	0	0	0	0	2	0	0	0	0	0	0.891541
LMO1:YLL007C	18	79	94	86	25	19	16	31	29	18	16
NAM7:YMR080C	114	370	385	345	157	106	87	162	114	139	98
RPS17A:YML024W	93.7686	135	102	119	122	57	86	154	75	82	258
YGL204C	1	3	8	7	1	0	2	3	1	3	0
PTP1:YDL230W	18	70	60	43	16	18	22	22	17	14	11
UPS2:YLR168C	8	23	32	23	12	8	15	15	20	9	13
ARV1:YLR242C	8	9	14	10	3	5	5	6	5	4	7
YFR010W-A	0	0	0	0	0	0	0	1.85337	0	0	0.163246
MEP3:YPR138C	80	298	332	273	97	44	56	54	89	87	51
HIR2:YOR038C	43	109	160	130	37	37	30	43	31	49	39
LIN1:YHR156C	7	19	15	15	0	10	6	17	7	12.0566	5.04858
YSH1:YLR277C	38	78	91	100	20	27	23	36	26	30	30
SYN8:YAL014C	30	100	83	94	31	34	16	40	25	25	13
BUD2:YKL092C	74	257	245	222	79	65	54	96	68	96	44
YJL215C	4	12	16	11	4	10	8	5	1	3	3
YOR282W	0	0	0	0	0	0	0	0	0	0	0
tR(UCU)B	1.08045	0.25	0	0	0	0	0.348641	0	0	0	1.08233
NVJ2:YPR091C	90	293	233.751	242	103.427	114.27	79.5141	102	75	124.237	76.4563
YML119W	8	74	47	57	13	11	7	20	14	8	13
PSY1:YKL076C	0	18.3438	9.84649	12.4705	0	1.97415	0	2.73033	2.4963	1.95358	0
GUA1:YMR217W	71	81	51	89	200	101	114	304	54	151	206
YLR046C	15	56	45	60	9	5	6	11	16	16	7
RPL32:YBL092W	96	252	178	218	222	93	159	329	139	548	453
YDR316W-A	201.294	424.519	405.202	369.744	132.322	88.6395	63.6911	355.605	88.1178	105.978	219.133
CLF1:YLR117C	51	160	116	110	65	49	43	63	41	62	40
GLR1:YPL091W	120	308	320	243	110	139	95	155	132	169	90
MCM5:YLR274W	35	111	186	134	35	29	24	55	35	53	30
YFL019C	2	1	4	1	1	0	2	0	1	1	2
AIF1:YNR074C	23	69	74	59	30	23	9	31	0	23	30
SLH1:YGR271W	166	572	580	533	161	182	83	193	112	214	132
YPL025C	3	0	3	1	1	1	0	0	1	2	5
SAP30:YMR263W	15	29	24	20	6	9	14	9	6	11	6
YLR154C-G	1428.41	0	0	0	8525.04	23512.6	0	0	0	0	0
GYP6:YJL044C	59	116	150	160	51	55	45	56	35	66	53
MED6:YHR058C	8	30	41	29	11	5	7	12	6	8	18
WIP1:YDR374W-A	3	2	13	5	5	2	1	6	3	1	3
YBL113C	78.6721	263.994	331.628	161.117	43.8383	139.307	55.6274	84.2502	71.5185	96.5011	39.0682
CKB2:YOR039W	39	101	123	130	46	32	29	40	28	38	27
CRC1:YOR100C	21	44	26	36	10	6	16	12	7	13	5
PPR1:YLR014C	4	15	22	16	7	2	1	15	5	6	10
IST3:YIR005W	0	9	4	11	4	8	5	4	6	4	1
YPR016W-A	1.07867	0	4.23885	1	0	1	1	2.1872	0	0	1.13201
YOR1:YGR281W	351	1091	991	830	255	401	152	278	475	359	121
YHR219C-A	0	0	0.0674871	0	0	7.49663	0	0	0	0	0
MNT3:YIL014W	70	123	133	120	45	45	35	62	29	59	27
PYC2:YBR218C	815.106	2213.97	1788.37	1739.36	583.369	710.113	300	652.125	447.526	641.383	466.348
ALG5:YPL227C	14	50	52	56	29	26	19	31	15	16	16
YGR137W	7.73033	39.1792	32.9616	32.3788	16.7412	15.9137	8.67357	14.9795	15.0988	7.01436	8.37076
SEO1:YAL067C	211	861	1246	1133	154	52	21	141	214	0	21
MCM4:YPR019W	45	194	231	153	65	61	39	90	64	62	44
UTR4:YEL038W	39	79	87	83	29	41	17	28	26	32	22
RFC1:YOR217W	45.9172	181.186	168.754	114.471	75.1554	51.8222	47.2286	84.3809	53.7477	70.752	50.3081
PAU21:YOR394W	0	1	2	2	0	0	0	1	0	0.5	0
ASG1:YIL130W	32	105	129	96	54	47	15	62	30	38	58
ASR1:YPR093C	12	34	50	38	12	20	14	12	13	20	15
QRI1:YDL103C	41	78	128	85	41	46	33	32	45	39	37
EEB1:YPL095C	41	70	87	78	15	19	8	25	21	11	21
NUP53:YMR153W	23.0146	57.3412	95.1655	71.5729	27.3974	17	14	42.2054	22.4843	23	26
YLR112W	7	14	19	14	5	5	1	7	4	2	7
SPP381:YBR152W	9	31	22	16	9	10	4	9	7	8	12
PRP4:YPR178W	28	85.9995	59.5693	73.2178	21	13.6792	18	22.8557	18	25	10
YBL083C	2.37341	0	0	0	0	0	0	0	0	0	0
YBR191W-A	0	1.20235	0	0	0	0	0	1	0	0	2
YDR215C	12	28	18	14	20	16	13	19	10	23	6
CLB5:YPR120C	21	52	68	49	18	7	10	11	9	11	8
YER068C-A	1.98671	4.05849	12.2302	7.56908	1.78131	0	1.74267	2.70282	4.77064	5.06093	0
FLC1:YPL221W	199	506	631	517	194	162	142	253	133	232	148
YAP1801:YHR161C	104	508	356	361	107	134	82	133	124	158	98
NCB2:YDR397C	14	28.86	32.4919	24.6521	10	15.102	8.80165	23	7	8	4.70368
AEP3:YPL005W	13	67	55	68	28	27	18	19	20	25	19
YGL052W	3.42344	8.53322	2	9	2	1	1.63974	3.42344	1	1	2
GFD1:YMR255W	25	49	67	51	17	11	19	18	15	12	16
SPR3:YGR059W	2	4	3	5	0	3	1	2	3	3	2
APC9:YLR102C	18	42	47.939	37.6891	9	7	6	14	8.5096	18	7
tI(AAU)E2	0	0	0	0	0	0	0	0	0	0	0
KSP1:YHR082C	195	967	893	734	210	220	132	273	293	304	127
MTC7:YEL033W	10.7161	11.2083	14.4498	12.9226	5.29195	4.7239	6.77919	11.7117	6.54813	5.35592	7.8802
tT(AGU)I2	0	0	0	0	0	0	0	0	0	0	0
YIL077C	65	140	126	144	37	37	48	58	43	63	39
YDR053W	1.73789	17.0078	32.8492	15.8593	15.4124	3.93761	2.62619	20.7755	2.67384	13.356	5.61706
RNY1:YPL123C	32	99	107	124	22	30	22	21	34	34	10
IMG1:YCR046C	23	66	71	80	20	28	25	20	12	32	18
YEA6:YEL006W	27	101	104	109	32	12	18	26	29	34	26
MUS81:YDR386W	11	44	50	32	10	8	11	31	3	13	12
YPL264C	21	74	106	94	10	6	4	14	15	11	10
YIP3:YNL044W	9.33022	47.7838	40.8913	39.1423	22.0886	12.9447	7.0073	40.3449	32.0607	18.6107	21.0553
TOF2:YKR010C	22	85	111	75	34	23	14	53	23	30	21
LSM1:YJL124C	26	56	57	50	24	22	13	30	17	21	23
VTH1:YIL173W	82.6175	246.531	195.417	148.221	0.00011007	104.668	96.8106	0.210549	103.775	89.8506	0.00980445
COX11:YPL132W	17	62	61	60	19	14	21	26	13	16	20
YET2:YMR040W	7	9	10	9	2	3	2	3	2	3	2
YIL054W	1	4	0	1	2	0	1	0	0	0	0
NPC2:YDL046W	89	295	218	255	80	115	61	103	65	131	57
SUR2:YDR297W	59	139	207	157	99	60	60	87	41	94	92
YJR096W	91	183	133	218	32	67	46	29	35	54	15
RAD54:YGL163C	57	161	172	138	44	62	42	73	38	64	25
OST1:YJL002C	80	223	304	319	105	56	52	128	90	90	121
tS(AGA)D3	0	0	0	0	0	0	0	0	0	0	0
RDN5-5	108.782	3.91856e-06	84.9042	0.102508	0.046653	42.4398	30.7279	2.02185	0.00988302	9.32607e-06	44.1138
TMA16:YOR252W	2	9	7	2	0	3	4	6	3	5	4
YNL017C	0	4	4	1	1	5.11633	2	3	1	4	1
NEJ1:YLR265C	5	35	28	38	6	8	6	19	8	7	13
VOA1:YGR106C	60	115	167	159	46	29	38	66	42	55	81
YMR051C	74.0483	4.49133	0.0687018	0.786278	46.478	65.3028	0	0.379992	27.2956	39.487	0.0318419
TFC3:YAL001C	138	434	344	325	155	142	80	121	74	162	81
ATG16:YMR159C	0	0	0	2.34637	0	0	0	0	0	0	0
BAR1:YIL015W	187	465	916	496	132	149	108	193	5	8	9
SSD1:YDR293C	447	1738	1250	1213	540	638	391	612	453	693	334
HSP32:YPL280W	1	7.0042	4.15743	2.83946	1	8	1	1.5	6	0	0
ARG8:YOL140W	34	198	311	315	50	31	20	68	59	39	51
CHZ1:YER030W	40	64	113	49	33	43	18	28	14	23	19
MLC2:YPR188C	22	30	42	30	10	13	10	14	11	16	15
RPN8:YOR261C	51	109	163	128	45	37	71	80	44	51	44
POL4:YCR014C	21	59	51	42	29	12	7	25	20	20	13
YLR227W-B	5040.35	9483.17	6388.96	6825.99	3571.04	2224.76	1647.26	10011.6	40.6372	3397.73	7133.52
HGH1:YGR187C	4	17	20	15	12	9	8	11	4	8	12
ACS2:YLR153C	193	655	743	648	348	255	173	369	442	380	246
RBG2:YGR173W	4	19	18	18	5	10	18	18	3	14	16
DUO1:YGL061C	5	15	16	19	5	4	7	9	10	6	4
RTR2:YDR066C	6	14	21	12	7	5	1	4	3	3	3
KRE6:YPR159W	202	468	652	593	214	135	140	247	175	238	196
YSP3:YOR003W	16	49	58	46	14	16	11	20	19	18	14
YBR121C-A	1.33712	0	0	0	0.000462501	3.15275	1.24722	0	0.863877	3.31476	0
NIS1:YNL078W	51	154	185	140	48	37	51	42	41	59	39
REV7:YIL139C	8	11	15	18	4	4	9	3	4	5	10
SEC16:YPL085W	273	852	732	562	357	422	169	462	233	428	269
CIS3:YJL158C	134.357	443	557.476	536.356	277.832	163.428	203.383	310	136	259.348	345
FUN19:YAL034C	68	388	138	247	46	96	56	66	53	115	37
YML089C	0	10.908	3	4.29292	4	6.55795	1.08433	2.11061	3	4.36836	1
NPR3:YHL023C	39	125	142	102	49	45	24	76	65	65	34
RPN5:YDL147W	153	382	422	420	141	117	126	172	149	200	81
YNL165W	11	25	37	21	12	7	9	13	7	7	10
YLR297W	28	37	41	25	11	13	10	18	15	14	16
INA17:YPL099C	9	15	26	23	8	5	6	1	7	14	6
BCK2:YER167W	36	147	129	105	60	53	36	57	43	65	45
YMR119W-A	4.8382	4.29264	14.372	11.0096	3.89015	2.09389	0	1.6382	0	2.65551	2.76522
YEL014C	3	3.10118	10.6016	5.20041	6	2	0	3	3	2	4
SME1:YOR159C	5	12	9	9	6	4	6	4	3	7	7
SLC1:YDL052C	56	110	118	84	51	35	34	64	27	45	56
MRPL27:YBR282W	16	36	37	31	14	14	5	5	18	9	4
HFI1:YPL254W	21	51	74	71	21	15	13	25	19	16	16
EPS1:YIL005W	54	170	175	140	63	45	52	62	72	92	49
CSE4:YKL049C	7	34	44	29	12	10	12	7	7	16	8
SBE2:YDR351W	38	141	146	134	52	38	39	66	43	59	36
YDR261C-C	0	0	0	0	0	0	0	0	1.86235e-06	0	0
ATG8:YBL078C	33	46	53	56	16	51227	26	20	27	15	7
PUP1:YOR157C	68	185	213	168	69	32	36	72	56	78	54
YKL023W	51	110	111	65	33	41	22	31	23	20	21
RBA50:YDR527W	32.9437	68.9481	120.242	71.1324	34.6926	24	33.5141	57	10.5324	29.4229	43
BUD3:YCL014W	58	287	258	176	109	66	38	117	73	93	91
YDR015C	0	0.126579	0	0	1	0	0	0	0	0	0
SRB4:YER022W	39	89	92	120	39	38	31	41	32	38	23
MHF2:YDL160C-A	1	2	4	7	4	4	1	4	3	5	0
TRM44:YPL030W	10	27	34	31	8	4	9	18	12	5	18
GNP1:YDR508C	156	695	459	551.538	328.046	214.451	312	480	153	418.329	260
RPL14A:YKL006W	60.8642	161.852	90.0403	107.037	154.55	91.4483	109.594	235.07	82.0095	98.0719	263.844
YER138W-A	48.3546	42.7245	34.7747	34.0415	17.5656	12.4586	12.0538	26.3418	9.28594	25.3686	31.8574
UPC2:YDR213W	24	67	136	67	24	22	9	49	26	22	29
YMR247W-A	7	15	15	19	6	5	7	3	4	2	1
YER078W-A	0	1	1	1	0	0	3	1	0	0	0
TIM10:YHR005C-A	36	70	73	83	22	24	57	53	32	37	35
NVJ3:YDR179W-A	11	16	35	25	6	4	2	8	7	9	7
EXO84:YBR102C	33	167	137	124	43	28	31	47	31	49	23
YDR249C	10	25	22	48	9	4	12	13	13	6	8
DSF1:YEL070W	15.8667	38.0938	9.33333	33.7838	5.55556	12.7059	7	5.71429	4	10.8182	8
VMA6:YLR447C	64	222	262	291	124	84	86	174	113	129	152
SAP155:YFR040W	174	411	312	387	161	221	105	191	139	190	127
SGS1:YMR190C	102	308	218	220	108	73	64	136	65	123	66
FRE1:YLR214W	30	54	74	60	20	20	21	32	12	23	20
PAT1:YCR077C	117	603	520	470	204	268	157	195	136	226	124
GIR2:YDR152W	32	50	49	59	25	24	11	26	12	24	28
CBR1:YIL043C	63	105	155	143	71	45	64	96	56	41	106
ARP8:YOR141C	88	278	253	189	114	100	83	94	78	101	65
TMA20:YER007C-A	14	12	21	21	12	11	13	16	8	16	14
EFB1:YAL003W	198	231	307	298	326	190	189	407	178	219	481
OAF1:YAL051W	68	190	178	146	61	49	47	78	61	79	41
YEL032C-A	0	1.53648	0	0	0.988585	0.26711	0	0	3.01551e-07	0	0
SGT2:YOR007C	222	282	381	303	189	208	156	242	170	200	152
YER067C-A	0	3.61368	0	7.61872	0	0	6.41254	0	0	10.295	0
YCR081C-A	0	0	7.89626	1.08899	1.33543	2.0549	0.217631	0	1.4756	2.37583	1.83699
RIM4:YHL024W	44	143	123	145	53	52	38	60	40	68	23
CBP2:YHL038C	38	108	106	78	35	36	17	39	37	34	24
HCS1:YKL017C	20	49	46	49	16	10	14	24	11	22	25
MPS2:YGL075C	13	38	46	39	13	13	8	12	12	10	6
YGL108C	4.3184	14.1545	5.37869	7.06796	3.46373	5	2.22325	3.09634	1.98872	4.73585	3
YFR052C-A	69.2685	256.413	111.377	280.165	34.9219	35.6402	65.7497	43.9592	24.717	102.179	14.1301
YFR035C	6	9	16.6428	2.60192	7	1	2	10	3	2	6
SIT4:YDL047W	50	110	155	114	54	53	16	72	53	58	41
FUB1:YCR076C	22	32	56	38	10	17	19	13	8	7	13
EMP46:YLR080W	26	67	40	57	9	46	14	8	8	24	8
MAD2:YJL030W	7	23	18	20	7	3	4	11	5	7	6
EAR1:YMR171C	103	275	331	281	80	53	63	70	65	72	31
YDR042C	4	6	2	2	6	3	2	2	3	3	6
FLC3:YGL139W	23	136.157	144	121	58	25	35.0937	65	41	64	43
APL5:YPL195W	83	215	243	265	96	98	72	106	70	112	50
PLB3:YOL011W	73	309	340	240	129	105	102	133	91	137	111
SNF6:YHL025W	59	154	134	93	47	65	42	60	44	47	54
IME1:YJR094C	2	11	3	2	1	1	4	5	2	5	3
PRP8:YHR165C	225.784	841.562	753.115	675.213	309	350.872	203.951	399.138	228.04	394.63	243.983
YHR139C-A	8	10	8	13	1	0	3	5	2	4	1
HXT15:YDL245C	24.532	67.2648	81.6862	46	19.2592	21	5	23	21	19	6
PAU9:YBL108C-A	0	0	0	1	0	0	0	0	0	1.34844	0
YDL114W	0	0	0	3	0	0	1	0	0	0	0
MRN1:YPL184C	71	269	262	222	84	87	71	113	57	117	82
RTS2:YOR077W	6	22	18	16	7	10	3	8	2	6	7
SLZ1:YNL196C	5	11	11	16	3	8	5	5	4	12	3
UBX2:YML013W	59.9987	152.638	192.645	157.865	56.7783	67.0626	45	57.5407	41.8998	59.1012	29
YCL021W-A	40	69	61	51	31	15	19	63	1	26	50
NSG1:YHR133C	21	40	51	56	16	9	9	18	15	19	28
FLO8:YER109C	25	96	105	75	47	28	19	35	32	27	31
LSM4:YER112W	6	36	40	23	10	6	11	11	6	14	8
SEC17:YBL050W	76	128	174	169	56	50	39	78	46	59	44
SMX3:YPR182W	5	22	21	18	12	6	11	12	6	8	5
EFM6:YNL024C	5	8	7	9	5	1	5	5	2	8	9
BUD25:YER014C-A	8.65698	2.08437	0	0	0	0	0	0	0	0	0
PGA1:YNL158W	15	31	44	23	6	3	13	9	8	7	9
PET111:YMR257C	40	91	75	107	20	28	22	36	31	33	20
YJL022W	0	3.09563	1.53181	0	0	0	3.21581	4.025	0	2.24797	0
CGR1:YGL029W	3	3	9	2	3	5	2	2	1	3	3
RRP9:YPR137W	10	21.7523	57.5082	18.7732	11.1693	12	7.44911	24.6674	9.4279	18	33
PDR5:YOR153W	562	1381	2144	1834	893	494	388	1118	377	570	911
OCA2:YNL056W	12	33	46	45	10	11	6	23	11	14	17
tV(AAC)M2	0	1	0	0	0	0	0	1	0	0	0
SNU66:YOR308C	7	36	42	21	14	8	10	18	9	11	12
YLR159C-A	126.434	86.677	77.6802	71.3785	82.351	127.008	75.4685	48.5437	73.9241	43.1308	73.1223
CTH1:YDR151C	19	70	91	90	41	27	19	33	56	46	24
GPX2:YBR244W	8	22	43	29	13	4	3	22	3	7	12
CDC65:tQ(CUG)M	10	0	0	0	1	0	4	0	1	0	0
SCW10:YMR305C	81.7868	338.815	389.856	257.744	153.534	171.775	159.322	256.637	106	231.306	157.31
ARP5:YNL059C	56	154	162	102	63	71	24	73	59	78	33
YBL053W	1.98543	3.43639	0	0	1.00123	1.62362	0	1.41478	0	0.36894	1.69301
LST4:YKL176C	99	235	325	283	114	86	62	149	66	105	84
IML3:YBR107C	6	44	54	44	18	13	6	20	18	21	13
YHC1:YLR298C	4	39	36	32	13	12	7	23	7	18	11
AEP1:YMR064W	30	100	129	106	20	28	22	35	30	32	31
tV(AAC)H	7.99911	1.01295	0	2.48354	0	0	0	1	0	0	0
YBL107W-A	1.73076	1.54405	0	1.86304	2.55484	2.83954	0	2.29063	4.07782	0	1.61248
RAD5:YLR032W	33	150	142	154	48	38	27	44	30	35	23
YPR089W	63	164	195	154	82	54	36	91	59	73	39
BRR1:YPR057W	16	72	59	54	13	11	11	20	15	17	20
ERB1:YMR049C	19	22	25	23	35	33	28	58	24	35	75
TRI1:YMR233W	9	12	8	19	7	3	1	11	2	5	1
HSP42:YDR171W	292	1075	601	875	353	406	298	284	433	439	154
YEL030C-A	0	4.92297	9.78476	1.78491	0	0	0	2.46621	2.28321	0	2.44722
YPL039W	7	42.8734	29	32	2	9	18	12	2	22	14
CWH41:YGL027C	134	355	358	333	179	142	82	159	98	146	93
YGL041C-B	0	1.17053	0	0	0	0	0	0	0	0	0
APP1:YNL094W	102	230	229	225	47	77	38	83	58	75	47
YCL076W	0	0	1	2	1	0	0	0	0	0	0
DIM1:YPL266W	16	16	19	9	16	8	8	24	11	19	30
BAP3:YDR046C	73	675	369	527	251	121	192	284	154	379	136
MDM38:YOL027C	125	235	190	218	86	89	42	104	76	75	80
YNR064C	0	5	5	7	2	1	0	8	2	1	2
CCP1:YKR066C	190	399	356	301	116	159	97	97	108	99	104
tK(CUU)M	0	0	0	0	0	0	0	0	0	0	0
GPA2:YER020W	82	313	252	297	128	105	99	92	109	130	58
BUD16:YEL029C	9	28	42	34	10	11	5	12	12	8	18
tT(AGU)B	1	0	0	0	0	0	0	0	0	0	0
YNL097W-A	3.12008	2.87075	6.19232	1.56362	5.76496	5.97762	0	0	0	2.9289	4.0779
MRI1:YPR118W	22	55	66	63	34	20	24	52	27	23	44
INA22:YIR024C	13	17	25	21	9	8	20	5	5	9	5
NCE102:YPR149W	288	851	676	893	257	353	208	296	167	334	156
TPP1:YMR156C	7	15	20	16	4	2	3	6	5	2	3
YKL102C	1	4	9	4	0	2	4	2	4	4	1
EGH1:YIR007W	25	100	112	99.3967	39	25	21	37	36	42	14
YDR034C-D	242.764	466.65	345.748	361.138	129.415	185.01	59.8665	268.164	148.264	92.0584	156.548
STT3:YGL022W	216	701	712	528	331	187	148	344	208	271	234
SWM2:YNR004W	5	13	19	24	4	3	3	4	6	6	4
CAR2:YLR438W	77.1402	159.969	135	152.374	58.2438	101.476	42.6742	47	31	68	32.4303
ARG2:YJL071W	24	94	84	107	23	13	11	31	29	20	18
CTR1:YPR124W	9.04983	26.5118	49.3167	23.7519	23.4562	10.9852	8.98045	26.4182	15.8161	10.5798	11.8579
YNL040W	49	49	94	93	24	24	21	43	43	32	31
COQ11:YLR290C	21	62	75	57	9	14	12	14	13	18	13
RRP36:YOR287C	6	2	0	0	2	1	4	2	4	0	5
YMR105W-A	1	5	5.95573	11.4134	0	1	5	2	3	2	1
YHR214W-A	6.28571	34.3636	19.6	25.3996	5.5	22.0351	15	16.5	10.0598	8.66667	5.66667
ROX3:YBL093C	31	38	51	57	15	19	11	34	25	18	17
ARL1:YBR164C	33	69	71	71	31	16	33	31	15	23	32
YDR524W-C	85	165.33	191.763	155.056	190.543	46.3118	77.4371	104.93	61.9287	73.3953	104.148
tP(UGG)Q	0	0	0	0	0	0	0	0	0	0	1
YIL086C	3	2	1.10817	1.09406	0	0	3	3	0	0	1
API2:YDR525W	2	3	3	1	2	4	0	0	0	1	0
RSC30:YHR056C	39.5796	194.433	164.137	191.254	54.4429	47.9297	46.7806	94.1017	46.6032	101.137	57.7076
MAL31:YBR298C	207	855	352	645	189	253	224	218	94	372	90
MLH1:YMR167W	21	81	87	76	24	22	23	42	36	33	10
HCR1:YLR192C	48	141	129	106	71	64	50	89	47	70	59
SCD5:YOR329C	71	302	235	194.548	81	114	50	100	73.7955	107	51
QCR9:YGR183C	20	48	34	44	12	10	11	14	8	18	17
YGL102C	18.6234	41.4019	52.1964	64.5921	27.8132	21.9306	9.13795	25.2523	6.03627	19.8826	29.5051
RPB5:YBR154C	17	41	53	36	19	19	18	23	21	23	34
NCR1:YPL006W	165	472	541	579	139	196	129	180	176	185	88
AIM25:YJR100C	16	53	40	50	12	9	11	18	10	12	17
RAD55:YDR076W	23	38	48	39	14	9	7	8	8	8	8
IKS1:YJL057C	54	129	160	139	32	49	35	42	47	62	18
YAL047W-A	0	2.64247	0	0	0	0	0	0	0	0	0
MGA1:YGR249W	36	208	87	141	80	78	84	106	114	95	41
SNR191:snR191	774	1586	1745	812	1140	608	900	1327	2828	1548	1440
IRC16:YPR038W	1.66807	1.65686	0	0	0	0	0	0	3.83625	0	0
ERR2:YPL281C	7.82353	16.8889	14	0	9	0	4.5	8	5	7.85714	2.1
HAT1:YPL001W	21	29	33	39	13	4	4	14	9	11	10
SUF10:tP(AGG)N	0	0	0	1	0	0	1.11111	0	1.33333	2	1.14286
PRM7:YDL039C	13	36	34	17	37	34	16	56	11	32	65
YOL013W-A	0	3	1	3.12791	0	1	0	1	1.14348	1	1.08364
SKN7:YHR206W	39	91	91	87	31	39	23	67	34	44	33
tD(GUC)L2	0	0	0	0	0	0	0	0	0	0	0
tL(UAG)J	0	0	0	0	0	0	0	0	0	0	0
FBP1:YLR377C	12	22	30	25	7	7	4	11	6	15	8
SNZ3:YFL059W	7.2	19.4286	15.6522	6	8	12.8571	6.22222	10	2.25	11.3333	8.25
COQ10:YOL008W	9	25	32	40	5	2	3	9	6	5	3
YLR154W-E	18369.9	26029.7	29736.8	15945.9	35568.8	22816.2	19995.4	54159.5	33484	37685.5	69188.2
RBD2:YPL246C	34	118	110	108	23	32	40	44	35	39	47
SRP40:YKR092C	10	18	23	11	23	8	19	56	13	26	52
NTH1:YDR001C	484	1331	1264	1272	348	552	258	347	391	493	196
YJL195C	0.0509652	7.21745e-06	0.00385682	3.20199	0	0.320449	1.49157	0	1	2.04984	2.44129
YMR194C-A	0	3	4	3	1	0	1	1	0	3	0
THR1:YHR025W	58	128	189	132	101	39	24	88	60	76	95
YHR056W-A	3.96514	17.0928	21.408	13.7462	15.6303	15.0703	2.2548	13.4941	6.71838	0.863388	0.607881
KGD1:YIL125W	308	866	855	863	312	367	222	390	282	392	172
DYN2:YDR424C	11	12	17	13	6	1	9	7	7	4	4
INM2:YDR287W	18	59	79	34	14	20	20	17	18	18	9
EGD2:YHR193C	80	194.781	197.887	166	146	97	97	152.945	75	139	183
RMT2:YDR465C	7	11	12	10	13	6	9	21	5	14	23
tQ(UUG)D2	0	0	0	0	0	0	0	0	0	0	0
RNA1:YMR235C	71	128	204	178	93	63	72	96	59	79	89
YMR265C	25	81	95	72	43	24	21	39	47	36	42
RPL24A:YGL031C	79.5163	161	125	144	220	153	112	189	86	124	248.551
GRR1:YJR090C	79	254	313	275	103	89	82	125	86	112	80
GPN2:YOR262W	22	37	43	36	18	15	14	26	13	9	19
YLR358C	9.88508	43.8284	30.4146	31.4115	11.2438	2.04307	7.16346	7.86148	14.2091	9.1726	9.08659
MYO5:YMR109W	172	614	528	505	220	239	175	285	207	253	156
RVB2:YPL235W	48	199	175	170	60	64	54	96	54	66	63
YML040W	341.533	413.133	210.578	713.328	299.888	25.5323	143.054	843.616	12.2676	238.57	349.703
ATG27:YJL178C	17	56	62	39	18	16	15	23	20	26	24
tK(CUU)P	0	0	0	1	0	0	0	0	0	0	0
DFG16:YOR030W	45	181	162	139	44	54	40	54	45	55	34
ECM18:YDR125C	19	38	48	49	9	19	14	11	13	18	10
RAV2:YDR202C	20	46	96	90	17	22	10.9245	32	17.441	30	9
ESA1:YOR244W	16	52	58	64	18	14	16	29	15	18	12
YBR242W	9	18	30	16	5	3	6	20	13	15	14
PHO3:YBR092C	12	28	47.7705	38	18	20	25	44	20	25	60.7407
AMD2:YDR242W	19	65.6417	89	75	19	14	19	25	36	21	23
VPS74:YDR372C	55	110	135	145	53	41	30	62	38	52	22
MTG2:YHR168W	18	71	56	51	13	16	9	20	16	20	14
THR4:YCR053W	152	479	331	373	209	129	86	238	135	196	207
MRPL33:YMR286W	12	19	23	19	10	15	5	7	6	12	8
tL(UAA)B1	0	0	0	0	0	0	0	0	1	0	0
YKL068W-A	44	236	269	184	35	28	10	27	51	28	17
YDL221W	4.44176	23.1204	15.825	8.61532	8.21046	14.5604	1.96745	9.17621	3.21437	8.53606	5
CHL4:YDR254W	47	111	133	134	25	26.2518	13	41	38	39	15
SUP3:tY(GUA)O	0	0	0	0	0	0	0	0	0	0	0
YOR231C-A	0	0	0	0	0	0	0	0	0	0	0
BXI1:YNL305C	76	205	184	211.72	45	82	44	49	42	68	19.3586
YPT1:YFL038C	82	247	265	193	113	84	95	111	80	99	95
YOR343W-B	315.893	592.769	493.643	518.705	158.924	187.561	138.065	433.214	287.961	247.971	378.77
GSP1:YLR293C	73	148	170	162	116	58	70	129	63	98	199
AFB1:YLR040C	1.82977	25.8004	30.3633	15.9835	10	6.71574	13.3852	6.69048	38.039	119	49.0367
RRP15:YPR143W	7	16	24	6.91345	9	6	15	8	9	9	16
YPR071W	14	23	39	25	14	5	9	16	5	3	5
HUA2:YOR284W	22	25	31	34	5	7	4	16	6	6	2
GSF2:YML048W	159	430	428	504	166	156	129	192	109	199	150
AIM41:YOR215C	36	142	106	110	32	36	43	28	36	36	23
NRK1:YNL129W	5	16	39	33	12	7	3	7	11	3	14
IES2:YNL215W	50	113	86	91	35	81	30	34	25	47	24
LGE1:YPL055C	48	106	121	91	48	38	29	36	44	32	46
SRP68:YPL243W	33	149	175	179	74	38	46	75	56	68	56
COG5:YNL051W	14	31	43	56	5	10	15	12	14	12	17
YOR073W-A	1.17058	0.781671	0	0	0	1.68751	0	0	0.490246	0	0
LCL1:YPL056C	14	64	57	52	22	31	19	20	20	16	11
YTA12:YMR089C	118	330	349	276	141	137	96	142	126	154	64
RFS1:YBR052C	114	257	246	309	70	104	124	64	60	96	68
ABZ1:YNR033W	76	261	220	204	69	85	46	83	82	86	54
PEP3:YLR148W	47	106	108	106	51	52	30	53	36	57	28
TGL4:YKR089C	282	838	730	800	263	313	205	268	104	288	136
MET7:YOR241W	51	94	120	115	44	33	33	57	21	28	36
RDR1:YOR380W	12	39	40	62	19	18	7	22	18	18	16
PAU6:YNR076W	5.33871	10.6436	13.6764	8	2.5	1.77526	1	2	0	6.65156	1.5
SOE1:tE(UUC)G1	0.364839	0	0	0	0	0	0	0	0	0	0
YFL032W	0	0	0	0	0	0	0	0	1.04619	0	0
tT(AGU)J	0	2	0	0	0	1	0	0	0	0	0
PST1:YDR055W	121	212	372	212	59	93	59	59	80	88	41
YGL176C	13	56	55	46	16	11	12	27	12	19	15
AVT6:YER119C	64	208.929	234.773	174.917	61	58	43	57	58	53	48
PAM17:YKR065C	37	57	53	68	21	19	25	29	15	26	19
YDR149C	10.3437	47.1898	16.0985	2.62044	14.3796	0	0	30.1099	21.3303	15.3524	8.9918
UTP7:YER082C	32	31	42	22	19	27	13	34	13	20	38
PRS1:YKL181W	74	96	112	103	94	46	69	109	34	65	119
PMT1:YDL095W	218	716	792.288	663.969	307	267	201	374.414	257	406	234.179
TVP23:YDR084C	9	30	38	21	16	4	4	10	16	8	9
MEI4:YER044C-A	1	7	4	15	4	1	1	11	4	3	2
FPR1:YNL135C	103	132	574	137	88	88	108	103	54	83	141
CDC34:YDR054C	50	151	143	126	65	48	48	51	68	64	30
GIT1:YCR098C	6	6	16	11	4	3	1	4	9	5	2
YDR182W-A	0	2	2	2	0	0	0	0	0	1	2
YIH1:YCR059C	19	40	45	33	18	19	5	35	12	13	26
MNN10:YDR245W	28	110	157	126	46	33	31	46	50	57	43
UBP7:YIL156W	92	275	207	166	59	90	41	87	48	79	34
tI(UAU)L	1.5	1	1	0	3	0.5	3	0	0	0	2.4
YLR283W	3.03235	25.0215	22	25	6.09335	3	8	15	5.80214	12.4207	5.96927
PCL6:YER059W	26	106	119	113	40	45	31	43	45	40	17
COR1:YBL045C	141	562	363	438	108	174	127	127	164	203	67
YDR061W	60	161	167	165	43	39	29	63	50	48	30
CMS1:YLR003C	7	8	9	2	6	2	5	8	5	6	15
MRX5:YJL147C	15	31	34	32	15	8	2	12	6	8	5
tW(CCA)P	0	3	6	3	4	0	2	4	2.66667	4.66667	4.66667
JJJ1:YNL227C	6.96549	15.9405	27.3231	23.4375	6.97684	13	1.71056	15.4098	10.077	21	10.293
YNL018C	27.3	36.3448	52.9747	31.6098	51.6522	51.75	24.1818	58.2192	20.25	59.3731	25
YOX1:YML027W	24	127	124	85	17	12	4	23	19	14	11
YLR466C-B	1	17.6199	13.291	6.5542	8.856	10.5603	8.93063	13.2884	0	7.05059	8.31184
YIL108W	94	311	370	277	95	110	69	109	87	103	54
RRS1:YOR294W	2	6	6	3	11	5	4	11	3	7	13
ERP4:YOR016C	13	24	36	41	17	6	13	25	10	10	10
YML122C	6	12	20	9	3	1	1	4	0	2	4
LSB5:YCL034W	90	241	242.753	207	67	75	82	77	68	74	46.6907
TOS6:YNL300W	30	144	156	98	31	42	46	50	28	68	34
APQ12:YIL040W	4	18	13	16	6	1	4	3	5	4	7
YCR095W-A	8	7	14	16	2	0	2	9	5	2	3
TAH18:YPR048W	10	24	45	30	12	8	6	25	13	13	17
HOS3:YPL116W	85	335	265	350	100	91	68	81	71	96	51
URA6:YKL024C	20	38.8064	41.637	49	19	12	11	19	13	17	25.6775
ECM10:YEL030W	16	38.077	61.2152	58.2151	17	19	6	18.5338	9.71679	19	6.55278
COS6:YGR295C	76.9224	136.463	281.474	214.995	76.9996	51.2717	71.3538	70.1037	77.073	91.2951	83.3876
PRP3:YDR473C	15	51	57	47	20	22	9	22	16	24	14
YPL044C	0.628762	6.0159	1.22326	2.26793	0	0	0	0	0	0.091989	2.63161
APN1:YKL114C	18	55	68	28	27	13	14	34	16	27	20
INN1:YNL152W	15	75	73	55	21	16	20	18	14	27	19
SRP54:YPR088C	79	167.776	163.525	144	72.2862	62.5374	51.8967	92.7554	58.1148	86	76.7779
SWI3:YJL176C	58.373	169.366	224.444	154.817	68.4007	66.9457	41.759	85.944	61.8657	65.9254	38.1331
CDC11:YJR076C	48	146	169	123	66	42	40	78	42	67	37
SUP54:tL(CAA)G2	0	2	0	0	0	0	0.4	1	0	0	0.3
STP2:YHR006W	69	208	199	210	51	49	32	84	89	74	58
RSM18:YER050C	5	26	36	29	16	11	9	21	13	14	12
DBP5:YOR046C	12	62	114	62	45	25	50	64	39	44	62
RDN5-6	1725.83	0.000506474	544.467	0.385575	71.6692	452.142	100.71	51.5608	52.0746	55.3886	24.4534
YNL054W-A	81.4198	78.4999	73.1258	32.7264	0	12.9147	8.44262	51.9945	12.8017	14.912	63.8377
SPR1:YOR190W	6	36	21	30	8	10	6	7	8	23	3
RRN5:YLR141W	12.8668	42.7047	35.3477	23	25.2892	15.9105	13.9678	17.5254	8	16.1027	17.5503
YKL111C	0	0	4.56115	0	0	0	2.05566	0.969488	0	0.184753	0.825915
TOS3:YGL179C	8	51	43	44	19	16	5	19	10	15	13
YPS3:YLR121C	56	69	140	108	44	24	25.9134	59.4197	64.6434	33	45
SHU1:YHL006C	2	11	17	8	2	4	8	9	3	2	11
RCN1:YKL159C	23	19	39	33	15	4	7	11.1589	10	6	17
XRS2:YDR369C	14	51	74	49	18	18	16	18	14	32	9
PCL10:YGL134W	17	51	53	50	18	13	18	27	12	23	21
YMR030W-A	0	1.07743	6	6	1	0	2	0	0	0	1
YJR056C	4	38	28	28	12	9	3	8	6	9	10
YPR130C	0	8.30748	2.67405	0	0	0	2.96312	0	0	8.38117	0
PEP7:YDR323C	3	21	57	31	10	8	7	14	5	5	5
SPS4:YOR313C	0	5	2	7	0	1	0	1	1	0	0
YLR118C	27	55	74	51	17	9	9	32	15	20	18
CNS1:YBR155W	3	11	23	11	19	5	3	14	3	5	6
HER1:YOR227W	239	1061	855	856	254	326	149	237	218	353	124
tP(UGG)O1	0	0	0	0	0.111111	0	0	0	0	0	0
BET1:YIL004C	3	22	13	13	8	7	10	8	7	12	7
YLR157C-C	126.434	86.677	77.6802	71.3785	82.351	127.008	75.4685	48.5437	73.9241	43.1308	73.1223
YBL094C	2.13102	0	0	12.1561	0	0	0.0509026	0	1.6643	0	1.75702
LYS12:YIL094C	86	303	248	282	181	56	98	152	144	190	209
RGD1:YBR260C	36	97	110	87	46	38	32	41	31	49	33
NPL3:YDR432W	149.783	469.899	433.654	334.281	321.924	328.519	166.756	299.042	181.983	221.274	230.717
YDR514C	5	14	25	10	5	1	13	13	5	6	17
RMP1:YLR145W	5	17	16	14	8	4	7	4	5	5	2
SPC1:YJR010C-A	4	9	12	17	5	2	4	5	11	3	2
YEL045C	1	5.0747	1.00513	3.04007	1	0	0	1.02829	0	0	0
YGL177W	8	7	9	7	7	5	4	5	8	5	5
HOS2:YGL194C	35	81	112	106	13	25	10	30	21	25	22
RAX2:YLR084C	35	189	211	160	66	29	44	92	38	62	70
SRB2:YHR041C	30	55	70	70	39	22	13	34	17	20	41
NAF1:YNL124W	13	42	36	33	14	13	8	20	11	8	26
NNF1:YJR112W	13	19	40	14	7	3	2	5	4	5	7
RNH202:YDR279W	8	29	40	41	10	9	12	22	10	13	11
ORT1:YOR130C	54	154	135	159	26	9	18	13	45	14	20
RPS4B:YHR203C	116.55	215.006	207.962	263.671	260.032	136.218	162.109	319.222	137.763	202.977	358.485
FRQ1:YDR373W	25	51	47	51	17	14	9	18	18	18	12
YDR124W	8	50	50	28	9	16	11	14	17	18	11
YOR338W	23	14	24	17	9	15	2	5	6	6	14
tG(GCC)D2	16	3	2	1	0	2	0	0	0	0	2.33333
YML116W-A	7.00988	72.4635	72.3327	70.2547	3.23124	19.1327	17.939	12.7547	20.4812	19.4093	6.15205
QDR3:YBR043C	110	253	238	239	58	32	31	65	74	73	52
YPL283W-A	0	0	0	0	0	13.1992	9.70118e-07	0	0	0	0
TCD1:YHR003C	21	61	79	49	26	23	24	25	22	39	23
SUE1:YPR151C	5.92264	18.7162	24	13	0	3	6	5	11	6.83257	2
LTV1:YKL143W	7	14	11	8	21	14	19	33	8	25	17
SRL4:YPL033C	3	0	2	1	0	0	0	1	1	1	2
CWP1:YKL096W	78	355	524	348	118	111	55	201	125	135	63
GCD1:YOR260W	49	103	116	96	49	35	47	97	47	59	60
ERC1:YHR032W	83	182	184	140	69	86	30	98	43	62	56
ESP1:YGR098C	57	182	205	180	71	48	52	103	40	72	53
BIR1:YJR089W	40	89	101	89	26	32	16	33	29	35	36
YFL031C-A	88.7517	140.671	212.035	220.522	68.9639	58.149	59.2825	63.4589	57.2102	54.5477	85.9397
IVY1:YDR229W	66	151	127	134	48	49	33	42	35	62	28
YOL038C-A	1	2	4	4	1	0	0	1	0	0	1
FES1:YBR101C	49	102	124	110	89	52	53	68	120	81	72
YHR218W-A	1.10892	16.8523	13.8868	6.36077	6.7619	9.56564	2.68579	8.3298	3.0071	5.31642	2.91676
CAR1:YPL111W	10	47	32	80	27	31	24	30	9	49	21
PFS2:YNL317W	25	64.555	62	73	31	16	13	34.6464	26	31	15
JLP1:YLL057C	121	72	239	321	9	12	10	12	23	11	5
YHR177W	16	62	96	64	26	18	9	22	21	35	16
AGP3:YFL055W	221	523	701	680	52	42	26	65	66	62	18
CET1:YPL228W	39	105	107	99	46	31	19	48	25	57	28
PTC1:YDL006W	32	73	68	60	22	16	11	18	17	16	12
YGL214W	8.17898	6.17271	12.9194	3.26775	0.047642	0	0	3.94974	4.95111	5.45114	0
YER023C-A	1.1309	0	0	0	7.55448	4.50656	2.02636	0	0	0	0
MRPL9:YGR220C	27	48	46.9997	62	18	18	8.13679	18	24	18	16.1067
EXO1:YOR033C	49	93	111	130.297	43	45	19	53	39	55	34
SSY5:YJL156C	53.5365	167	159.471	124.567	49.5386	37	32.3892	48	43	63	38
URA3:YEL021W	1	200	0	0	0	0	0	0	38	0	0
SPS2:YDR522C	0	4	10	8	1	2	2	2	1	1	1
RPS19A:YOL121C	46	68	68	62.2897	88.7788	35	68.8	90.3061	52.3537	57	129.189
SDP1:YIL113W	25	37	52	50	10	34	19	19	17	19	11
PSK1:YAL017W	239	1047.85	811.72	879.876	331	344	235.893	322	258	400	146
YLR154W-F	4939.77	2820.55	4471.45	1037.43	10446.3	11428.7	2148.71	8872.65	2745.03	3894.45	10841.1
AIM46:YHR199C	45	163	183	152	30	43	42	43	50	49	49
YPK3:YBR028C	49	120.914	114	85	31	17	20	49.7847	24	38	40
YAL067W-A	0	0	1	0	0	0	0	0	1	0	0
MDM36:YPR083W	15	70	54	61	15	14	4	11	18	14	9
ERG9:YHR190W	137	536.678	438.921	455.851	140	123	86	163	186	136	81
YHR180W	4	26	19	23	2	7	2	8	4	14	3
YCR049C	6.07223	10.0925	11.0004	8.92909	8.91027	6.81962	3.14865	0	0	3.43326e-06	0
KRI1:YNL308C	31	38	48	34	30	45	36	74	20	35	54
YEL023C	13	48	56	34	13	13	5	25	9	26	9
YNL057W	0	11.4397	10.0242	6.99374	0	0	0	0	0	3.47832	0.64647
YPL080C	1	0	0	1	0	0	0	1	0	0	3
YJR061W	30	65	104	66	22	21	26	47	23	35	20
ARR3:YPR201W	9	26	41	27	8	7	4	10	10	13	7
RPS6B:YBR181C	131.892	250.239	222.441	207.258	280.508	258.969	165.286	498.634	138.504	215	325.852
SAC1:YKL212W	88	198	239	211	134	103	73	160	111	96	129
VCX1:YDL128W	122	249	291	251	83	94	90	101	80	116	83
SFT2:YBL102W	22	93	83	96	23	31	23	35	23	31	28
YHR214C-C	151.74	268.259	255.716	165.306	90.2154	0	14.6794	127.553	167.222	166.464	241.279
MUP1:YGR055W	805	4050	4114	3375	987	430	315	968	830	992	310
YNL338W	0	0	0	0	0	1.5298	0	0	0	1.84661	0
CMK2:YOL016C	132	397	331	365.92	162	120	126	142	193	174	82
TRM5:YHR070W	33.4096	79.6768	77.8	87.5765	36	29.1097	17.927	25	23.5233	32.7014	23.1245
ATP3:YBR039W	50	157	131	136	48	65	44	74	78	92	52
YFL064C	2.2716	4.10644	13.4157	4.45013	3.61159	0	0	1.92886	10.1113	0	2.44447
TAF3:YPL011C	20	52	71	70	17	15	19	25	11	27	14
PHO13:YDL236W	46	88	105	97	29	39	38	51	43	50	36
YJL026C-A	5.89257	0	0	0	0	0	0	0	0	0	0
YHL009W-A	10.5395	15.9702	3.98381	14.7894	10.0297	0	0	13.0799	0	0	1.96118
YJL156W-A	4.46348	17	16.5288	7.43286	1.46141	3	4.61083	3	3	1	4
tK(CUU)C	0	0	0	0	0	0	0	0	0	0	0
YOR105W	0	5.34123	8.87634	11.6577	1.41996	1.27198	2	1.80621	1.92831	1.23516	0
YJL127C-B	13	42	36	48	9	14	7	13	11	6	7
VPS69:YPR087W	0	3.22409	15.4753	0	4.71378	6.46263	8.10334	2.24462	2.88517	0	6.22214
AFR1:YDR085C	84	209	222	220	41	111	76	59	85	76	31
YPF1:YKL100C	126	408	427	565	128	130	104	141	92	178	88
DUS3:YLR401C	15	31.8538	39.5885	13	24.4184	22	15	37	13	30.5879	52.4409
YBL096C	3.17904	8.96931	7.50597	0	0	1.22773	0	1.77403	0	0	0
LIH1:YJR107W	19	79	93	76	38	30	12	37	27	44	18
YHR073C-B	0	0	0	0	0	0	1.41781	0	0	0	0
LSM6:YDR378C	10	24	43	42	22	5	12	14	4	18	5
NDC1:YML031W	50.9867	135.286	156.095	140.88	65	35	40	81	43	46	45.8677
TGL1:YKL140W	54	173	180	170	58	60	33	65	55	55	33
YBR096W	24	46	69	66	17	11	18	27	23	16	13
ISY1:YJR050W	9	44	25	39	12	14	9	14	11	13	7
YPR146C	4	7.41262	16.5159	17.9517	1	4.26918	4	4.41112	5	4	6.6399
YKL053W	0	0	1.57162	1.61521	0	0	0	0	0	0	0
CTA1:YDR256C	28	83	76	97	24	25	12	16	11	25	28
YCL041C	3.42499	6.45867	10.4499	6.30094	1.17208	1.14156	5.6456	1.09787	1.06303	0	1.13809
SUF17:tG(GCC)O2	0	0	0	0	0	0	0	0	0	0	0
tT(AGU)N2	2	0	0	0	0	0	0	0	0	1	0
YLR278C	87	358	344	250	113	123	56	137	107	158	76
YHR070C-A	3.59038	4.78324	15.4911	7.35945	0	4.89028	5.07304	4	0	6.07002	8.87554
RRG1:YDR065W	9	14	24	28	7	9	7	16	6	12	4
tR(ACG)D	0	0	0	0	0	0	0	0	0	0	0
YJL213W	52	289	201	222	74	104	62	54	96	74	17
VMS1:YDR049W	33	91	79	69.8897	33	41	27	43.605	21	29	16.3828
SPS18:YNL204C	6	13.6189	23	16	10	7	2	13	1	12	5
EUG1:YDR518W	37	89	118	123	40	47	28	53	28	49	44
RNA15:YGL044C	18	55	72	51	19	10	16	18	11	22	12
YER039C-A	3	14	9	16	3	4	2.44174	1	5	3.65823	4
THI7:YLR237W	31	94	87	62	32	20	23	55	27	33	23
YJL009W	7.81182	9.30433	19.2023	5.54126	12.0158	4.88694	4.53311	8.56842	6.16791	7.94892	4.13195
YBR085C-A	67	179	153	196	33	45	43	41	61	57	17
OST6:YML019W	10	25	52	52	17	6	12	18	13	21	23
tT(UGU)P	0	0	1	0	0	0	0	0	0	0	0
KRE5:YOR336W	90	242	264	304	83	62	75	122	87	114	75
RPR2:YIR015W	30	50	53	24	14	18	11	19	18	22	13
MRPL17:YNL252C	18	42	65	34	11	17	19	8	12	11	8
RPL30:YGL030W	64	135	110	130	128	72	94	152	81	79	232
PHO12:YHR215W	8.25	27.6923	39	50	20	14.4	4	28.2857	24	0	16
FPR3:YML074C	77	258	161	160	160	137	111	187	70	148	81
RPS24B:YIL069C	37.3786	115.294	81.326	86.8475	98.3661	45.2727	53.0503	150.643	52.02	59.0357	130.065
YPR064W	2	11	11	10	3	1	2	3	2	2	2
DIN7:YDR263C	19	43	39	39	18	24	8	15	13	15	16
OSM1:YJR051W	58	141	122	124	53	48	33	65	26	42	29
LSC2:YGR244C	246	463	591	464	184	150	133	170	105	177	114
GUP2:YPL189W	4	6	6	11	3	2	1	5	8	7	4
CHC1:YGL206C	762	1932	1810	1799	793	957	533	929	636	943	457
DOT6:YER088C	276	1065	828	676	348	363	167	337	197	497	177
KRE29:YER038C	15	27	23.101	28.1654	11	5	5	11	5	5	7
SPO75:YLL005C	21	82	79	111	22	31	17	24	27	41	10
ERD1:YDR414C	6	25	43	35	11	7	3	14	12	14	19
SIF2:YBR103W	36	127	110	93	39	33	19	22	28	41	17
RRP8:YDR083W	3	7	10	3	11	6	12	27	3	6	24
DXO1:YDR370C	7	31	32	33	8	2	9	18	10	7	15
LEA1:YPL213W	8	25	55	25	5	3	5	14	4	6	4
PSD1:YNL169C	44.7515	156.464	237.811	190.125	95.9494	52	54	106	137.354	81.0153	57.7471
UTP23:YOR004W	2	4	7	1	0	2	6	10	4	4	15
BCY1:YIL033C	123	479	311	367	135	198	117	99	133	197	79
LAT1:YNL071W	187	509	545	502	224	235	131	250	148	202	199
SRN2:YLR119W	3	31	33	25	10	5	11	12	13	13	3
YGR068W-A	0	0	0	0	0.8613	2.45873	0	0	0.251633	5.01979e-06	0
SLX8:YER116C	24	70	56	33	9	16	16	24	17	20	10
YGR151C	0.197335	0	0	5.35902	0	0	5.63092	0	3.32933	0.657064	0
tK(CUU)E2	0	0	0	0	0	0	0	0	1.25	0	0
ARP10:YDR106W	5	2	10	7	1	0	2	8	2	2	2
IMP3:YHR148W	1	5	1	6	1	1	1	7	2	1	5
Q0142	0	0	1	0	0	0	0	0	0	0	0
tG(GCC)B	0	1	0	0	0	0	0	0	0	0	0
RPL6A:YML073C	87	177	125	160	185	159	205	522	81	168	301
YDR445C	0	0	0	0	0	2.31535	0	0	0	0	0
FLO5:YHR211W	33.7783	164.835	152.769	131.564	42.3037	70.8976	35.7325	51.7619	45.9698	72.159	41.1746
SSK1:YLR006C	57	152	197	173	65	74	50	95	88	76	51
YFL015W-A	0	0	0	1	0	0	0	0	0	1	0
GLN4:YOR168W	114	226	201.462	197	171.121	138	145.687	248	95.0439	207.342	157.578
MON2:YNL297C	115.721	449.874	427.156	429.534	139	164.752	96.1972	217.683	133.692	216.237	96
YAR047C	5	16	18	14	12	11	2	5	0	13	8
RUF23	2	0	1	0	0	0	0	0	0	0	0
RGI1:YER067W	103.209	1015.2	233.371	1117.93	146.622	238.274	382.711	88.3809	106.883	412.752	44.2675
HMRA1:YCR097W	17	27	41	23	6	5	22	16	0	0	0
tS(AGA)J	0	0	0	0	0	3.02263	0	0	5.64508	0	0
VPS45:YGL095C	43	71	120	102	25	25	15	30	28	37	26
MDH1:YKL085W	95	325	243	388	89	158	103	87	82	143	61
WTM1:YOR230W	346	532	716	666	266	308	203	243	290	276	178
RPB2:YOR151C	278	814	796	658	338	305	181	466	304	331	258
OMA1:YKR087C	17	45	53	65	19	21	21	14	7	13	14
WAR1:YML076C	45	172	145	127	42	67	35	67	47	62	41
DRS1:YLL008W	21	36	23	10	23	26	25	74	16	51	54
SMY2:YBR172C	55	121	105	84	53	51	27	77	34	68	48
PIG1:YLR273C	16	35	48	29	12	11	8	9	5	17	4
RRT5:YFR032C	0	1	1	0	0	0	0	2	0	1	2
ATO2:YNR002C	40	121	90	137	25	30	16	31	38	40	8
MLF3:YNL074C	53	245	177	177	55	58	44	66	60	109	34
tD(GUC)G1	0	0	0	0	0	0	0	0	0	0	0
MRPL38:YKL170W	17	30.1382	33.2911	25.1149	4.25994	15	13	0	0	5.95884	11
YNL033W	12.5	21.4286	27.9	22	12.2857	8.76923	11.4	27.45	0	16.9231	16.9412
HAC1:YFL031W	523.248	779.329	1058.97	1175.48	445.036	459.851	268.717	448.541	338.744	340.452	458.06
YDR048C	0	0	0	1.11033	0	0	0	2.39505	0	0	4.61716
TFC6:YDR362C	42	97	101	81	37	26	25	30	20	25	40
TRP1:YDR007W	20.3589	67.1259	77.0451	67.3059	35	8	19.7231	24.1639	5	21.515	32
SGF73:YGL066W	46	175	117	94	36	37	38	46	34	58	26
FRA1:YLL029W	248	705	489	547	243	293	159	242	189	264	157
ENT3:YJR125C	69	196	222	225	50	75	64	72	67	68	41
YLL019W-A	0	0	0	0	0	0.00298171	0	0	0	0	0
SNR31:snR31	501.977	1526	1433	486	920	254	568	1538	1528	1324	1556
HMT1:YBR034C	10	24	31	30	13	8	21	39	7	26	54
DOS2:YDR068W	19	69	74	56	27	24	17	30	12	21	21
RPS3:YNL178W	132	307	220	308	339	236	185	429	172	230	501
SPT5:YML010W	160.357	485.905	434.74	338.552	219.871	236.61	123.289	262.737	143.898	251.98	153.271
CHA1:YCL064C	13	38	95	182	20	18	8	15	7	16	8
UTR2:YEL040W	22	173	230	138	103	67	52	177	105	81	143
HFD1:YMR110C	97	312	287	417	80	104	82	94	97	135	53
ARA1:YBR149W	265	498	721	770	175	191	222	218	193	245	139
tN(GUU)G	0	0	3	0	0	0	1	0	0	0	0
YDR537C	9	25.4789	40.2115	16.0738	5.04033	2.03944	2.56318	0	6.94843	9.64805	2.19646
HPR1:YDR138W	48	114	125	102	36	32	24	56	30	46	32
MRPL20:YKR085C	10	23	37	35	14	7	14	16	11	13	24
RRP46:YGR095C	12	12	29	21	8	8	6	11	8	11	13
PET100:YDR079W	9	11	18	12	8	7	7	7	4	3	4
YRF1-8:YOR396W	154.179	641.22	792.682	476.393	456.12	505.537	221.33	505.783	156.123	401.476	319.781
DYS1:YHR068W	50	99	139	105	89	47	61	106	26	72	88
PFA3:YNL326C	24	38	36	38	7	6	13	18	1	14	11
YKT6:YKL196C	43	118	140	160	59	33	29	57	31	43	32
GPB1:YOR371C	39	154	145	134	65	66	33	74	36	84	53
YGL185C	19	43	26	45	22	13	16	22	12	27	3
SNF11:YDR073W	27	66	53	65	24	26	28	35	19	37	26
SET4:YJL105W	6	22	26	36	14	8	3	20	11	8	4
YMR262W	23	72	88	80	23	17	43	30	23	35	17
ECM4:YKR076W	86	134	100	91	57	74	36	38	45	47	26
CDC123:YLR215C	9	15	28	17	12	10	12	13	5	9	4
EFM2:YBR271W	10	7	18	20	5	4	9	12	4	15	9
OCH1:YGL038C	42	163	217	176	44	44	25	52	40	65	27
BUD26:YDR241W	2	6	5	5	4.65843	0	2	0	0	2	4
YME1:YPR024W	188	561	586	498	218	199	120	219	227	220	147
SLU7:YDR088C	14	49	52	34	31	17	11	13	10	17	9
GAL83:YER027C	38	154	173	167	43	63	60	52	50	65	53
SNL1:YIL016W	20	36	46	39	18	9	16	20	6	7	17
RAM1:YDL090C	18	56	73	51	9	19	8	18	20	18	11
SAM35:YHR083W	55	140	181	139	44	43	39	60	41	30	44
DNL4:YOR005C	31	83	97	88	28	30	13	29	32	21	19
CBF1:YJR060W	45	104	105	90	27	32	9	32	40	41	32
ICP55:YER078C	21	81	73	100	40	20	25	43	51	43	22
RTG2:YGL252C	90	270	227	234	81	103	73	97	85	80	60
SSZ1:YHR064C	99.5675	181.223	205.426	188.466	211.046	134.139	127.833	298	86	166.922	222.794
YIL067C	14	67.3912	62	62	31	16	12.401	41	20.7812	27	19.879
TDH2:YJR009C	367.618	814.965	1017.9	948.686	1040.1	656.622	537.619	1270.81	650.152	735.787	969.25
AYT1:YLL063C	14	34	53	41	15	10	7	28	11	19	10
IRC15:YPL017C	82.4749	149.587	181.806	131.157	40.4036	59.6961	32	45	37	41	27
ATP22:YDR350C	57	145	157	180	31	55	50	44	58	52	24
YRF1-2:YER190W	16.4727	200.061	252.475	143.514	83.1926	40.204	12.3525	70.1135	35.5309	66.2231	42.2483
RFC5:YBR087W	11	37	37	34	12	11	22	6	12	13	23
SPH1:YLR313C	17	34	62	42	9	7	5	15	12	13	9
VMA16:YHR026W	57	139	195	188	107	44	74	76	54	63	102
TCA17:YEL048C	2	8	11	8	2	4	1	3	2	1	7
ILV1:YER086W	157	337	375	341	141	78	76	211	118	128	153
SYO1:YDL063C	3.81491	6	15	3	5	9	13	20	2	11	32.2084
RPL10:YLR075W	232.602	488.179	442.188	563.737	555.666	334.118	323.635	644.304	277.95	391.189	856.863
YGR226C	0	2.19569	0	0	0	0	0	0.449852	0	0.351661	0
YOR146W	2.16875	0	0	4.76495	0	0	0	0	1.62718	0	0
ELP4:YPL101W	26	48.7676	66.0697	45	28	12	9.9134	42	12	20	33
YMD8:YML038C	40	163	206	207	59	44	43	76	43	57	35
PCC1:YKR095W-A	4	13	12	2	3	2	5	12	7	5	6
KNS1:YLL019C	209.445	622.57	511.218	487.81	221	311.997	160	259.424	175.108	321.105	145
CWC21:YDR482C	14	24	14	19	12	13	8	6	6	8	10
SGA1:YIL099W	14	56	64	38	5	18	7	14	4	10	3
MEC3:YLR288C	15	48	49	38	6	6	9	21	13	19	10
SOV1:YMR066W	31	73	65	65.3679	27	20	19	44.449	16	23	18
BUR6:YER159C	21	69.0801	50.5688	41.1439	18.2646	11	18.1966	25.4304	13.6651	21.0307	14.4053
NUM1:YDR150W	412.656	1400.81	1283.9	1113.38	642.62	695	329	650.89	303.67	651.648	394.008
COX12:YLR038C	17	33	31	36	20	14	22	17	16	21	9
RRT14:YIL127C	3	7	7	4	8	2	6	5	2	4	3
YHR032W-A	4	7.96181	8	6.51159	3	5	5	3	0	2	4
CHO2:YGR157W	430	1675	2059	1896	725	368	320	784	931	604	352
YIL059C	11.2821	22.0581	14.9592	32.6195	8.94076	2.40768	2.92587	2.91333	0	0	5.03103
MST28:YAR033W	8.26685	21.6786	23.1429	21.7059	8.61538	8	9.61971	7.78295	4.5	4.8	9.71429
KCS1:YDR017C	84	277	267	196	75	93	64	90	68	111	67
RPH1:YER169W	76	226	165	187	70	88	57	71	45	105	52
YLR317W	0	9.0287	10.4686	6.08135	5.82734	1.42947	2.58759	2.78018	2.67069	0	0
YBR220C	19	109.381	106	84.6879	46	24	24	57.8136	31	34.8561	37.509
RIO1:YOR119C	35	33	46	46	11	26	25	20	15	23	17
MBP1:YDL056W	69	168	161	127	58	52	34	66	43	60	30
ADE17:YMR120C	233	170	530	288	55	62	23	62	61	50	63
CTF4:YPR135W	49	106	144	95	55	48	37	41	39	62	28
ASK10:YGR097W	129	353	309	263	123	121	60	174	140	115	100
GAS1:YMR307W	295	922	1260	817	610	338	367	743	400	585	578
tG(GCC)P1	0	4	2	0	0	2	0	3	0	1	2.33333
POP2:YNR052C	31	85	92	76	48	29	19	49	34	43	23
YDR365W-B	10857.5	19332	13484.1	13804.5	7930.32	3416.47	4631.88	19555.4	2738.63	8171.86	14059.7
QNS1:YHR074W	118	277	348	343.78	113	121	78.7647	152	104	146	112
ACP1:YKL192C	40	140	107	114	51	47	25	64	42	60	41
YNL146C-A	2.22323	0	3.34951	4.19851	0	1	0	2.26019	0	1	0
MSB2:YGR014W	161	769	1122	580	228	135	101	319	134	206	231
OM14:YBR230C	74	196	111	169	42	51	58	57	35	77	34
YDR034C-A	3.00725	1	0	2	1	3	0	0	0	1	2.03312
SED5:YLR026C	21	57	72	49	22	18	20	31	8	25	31
ABF2:YMR072W	36	108	121	119	64	25	21	65	30	62	35
YER158W-A	0	19.9199	18.4312	17.8561	4.73538	0	7.80342	5.56963	1.33494	9.9693	7.59465
YPL277C	15.3929	24.9954	39.5169	18.5849	17.3379	20.6345	12	9	15.5845	15.0557	5.45209
VPS68:YOL129W	42	136	145	149	42	26	33	30	37	56	50
YOR139C	0	9.96107	4.74509	4.83434	1.78523	4.61738	0	8.0664	7.3246	6.26363	2.21894
YBR116C	6.47849	36.0144	5.99763	33.6302	1.17314	8.72308	4.14624	0	0	6.20528	0
YPL257W	10	18	20	24	5	4	7	11	8	8	4
ADE2:YOR128C	124	210	315	303	78	89	37	75	30	60	80
SSO2:YMR183C	36	82	118	87	56	30	25	50	38	60	32
KIN2:YLR096W	75	195	215	209	82	72	30	106	71	83	72
SUF1:tG(UCC)O	1.88341	0	0	0	0	0	0.521295	0	0	0	0
GAB1:YLR459W	12	65	56	57	10	8	17	17	10	27	15
ABP140:YOR239W	50	196	182	151	125	94	49	111	74	97	60
YML6:YML025C	26	87	67	65	16	28	24	28	19	23	21
YKR051W	28	117	79	103	14	22	27	27	18	37	21
POG1:YIL122W	19	52	41	39	16	21	13	17	16	20	15
BNI1:YNL271C	319	1184	888	761	401	594	258	468	280	580	241
MRPL4:YLR439W	21	85	46	55	27	24	13	16	21	25	22
BDP1:YNL039W	54	188	159	134	59	59	49	88	48	68	28
PBY1:YBR094W	34	75	88	87	22	28	29	30	29	24	32
AUS1:YOR011W	33	119	121	115	48	43	33	66	25	38	37
BFA1:YJR053W	11	40	45	37	12	14	4	26	8	16	8
SEG1:YMR086W	143.277	457.92	457.267	364.133	167	258.603	132.759	174	167.936	220.675	92.6381
YRF1-3:YGR296W	269.906	707.587	582.943	445.908	272.534	317.194	187.477	288.087	227.267	268.072	210.585
TIM11:YDR322C-A	29	85	64	65	27	18	30	19	38	36	18
AI1:Q0050	1484.59	1892.09	2207.15	1938.45	1453.85	1952.98	1748.06	1176.26	1677.11	2074.24	1193.63
BDH1:YAL060W	351	529	710	650	170	261	147	170	201	210	105
GRS1:YBR121C	141.663	300	312	271	236	158.847	150.753	299	137.136	216.685	229
LEU9:YOR108W	57.0695	164.34	144	178.381	55	51	14.446	68	36.3949	51.9716	89
STE12:YHR084W	21	68	135	77	31	44	21	48	29	37	30
YHR007C-A	1	4	3	4	4	5	4	2	1	2	1
ARP9:YMR033W	24	104	109	88	36	21	24	43	31	46	32
UNG1:YML021C	16	35	48	31	12	11	5	35	12	10	12
YDR203W	0	2.02182e-07	0	0	0	0	1.0755	0	1.55903	0	0
RPL8A:YHL033C	67.2978	146.27	124.389	118.557	138.947	110.76	62	160	58.2007	91	268.606
ATG13:YPR185W	46	205	184	163	46	71	55	57	74	79	43
ORC5:YNL261W	32	45	76	67	23	26	17	31	16	28	21
tL(UAA)L	0	0	4.5	1	1	0	0	0	0	2	1
MTF2:YDL044C	17	22	26	18	8	12	11	8	6	9	6
SYC1:YOR179C	9	29	38	25	4	11	16	13	14	13	7
ICT1:YLR099C	33	67	101	69	28	28	18	28	32	23	37
SEC72:YLR292C	12	26	31	31	11	3	6	12	15	16	8
YFR012W-A	0	0	1	0	0	0	0	0	0	0	0
SRX1:YKL086W	1	11	10	9	2	7	3	2	2	3	3
TUS1:YLR425W	82	319	260	239	80	124	44	93	63	110	41
YPT6:YLR262C	23	47.0308	33.0021	30.6217	15.744	21	12.8119	8.75641	14	13.2025	17
RPS1A:YLR441C	190	377	356.637	466	469	269	229	482	247	323	584.038
YGR270C-A	3.73359	7.05566	5.44455	8.80946	6.29223	0.514832	0	1.67207	1.86906	0.897925	0
VTC4:YJL012C	79	209	275	257	141	86	79	141	134	103	104
MET28:YIR017C	170	756	733.391	516.875	128	84	32.7972	127	115	84	65.555
PEX15:YOL044W	9	12.1862	19	21	9	9	6	7	12	10	7
RDN18-2	281759	553716	635235	685157	521291	743552	477669	598635	573057	706261	554083
NTC20:YBR188C	8	8	23	6	4	0	3	4	5	3	2
RXT3:YDL076C	22	78	58	64	13	11	11	25	19	23	13
SNR47:snR47	48	103	53	26	46	78	64	52	31	91	80
APL4:YPR029C	66	208	221	237	114	81	61	124	74	104	67
YGL149W	5	20.322	11.5038	1	6	2.07464	1	4.49208	2	3	5
tL(UAA)K	0	0	0	1	0	0	0	0	0	0	0
PCH2:YBR186W	0	13	17	14	7	4	3	4	5	8	2
YMR172C-A	1.23004	2.49192	2.34115	0	0	0.000328114	2.24252	0	0	1.40789	3.2135
SNR13:snR13	253	316	371	81	322	201	276	254	160	311	517
GCY1:YOR120W	113.116	203.883	218.855	263.108	26.6032	73.2652	42.0718	39.3981	58.7651	72.0458	23.549
SER2:YGR208W	7	14.0149	25	12.0154	10	4	2	7.02158	2	5	14
CCA1:YER168C	22	43	77	75	18	23	16	28	18	31	33
FUS3:YBL016W	20	53	70	55	26	26	24	40	23	24	33
YLR361C-A	2	8	12	15	4	4	5	1	5	3	5
JIP5:YPR169W	139	252	341	260	92	90	30	83	68	81	38
CRM1:YGR218W	196	625	593	548	271	282	186	348	231	282	193
RPN9:YDR427W	32	138	130	183	54	35	38	72	54	98	45.7618
PDC5:YLR134W	24.0173	58.0106	82.0219	61.0201	32.0054	21.0128	19.0063	21.0031	65.0105	29	18
PEX9:YMR018W	5	11	17	17	2	0	2	4	2	3	2
EAF7:YNL136W	33	70	81	42	30	20	18	35	14	21	11
RIO2:YNL207W	10	40	45	21	20	10	10	32	11	14	14
UTP11:YKL099C	4	11	8	4	6	3	6	8	4	6	7
YML090W	4	26.5005	13	10.9678	4	5.44205	12.4023	17.8894	12	7.89703	8.49552
ALD6:YPL061W	1895	1423	1358	1365	901	789	536	1051	359	643	672
YDR210W-B	152.111	149.032	138.284	197.109	62.6787	33.2818	22.0524	76.0993	143.439	62.2381	89.9413
RRI1:YDL216C	32	75	87	78	16	24	22	21	22	12	16
POL5:YEL055C	63	132	127	131	82	74	80	127	66	109	88
YPR150W	2.07736	3.28382	0	0	3	0	0	0	0	3.16743	0
tE(UUC)E1	5.47258	2	3.42857	0	1.5	0	0	0	0	4	3.34286
ECM9:YKR004C	12	19.1576	17	21	8	9	4	13	9	7	9
YMR175W-A	3	1	3	0	2	0	1	1	0	0	1
YLL054C	15	51	83	59	22	10	14	21	32	23	24
DSE3:YOR264W	36	94.1601	88.5016	96.501	22.8214	36.6668	42	22.5253	21.8396	34	20.9787
YOL019W	43	166	214	129	27	44	43	62	69	59	35
ILS1:YBL076C	374	963.954	852.869	838.102	628.692	411.987	306.227	752	351	499	499.221
SNR55:snR55	133	142	117	43	87	117	109	85	62	132	103
PRR2:YDL214C	59	152	78	182	27	73	39	41	50	61	13
ECM15:YBL001C	28	54	88	58	22	22	23	35	16	28	23
RPA14:YDR156W	19	38.9735	30	34	14.6141	10	15	25	8	11	26
SLM2:YNL047C	25	47	60	52	17	22	10	28	19	25	16
YGL063C-A	0	0.467537	0.229566	0	0	0	0	0	0.178454	1.08029	0
YVC1:YOR087W	56	151	186	180	61	38	33	66	50	55	30
tV(AAC)L	0	0	0	0	0	0	0	0	0	0	0
STS1:YIR011C	48	104	93	109	35	21	24	39	34	43	18
LAS17:YOR181W	70	313	173	185	93	111	51	98	62	138	60
TRM82:YDR165W	8	14	18	18	15	4	13	23	11	16	31
FMP30:YPL103C	15	46	63	63	16	17	18	22	13	24	20
CIN1:YOR349W	29	83	127	96	30.4463	26.3681	16	47	34	49	26
UBP5:YER144C	48	154	149	139	61	59	48	61	59	75	47
CDC19:YAL038W	3664.32	5486.62	7222.35	8066.13	5534	4898	2948.88	5556.05	3429.36	4172.03	5042.47
YOR325W	4.84846	38.9949	19.1121	14.4492	13.019	6.89825	0	16.0365	10.8188	9.04016	9.11061
HMS1:YOR032C	89	403	424	335	41	39	30	60	115	68	12
MRPL8:YJL063C	37	61	61	50	25	25	26	23	22	26	24
BOL2:YGL220W	32	39	37	30	16	14	15	13	14	14	14
FAP7:YDL166C	14	13	23	14	20	3	8	13	4	11	19
COQ3:YOL096C	35	68	70	69	17	27	19	13	29	19	13
RDI1:YDL135C	26	61	77	68	21	18	18	27	15	25	18
PTP3:YER075C	36	79	83	48	20	30	22	46	14	35	24
YER053C-A	9	15	8	16	3	4	4	0	23	3	1
RPL33B:YOR234C	16	27	32	41	28	15	10	137	14	26	63
NAG1:YGR031C-A	0	0	11.2642	0	0	2.13478	0	0	0	0	0.0456087
SFK1:YKL051W	60	203	132	147	44	43	58	56	75	77	53
VPS71:YML041C	6	21	29	41	12	9	17	8	4	9	12
OPY1:YBR129C	18	55	61	58	17	22	7	11	10	21	12
CTR9:YOL145C	53	209	248	219	106.716	96	62	137	72	114	63
PTK2:YJR059W	190	863	535	601	203	409	212	254	211	315	114
NHA1:YLR138W	152	439	354	288	178	161	119	154	131	172	92
BEM1:YBR200W	22	93	85	92	34	27	22	31	18	22	28
BSC2:YDR275W	25	80	64	67	29	22	17	21	14	31	22
YNL339W-B	0	0	0.0674871	0	0	7.49663	0	0	0	0	0
NHP10:YDL002C	24	56	68	68	23	32	17	23	13	28	10
YKL096C-B	0	0	1.03584	1.05193	1.0286	0	0	0	0	0	0
PAU1:YJL223C	1.06774	1.07477	1.56999	0.5	0	0	0	0.5	2	0	0
TEL1:YBL088C	202.695	682	681.622	527	207	206.431	117	205	180	232	110.486
LAG2:YOL025W	17	94	103	92	23	27	17	30	14	34	16
SEC5:YDR166C	36	116	129	141	54	51	31	72	49	46	31
PTH4:YOL114C	3	8	9	8	1	2	1	6	1	5	1
YDL157C	12	12	17	7	9	3	11	10	2	4	8
PTP2:YOR208W	51	115	119	118	47	30	27	72	55	63	42
IDH2:YOR136W	175	656.016	653.997	789.562	312	148	139	270.085	157.636	303.419	226
YNL194C	134	420	130	372	69	202	101	64	89	185	26
RSM23:YGL129C	19	71	70	77	24	22	22	54	27	48	31
BUD27:YFL023W	11	25	30	16	21	18	6	25	10	14	24
MEF1:YLR069C	73	149	149	139	67	89	51	64	76	88	52
SNR190:snR190	10752	13411.9	18447	5152	20045	21196	8757	14443	14432	14814	25079
RPS10B:YMR230W	24	70	42	79	35	15	43	83	22	45	86
GPI12:YMR281W	18	43	32	51	21	13	20	21	25	25	16
PCI8:YIL071C	21.483	53.268	44.9847	58.6744	16	15.4348	12	12	21.1534	16.238	10
SNR78:snR78	26	24	19	6	21	19	28	21	16	33	22
BLS1:YLR408C	0	10	11	10	4	4	3	3	2	2	2
YLR157W-E	69.3247	30.8053	25.8621	36.084	36.2618	14.5913	21.464	20.0827	7.34811	17.289	28.5559
SMC6:YLR383W	44	146	188	112	65	61	35	53	46	63	29
RSM7:YJR113C	52.1128	108.187	124.287	103.349	39.5965	48.8412	24.7746	45.5106	26.7032	25.2428	37.7196
RNH1:YMR234W	17	31	44	36	6	6	10	15	6	14	15
MRPL32:YCR003W	6	28	24	38	7	4	7	17	7	11	6
DSS4:YPR017C	16	9	22	22	2	4	10	11	8	4	7
RSF1:YMR030W	11	52	46	44	13	23	5	17	16	17	10
HRD3:YLR207W	58	135	150	113	65	26	33	72	49	60	38
YHR049C-A	0	3	5	0	0	0	2	1	3	0	2
YEL018C-A	0	0	0	0	0	0	0	0	0	0	0
RPR1	389	474	756	655	684	269	514	568	729	575	1234
FMP42:YMR221C	28	80	118	93	61	29	18	44	46	34	34
YHL006W-A	3.14727	12.9367	9.29886	0	0	2.07757	1.95073	4.15833	1.367	1.39716	6.46947
GRX7:YBR014C	18	52	50	59	23	11	20	15	16	15	16
TMS1:YDR105C	39	94	113	102	38	27	31	29	28	37	26
YDR340W	4.06626	0	4.06831	5.13394	1.00622	3.45314	0	2.03165	1	3.08692	1.01202
TCB3:YML072C	535	1461	1435	1274	670	695	425	724	517	727	439
HNT2:YDR305C	4	17	20	28	10	6	10	9	4	8	16
PIH1:YHR034C	12	35	25	31	6	7	6	16	14	13	12
MRPL25:YGR076C	24	26	23	27	6	6	7	8	9	10	13
KSS1:YGR040W	9	30	65	76	15	16	11	22	13	16	15
YPD1:YDL235C	25	48	48	65	20	13	15	17	16	16	23
IES5:YER092W	35	88.852	109.872	99	23	20	10	36	22	21	17
SAC3:YDR159W	41	240	182	177	57	60	40	91	51	86	55
YHP1:YDR451C	17	64	81	65	18	8	3	25	22	15	19
PRP11:YDL043C	9	11	27	21	4	8	6	10	7	12	7
PEX13:YLR191W	20	49	53	33	17	7	7	16	15	17	10
PNT1:YOR266W	11	31	36	42	11	12	8	14	7	11	9
ULP2:YIL031W	77.2643	213.726	165.711	197.498	82.5568	71	47.4176	86	49.0579	78.1293	64.6351
tE(UUC)Q	0	0	0	1	0	0	0	0	0	0	0
GZF3:YJL110C	23	81	112	93	33	20	24	55	38	49	34
SUL1:YBR294W	1354	4405	4815	5015	888	319	51	666	690	280	109
TUB1:YML085C	121	376	402	379	190	157	155	215	130	181	151
CTI6:YPL181W	103	189.393	222.149	113.018	61.6596	84.171	52.5078	53.9934	42.0126	75.6917	33.7454
TAP42:YMR028W	21	44	52	56	17	10	13	17	23	16	9
SMF3:YLR034C	38	129	151	159	44	29	43	75	29	78	62
MCM1:YMR043W	42	162	171	117	62	75	61	67	57	65	56
CTL1:YMR180C	17	34	48	38	8	13	9	14	12	13	8
RAD9:YDR217C	23	103	103	49	42	39	23	58	17	36	30
YCR024C-B	55.715	209.325	208.04	189.282	62.2803	19.2075	62	100.602	64.6694	65.3263	58
ASA1:YPR085C	14	33	30	43	9	15	10	18	12	7	7
YJL202C	1.42316	3.357	0	1.83676	0	0	1.46115	1.30084	0	0	0
YCK3:YER123W	54	206	180	167	38	52	40	59	42	55	34
SFL1:YOR140W	56	113.039	142.255	81.1657	45.2148	54.3826	35	50.9336	32.6754	78.7364	45.7811
CNB1:YKL190W	33	72	85	55	30	17	14	32	20	35	25
YDL183C	9	97	73	87	10	17	6	11	8	18	8
YIR043C	3.06138	6	13	7.10588	3	0	0	4.09081	1	3	1
YLR365W	0	0	0	0	0	0	0	1	0	0	0
STN1:YDR082W	16	49	50	43	11	8	3	14	10	6	10
YCR064C	1.72915	0	1.8916	1.14824	1	0	1	0	2	4.1502	6.35889
YLR227W-A	237.866	182.225	86.0113	299.229	92.6948	1.4151	37.7124	203.445	4.44749	70.4439	93.5181
YBR013C	12.0585	18.334	25.3154	27.5733	3.02055	2.02718	3.11985	10.0972	0	5.06964	4.07851
MIT1:YEL007W	46	141	190	120	48	63	47	87	52	59	51
ISA2:YPR067W	19	48	50	62	17	13	11	9	12	19	18
YJL113W	28.2294	41.9513	65.3756	44.3389	10.1014	23.9499	14.1247	29.2544	19.1217	30.3648	14.5992
YGR161W-C	26	47	41	51	22	11	21	35	9	11	12
BMT6:YLR063W	10	10	11	7	8	1	10	5	0	8	8
YHR127W	5	36	41	25	15	13	9	14	10	12	6
FRS2:YFL022C	81	217	252	213	149	145	87	179	90	146	119
RET1:YOR207C	65	119	111	85	76	45	64	127	58	91	76
YCL049C	48	73	108	125	21	29	28	24	37	36	16
GCS1:YDL226C	49	86	120	98	52	26	23	63	36	41	35
EMC3:YKL207W	15	65	99.7293	74.6688	31	17.562	39	39.8734	22	21	35
SWE1:YJL187C	67	127	213	160	82	48	26	78	41	63	62
PRP21:YJL203W	13.5768	30.643	42	26.1632	11	15	4.53885	19.6992	8	9	10
PPG1:YNR032W	57	98	108	125	32	24	28	31	26	33	26
SRP14:YDL092W	12	42	26	30	10	12	12	13	6	8	9
SNU23:YDL098C	2	9	4	8	1	3	0	2	2	3	4
YAL042C-A	0	2.28642	1.97197	1.81369	0	0	0	0	0	0	0
YNL144C	124	538	185	399	132.874	247.755	141	163	89	267	72
YLR230W	16.7881	40.8166	42.3423	44.6922	8.66301	0	8.18496	25.9258	12.8303	19.5269	17.8911
SUT1:YGL162W	30	83	32	47	25	19	14	45	8	36	25
PCL5:YHR071W	198.255	470.933	400.888	570	113.646	82.5844	87.0569	103.178	102.605	90	65.5373
YER147C-A	6.88696	41.0509	35.4541	24.3082	23.2853	21.9337	21.6563	21.7562	15.742	17.2117	20.5543
JIP4:YDR475C	140	439	335	288	121	167	86	104	142	170	60
HRD1:YOL013C	56	164	173	219	55	70	45	58	43	64	38
PAH1:YMR165C	124	420	281	320	82	158	78	95	62	132	44
CAB5:YDR196C	35	74	69	74	13	25.5043	18	21	19	18	21
SPT20:YOL148C	19	67	82	73	26	17	13	23	23	28	16
YJL045W	6	14	22	18	6	7	2	5	7	4	2
HYP2:YEL034W	150.892	201.186	277.622	132.592	212.7	234.232	124.493	259.343	120.252	110.199	130.818
YER190C-B	0.258216	2.16315e-05	2.08489	0	6.86199e-05	1.20743	0.842215	0	0.00552916	5.95201e-07	0
RPL9B:YNL067W	47	83.6194	90	71	81.3361	39	61.3081	109.286	42	53	115
PSP2:YML017W	63	228	265	178	79	69	64	118	50	87	67
YKR078W	24	45	32	40	12	15	6	15	21	18	11
MET13:YGL125W	373	1658	1158	1084	576	435	191	559	654	738	267
MRP4:YHL004W	49	107	95.2891	85	30	35	24	42	26	45	29
SLA2:YNL243W	206	519	629	430	221	246	144	274	171	220	181
RBL2:YOR265W	2	10	12	9	8	4	6	11	4	1	6
TDH3:YGR192C	7008.8	9273.5	14748.2	15560.9	8082.83	7273.34	4413.5	9307.39	4778.45	6309.53	8405.18
YDL025W-A	2.50697	5.78905	0	0.447606	0.967823	4.91526	0	3.17335	0	0	0.000940737
SLY1:YDR189W	46	145	158	139	69	52	40	73	61	49	45
FRK1:YPL141C	23	203	119	109	53	15	29	63	32	52	36
YPL197C	3.22243	0	0	0	0	0	1.62185	0	0	0	6.04577
ASF1:YJL115W	41	75	79	41	30	30	27	18	21	20	14
RNQ1:YCL028W	29	115	139	131	54	44	60	93	50	67	68
NUS1:YDL193W	25	85	82	83	29	34	30	35	19	41	25
[truncated: 5,115 more rows]

## Sheet: edgeR_DE_results
gene	sampleA	sampleB	logFC	logCPM	PValue	FDR
ABP1:YCR088W	ABP1	Cntrl	10.4424	15.1303	7.86153e-27	4.76487e-23
RDN5-6	ABP1	Cntrl	10.8201	4.09802	7.43276e-12	2.2525e-08
RDN5-2	ABP1	Cntrl	10.7469	4.01753	1.24985e-11	2.52512e-08
SUL1:YBR294W	ABP1	Cntrl	-4.82207	8.15987	6.42414e-10	9.73418e-07
VTH2:YJL222W	ABP1	Cntrl	-10.3146	3.96232	6.61808e-09	8.02243e-06
YMR013W-A	ABP1	Cntrl	4.84691	4.16516	1.3374e-08	1.351e-05
BDS1:YOL164W	ABP1	Cntrl	-4.42992	6.46374	2.04415e-08	1.76994e-05
PDC6:YGR087C	ABP1	Cntrl	-5.59129	4.41758	2.82629e-08	1.96372e-05
SNR56:snR56	ABP1	Cntrl	5.14368	3.40239	2.91593e-08	1.96372e-05
SNR77:snR77	ABP1	Cntrl	4.4611	4.30403	7.55062e-08	4.57643e-05
SNR48:snR48	ABP1	Cntrl	4.15303	5.00558	1.04448e-07	5.75508e-05
YML045W-A	ABP1	Cntrl	9.2927	2.37657	1.28242e-07	6.4773e-05
tE(UUC)L	ABP1	Cntrl	9.25095	2.32914	1.6842e-07	7.85227e-05
RDN5-5	ABP1	Cntrl	9.11791	2.17851	3.44558e-07	0.000120011
YCR087W	ABP1	Cntrl	9.11791	2.17851	3.44558e-07	0.000120011
RDN5-4	ABP1	Cntrl	9.11791	2.17851	3.44558e-07	0.000120011
RDN5-3	ABP1	Cntrl	9.11791	2.17851	3.44558e-07	0.000120011
SEO1:YAL067C	ABP1	Cntrl	-3.95401	6.09278	3.5828e-07	0.000120011
RDN5-1	ABP1	Cntrl	3.69708	9.87652	3.7621e-07	0.000120011
SNR18:snR18	ABP1	Cntrl	3.98564	4.53502	4.32094e-07	0.000130946
SNR52:snR52	ABP1	Cntrl	3.98719	4.41879	5.09517e-07	0.000147056
SNR128:snR128	ABP1	Cntrl	3.6537	8.05368	5.4427e-07	0.000149946
YBL111C	ABP1	Cntrl	-9.48605	3.22611	7.94989e-07	0.000209497
COS2:YBR302C	ABP1	Cntrl	-9.16203	2.94347	9.57264e-07	0.000241749
SNR13:snR13	ABP1	Cntrl	3.56153	5.77811	1.64806e-06	0.000399556
SNR79:snR79	ABP1	Cntrl	4.41517	2.62987	2.16178e-06	0.000503944
YIL047C-A	ABP1	Cntrl	-8.96789	2.77547	2.46727e-06	0.000553856
SNR24:snR24	ABP1	Cntrl	4.18957	2.84771	2.80694e-06	0.000607603
YCT1:YLL055W	ABP1	Cntrl	-3.49782	6.39308	2.92928e-06	0.000612219
SNR76:snR76	ABP1	Cntrl	4.33728	2.54933	3.48888e-06	0.000704871
MET22:YOL064C	ABP1	Cntrl	-3.66046	5.26944	3.81803e-06	0.000746486
SNR60:snR60	ABP1	Cntrl	3.54076	4.73723	3.94518e-06	0.000747242
HCA4:YJL033W	ABP1	Cntrl	4.01334	3.16825	4.15142e-06	0.000762477
SNR75:snR75	ABP1	Cntrl	4.21196	2.4211	6.56495e-06	0.00115412
SNR61:snR61	ABP1	Cntrl	3.69343	3.52993	6.73108e-06	0.00115412
SNR41:snR41	ABP1	Cntrl	3.26809	6.2598	6.85502e-06	0.00115412
SNR39B:snR39B	ABP1	Cntrl	3.37603	4.91075	7.13205e-06	0.00116831
MET17:YLR303W	ABP1	Cntrl	3.20718	7.1131	7.89562e-06	0.00122946
SNR44:snR44	ABP1	Cntrl	3.42641	4.42981	7.91107e-06	0.00122946
SNR9:snR9	ABP1	Cntrl	3.19379	6.71666	9.13432e-06	0.00138408
YHR218W	ABP1	Cntrl	8.55727	1.55842	9.4751e-06	0.0014007
STR3:YGL184C	ABP1	Cntrl	-3.18217	7.12832	1.13679e-05	0.00164049
SNR66:snR66	ABP1	Cntrl	3.60041	3.43831	1.17835e-05	0.00166092
HIS4:YCL030C	ABP1	Cntrl	-3.14816	7.19335	1.31699e-05	0.00181415
SNR51:snR51	ABP1	Cntrl	3.45126	3.76385	1.34768e-05	0.00181518
NOP7:YGR103W	ABP1	Cntrl	3.49496	3.73715	1.43005e-05	0.00186463
SNR65:snR65	ABP1	Cntrl	5.79225	1.4526	1.44592e-05	0.00186463
tS(AGA)H	ABP1	Cntrl	8.41328	1.40495	1.79859e-05	0.00227109
SNR40:snR40	ABP1	Cntrl	3.14221	5.44128	1.87179e-05	0.00231529
YOL163W	ABP1	Cntrl	-3.61236	4.09394	2.20279e-05	0.00267023
SNR78:snR78	ABP1	Cntrl	3.97535	2.18445	2.28759e-05	0.00271864
RRT15:YLR162W-A	ABP1	Cntrl	3.06571	5.45735	2.47068e-05	0.00286212
SNR69:snR69	ABP1	Cntrl	3.23802	4.29299	2.50276e-05	0.00286212
ECM16:YMR128W	ABP1	Cntrl	3.39497	3.14401	2.93102e-05	0.0032898
SNR55:snR55	ABP1	Cntrl	3.13218	4.42335	3.46225e-05	0.0038154
FPR4:YLR449W	ABP1	Cntrl	3.31261	3.24911	3.6872e-05	0.00399073
MRD1:YPR112C	ABP1	Cntrl	3.50233	2.92287	3.91806e-05	0.00411154
SNR68:snR68	ABP1	Cntrl	3.02069	5.12015	3.93449e-05	0.00411154
MET10:YFR030W	ABP1	Cntrl	-2.87063	9.42185	4.42718e-05	0.00450341
HOM3:YER052C	ABP1	Cntrl	-2.94928	6.46362	4.52722e-05	0.00450341
tP(UGG)N1	ABP1	Cntrl	8.25331	1.23811	4.53239e-05	0.00450341
SNR72:snR72	ABP1	Cntrl	4.12381	1.71985	4.69243e-05	0.00458723
ENP2:YGR145W	ABP1	Cntrl	3.85878	2.30693	4.85126e-05	0.00466722
YLR154W-F	ABP1	Cntrl	2.84703	8.85156	4.97255e-05	0.00470916
YNL143C	ABP1	Cntrl	3.16461	3.62002	5.14926e-05	0.00480148
URA7:YBL039C	ABP1	Cntrl	3.19922	3.38183	6.17397e-05	0.00566976
YOL162W	ABP1	Cntrl	-4.21073	3.20518	6.40476e-05	0.00573878
SNR161:snR161	ABP1	Cntrl	2.94754	4.68109	6.43849e-05	0.00573878
YML018C	ABP1	Cntrl	-3.17148	4.63438	6.73529e-05	0.00591632
YLR154C-H	ABP1	Cntrl	-8.30042	2.20534	6.91332e-05	0.00595222
YDR098C-A	ABP1	Cntrl	3.48351	2.64401	6.97257e-05	0.00595222
SNR64:snR64	ABP1	Cntrl	3.20743	3.23378	7.16791e-05	0.00600206
ATG41:YPL250C	ABP1	Cntrl	-2.96459	5.45608	7.22901e-05	0.00600206
JLP1:YLL057C	ABP1	Cntrl	-3.20132	4.41606	7.44651e-05	0.00601778
SNR14:snR14	ABP1	Cntrl	3.00235	4.23058	7.44651e-05	0.00601778
SNR39:snR39	ABP1	Cntrl	3.75344	1.97037	8.02885e-05	0.00640301
SNR37:snR37	ABP1	Cntrl	2.73145	11.4609	8.80268e-05	0.00692897
SNR47:snR47	ABP1	Cntrl	3.08611	3.60739	9.08837e-05	0.00706213
AGP3:YFL055W	ABP1	Cntrl	-2.91025	5.46356	9.34152e-05	0.00716695
MET1:YKR069W	ABP1	Cntrl	-2.76343	7.1245	0.000100591	0.00762104
SNR58:snR58	ABP1	Cntrl	4.37277	1.54205	0.000103439	0.00764567
ATP8:Q0080	ABP1	Cntrl	4.37277	1.54205	0.000103439	0.00764567
SNR50:snR50	ABP1	Cntrl	3.02501	3.49003	0.000106056	0.00774466
FMO1:YHR176W	ABP1	Cntrl	-2.93655	5.12576	0.000110199	0.00795135
EBP2:YKL172W	ABP1	Cntrl	3.04034	3.56493	0.00011744	0.00837413
YIL165C	ABP1	Cntrl	-3.57795	3.54022	0.000121962	0.00859551
RPA43:YOR340C	ABP1	Cntrl	4.47549	1.08392	0.000125561	0.00874742
SIP4:YJL089W	ABP1	Cntrl	-4.68308	2.76478	0.000128791	0.00887045
RPL36B:YPL249C-A	ABP1	Cntrl	2.70934	5.97923	0.000139314	0.00948744
YPR137C-A	ABP1	Cntrl	-2.88249	5.14646	0.000141384	0.00952144
SNR45:snR45	ABP1	Cntrl	2.6549	7.94758	0.000144461	0.00960787
PUF6:YDR496C	ABP1	Cntrl	3.03876	2.99292	0.000145838	0.00960787
LOC1:YFR001W	ABP1	Cntrl	3.24636	2.67958	0.000148152	0.00965536
YGL152C	ABP1	Cntrl	7.97422	0.957555	0.000164799	0.010626
YGL117W	ABP1	Cntrl	-2.86229	4.99267	0.000167263	0.0106714
SNR85:snR85	ABP1	Cntrl	2.64605	6.27277	0.000172679	0.0108963
SNR49:snR49	ABP1	Cntrl	2.63577	6.77458	0.000174383	0.0108963
SNR35:snR35	ABP1	Cntrl	2.61056	8.21052	0.000177706	0.0109906
BNA3:YJL060W	ABP1	Cntrl	-2.63652	7.06074	0.000187508	0.0114797
SNR33:snR33	ABP1	Cntrl	2.62585	6.44192	0.000192595	0.0116732
SER33:YIL074C	ABP1	Cntrl	-2.62042	7.2787	0.000198629	0.0119197
RIX1:YHR197W	ABP1	Cntrl	3.1447	2.46227	0.00020148	0.0119722
SNR70:snR70	ABP1	Cntrl	2.57665	8.00054	0.000210203	0.012232
MET8:YBR213W	ABP1	Cntrl	-3.02622	4.12814	0.000211761	0.012232
DBP2:YNL112W	ABP1	Cntrl	2.72419	4.67852	0.00021207	0.012232
SNR190:snR190	ABP1	Cntrl	2.56128	10.9205	0.00021422	0.012232
FAF1:YIL019W	ABP1	Cntrl	5.24672	0.923979	0.00021796	0.012232
SNR87:snR87	ABP1	Cntrl	4.36901	0.989612	0.00021796	0.012232
RRP5:YMR229C	ABP1	Cntrl	2.69056	4.67173	0.000226048	0.0125695
ARG5,6:YER069W	ABP1	Cntrl	-2.56583	7.61665	0.000247157	0.0136184
SNR7-S:snR7-S	ABP1	Cntrl	2.62831	5.19428	0.000263063	0.0142741
NSR1:YGR159C	ABP1	Cntrl	2.76922	3.81974	0.000263768	0.0142741
DHR2:YKL078W	ABP1	Cntrl	7.86774	0.854382	0.000290613	0.0155877
NOG2:YNR053C	ABP1	Cntrl	2.81501	3.29905	0.000310413	0.0164588
SNR34:snR34	ABP1	Cntrl	2.4974	8.39723	0.000312286	0.0164588
PWP1:YLR196W	ABP1	Cntrl	2.85169	3.06234	0.000355341	0.0185666
SNR3:snR3	ABP1	Cntrl	2.50348	6.39365	0.000360398	0.0186698
DLS1:YJL065C	ABP1	Cntrl	-7.89473	1.86482	0.000385253	0.019622
YGR109W-A	ABP1	Cntrl	-7.89473	1.86482	0.000385253	0.019622
SNR62:snR62	ABP1	Cntrl	5.13176	0.820359	0.000390825	0.0196851
DRS1:YLL008W	ABP1	Cntrl	3.09343	2.13816	0.000395255	0.0196851
SNR5:snR5	ABP1	Cntrl	2.46707	6.67041	0.000402513	0.0196851
MET5:YJR137C	ABP1	Cntrl	-2.44373	9.23467	0.00040316	0.0196851
MTR4:YJL050W	ABP1	Cntrl	2.78684	3.33445	0.000405207	0.0196851
DID2:YKR035W-A	ABP1	Cntrl	3.22452	1.91848	0.000405979	0.0196851
SNR11:snR11	ABP1	Cntrl	2.43027	9.96064	0.000417974	0.0201059
SNR80:snR80	ABP1	Cntrl	2.58726	4.2491	0.000445473	0.0212599
SNR67:snR67	ABP1	Cntrl	2.89809	2.86551	0.000488047	0.0229346
SWF1:YDR126W	ABP1	Cntrl	-7.86316	1.83853	0.000488131	0.0229346
GRX8:YLR364W	ABP1	Cntrl	-3.61037	2.7001	0.000499278	0.0232779
SNR36:snR36	ABP1	Cntrl	2.53853	4.44417	0.00051067	0.0236273
RPS24A:YER074W	ABP1	Cntrl	2.47545	5.04629	0.00052855	0.0241477
YOR169C	ABP1	Cntrl	7.75278	0.745535	0.000530405	0.0241477
NOP1:YDL014W	ABP1	Cntrl	2.57633	4.05692	0.000533871	0.0241477
DBP3:YGL078C	ABP1	Cntrl	2.86067	2.83215	0.000592004	0.0265788
VMA10:YHR039C-A	ABP1	Cntrl	2.47337	4.52728	0.000642689	0.0286422
RLP7:YNL002C	ABP1	Cntrl	2.89144	2.23819	0.00065691	0.0290623
SNR10:snR10	ABP1	Cntrl	2.34973	7.46655	0.000667061	0.0292975
SAS10:YDL153C	ABP1	Cntrl	2.93495	2.39767	0.00068133	0.0297089
GCV1:YDR019C	ABP1	Cntrl	-2.51988	4.96696	0.000693959	0.0300435
GGC1:YDL198C	ABP1	Cntrl	-2.46552	5.4597	0.000712606	0.0306319
tE(CUC)D	ABP1	Cntrl	7.62786	0.630363	0.000726851	0.0308073
tE(CUC)I	ABP1	Cntrl	7.62786	0.630363	0.000726851	0.0308073
MAK16:YAL025C	ABP1	Cntrl	3.25732	1.52638	0.000747106	0.0314459
SCR1	ABP1	Cntrl	2.29908	12.396	0.000787696	0.0329257
NUG1:YER006W	ABP1	Cntrl	2.74762	2.89496	0.000798427	0.0331457
SHM2:YLR058C	ABP1	Cntrl	-2.33249	7.31075	0.000803948	0.0331478
MET3:YJR010W	ABP1	Cntrl	-2.30548	7.78474	0.000865103	0.03518
HAS1:YMR290C	ABP1	Cntrl	2.83498	2.18999	0.00087065	0.03518
NOP14:YDL148C	ABP1	Cntrl	2.83498	2.18999	0.00087065	0.03518
LIA1:YJR070C	ABP1	Cntrl	2.77903	2.37573	0.000879821	0.0353152
SNR43:snR43	ABP1	Cntrl	2.29758	6.71184	0.00091108	0.0363293
SNR81:snR81	ABP1	Cntrl	2.47307	3.99964	0.0009399	0.0372335
RPS9B:YBR189W	ABP1	Cntrl	2.31976	5.55712	0.000967986	0.0378861
NME1	ABP1	Cntrl	2.29275	6.51833	0.000968874	0.0378861
LTV1:YKL143W	ABP1	Cntrl	3.0136	1.73799	0.000977184	0.0379661
NOP2:YNL061W	ABP1	Cntrl	2.50682	3.36054	0.000984126	0.0379923
RPM1:Q0285	ABP1	Cntrl	2.78015	2.48175	0.000994699	0.0381574
OPI8:YKR035C	ABP1	Cntrl	-7.69401	1.69826	0.00102803	0.0389431
SYO1:YDL063C	ABP1	Cntrl	3.82723	1.0517	0.00102803	0.0389431
GAR1:YHR089C	ABP1	Cntrl	2.58427	2.96867	0.00104288	0.0392603
SNR6:snR6	ABP1	Cntrl	3.17015	1.454	0.00114105	0.042429
BRX1:YOL077C	ABP1	Cntrl	3.17015	1.454	0.00114105	0.042429
POP1:YNL221C	ABP1	Cntrl	-2.36491	5.37691	0.00115453	0.0426683
CHA1:YCL064C	ABP1	Cntrl	-2.70327	3.7057	0.0011694	0.0429561
UTP14:YML093W	ABP1	Cntrl	2.62326	2.70903	0.00119786	0.0437089
ARG1:YOL058W	ABP1	Cntrl	-2.23398	7.89257	0.00120432	0.0437089
MET14:YKL001C	ABP1	Cntrl	-2.28368	6.17072	0.00123159	0.0444325
SUL2:YLR092W	ABP1	Cntrl	-2.22174	7.51032	0.00129736	0.0465284
BUD19:YJL188C	ABP1	Cntrl	2.55895	3.01238	0.00132588	0.0472714
YLL067C	ABP1	Cntrl	-7.62038	1.63752	0.00133434	0.0472949
SDA1:YGR245C	ABP1	Cntrl	2.73542	2.54191	0.00137813	0.0485632
YLL066W-A	ABP1	Cntrl	7.49108	0.508087	0.00140897	0.0493629
BUD22:YMR014W	ABP1	Cntrl	3.1236	1.63581	0.00141891	0.0494255
GCV2:YMR189W	ABP1	Cntrl	-2.23728	6.17677	0.00146269	0.0506592
RPL39:YJL189W	ABP1	Cntrl	2.58026	2.67274	0.00147798	0.0508978
RPA190:YOR341W	ABP1	Cntrl	2.25037	5.2006	0.00151477	0.0518701
SNR42:snR42	ABP1	Cntrl	2.16409	8.42268	0.0015573	0.053027
DUG3:YNL191W	ABP1	Cntrl	-2.4777	4.05572	0.00156792	0.0530904
MMP1:YLL061W	ABP1	Cntrl	-2.19296	6.69108	0.00163534	0.0550657
YDR365W-A	ABP1	Cntrl	-2.81081	3.1869	0.00164946	0.0551864
CPA2:YJR109C	ABP1	Cntrl	-2.17161	7.34531	0.00165714	0.0551864
YML039W	ABP1	Cntrl	-7.54278	1.57373	0.00174368	0.0565157
YOR302W	ABP1	Cntrl	-7.50236	1.5406	0.00174368	0.0565157
ZIP2:YGL249W	ABP1	Cntrl	-7.50236	1.5406	0.00174368	0.0565157
RRP8:YDR083W	ABP1	Cntrl	3.71227	0.956981	0.00174368	0.0565157
ALB1:YJL122W	ABP1	Cntrl	3.31932	1.01971	0.00174368	0.0565157
YLR154W-E	ABP1	Cntrl	2.12245	12.1848	0.00181586	0.0581083
RPA135:YPR010C	ABP1	Cntrl	2.22726	4.8522	0.00181826	0.0581083
ARG4:YHR018C	ABP1	Cntrl	-2.1653	6.92471	0.00182716	0.0581083
DBP9:YLR276C	ABP1	Cntrl	2.53594	2.63571	0.00183116	0.0581083
RRB1:YMR131C	ABP1	Cntrl	2.38967	3.15975	0.00185236	0.0584749
SNR32:snR32	ABP1	Cntrl	2.12479	8.02322	0.00190048	0.0596828
SNR189:snR189	ABP1	Cntrl	2.12486	7.08318	0.00198199	0.061922
SYG1:YIL047C	ABP1	Cntrl	-2.13555	7.01907	0.00202779	0.0630278
NIT1:YIL164C	ABP1	Cntrl	-2.34067	4.56076	0.00204467	0.0632283
DBF20:YPR111W	ABP1	Cntrl	-3.02191	2.71577	0.00209104	0.0643339
VAR1:Q0140	ABP1	Cntrl	2.651	2.03776	0.00212562	0.0650515
CBF5:YLR175W	ABP1	Cntrl	2.23443	4.30324	0.00213583	0.0650515
RPL6A:YML073C	ABP1	Cntrl	2.15221	5.53328	0.00216045	0.0654724
RPL24B:YGR148C	ABP1	Cntrl	2.17255	4.99451	0.00218261	0.0658149
RLP24:YLR009W	ABP1	Cntrl	2.84747	1.77328	0.00231637	0.0695025
ARG7:YMR062C	ABP1	Cntrl	-2.15281	5.87401	0.00234642	0.0700574
MRPL37:YBR268W	ABP1	Cntrl	2.57411	2.30905	0.00237875	0.0706744
SNR46:snR46	ABP1	Cntrl	2.08373	7.09867	0.00240192	0.0710148
SNR38:snR38	ABP1	Cntrl	2.58406	1.98428	0.00248498	0.0731139
SNR82:snR82	ABP1	Cntrl	2.05494	8.7305	0.0025464	0.0745589
GUA1:YMR217W	ABP1	Cntrl	2.15074	4.66053	0.00272161	0.0793062
PWP2:YCR057C	ABP1	Cntrl	2.26595	3.5855	0.00275319	0.0794024
URA2:YJL130C	ABP1	Cntrl	2.03721	8.4779	0.00275967	0.0794024
MET28:YIR017C	ABP1	Cntrl	-2.17171	5.17914	0.00276422	0.0794024
YHR052W-A	ABP1	Cntrl	7.33997	0.377755	0.00286389	0.0811123
YHR054W-A	ABP1	Cntrl	7.33997	0.377755	0.00286389	0.0811123
tD(GUC)N	ABP1	Cntrl	4.55013	0.342182	0.00286389	0.0811123
TMT1:YER175C	ABP1	Cntrl	-2.21951	4.46337	0.00293137	0.0824138
15S_RRNA:Q0020	ABP1	Cntrl	2.01934	9.50764	0.00293704	0.0824138
RPL37B:YDR500C	ABP1	Cntrl	2.18684	3.93841	0.00299561	0.0836701
ROK1:YGL171W	ABP1	Cntrl	3.1944	0.924607	0.00304285	0.0845996
SNR8:snR8	ABP1	Cntrl	2.01704	7.68906	0.00309007	0.0852012
CSM1:YCR086W	ABP1	Cntrl	2.61588	2.23943	0.0030926	0.0852012
SNR31:snR31	ABP1	Cntrl	2.02052	7.05366	0.00318562	0.0870615
YPL264C	ABP1	Cntrl	-2.74153	2.84794	0.00318886	0.0870615
NOP56:YLR197W	ABP1	Cntrl	2.12927	3.97329	0.00329725	0.0886288
GTO1:YGR154C	ABP1	Cntrl	-2.29303	4.0133	0.00330143	0.0886288
BMS1:YPL217C	ABP1	Cntrl	2.16373	3.83308	0.00330143	0.0886288
YKL068W-A	ABP1	Cntrl	-2.3991	3.75134	0.00330475	0.0886288
THI72:YOR192C	ABP1	Cntrl	-3.14593	2.31898	0.00341955	0.0913034
RPL8B:YLL045C	ABP1	Cntrl	2.01705	6.38086	0.0034535	0.0918057
ARG8:YOL140W	ABP1	Cntrl	-2.17813	4.49973	0.00352912	0.0930691
RDN58-1	ABP1	Cntrl	1.97468	11.3951	0.0035471	0.0930691
RDN58-2	ABP1	Cntrl	1.97468	11.3951	0.0035471	0.0930691
YHR112C	ABP1	Cntrl	-2.08629	5.3059	0.00366759	0.0958157
SNR19:snR19	ABP1	Cntrl	1.96384	8.61779	0.00382903	0.0996041
ASH1:YKL185W	ASH1	Cntrl	8.48547	12.5376	6.4956e-21	3.97401e-17
RDN5-6	ASH1	Cntrl	12.0223	5.43868	3.52328e-16	1.07777e-12
RDN5-5	ASH1	Cntrl	9.34608	2.83431	1.06732e-08	1.20923e-05
RDN5-4	ASH1	Cntrl	9.34608	2.83431	1.06732e-08	1.20923e-05
RDN5-3	ASH1	Cntrl	9.34608	2.83431	1.06732e-08	1.20923e-05
YHR218W	ASH1	Cntrl	9.32903	2.81818	1.18591e-08	1.20923e-05
YPL060C-A	ASH1	Cntrl	-9.29976	2.74883	1.46906e-08	1.28396e-05
SPE1:YKL184W	ASH1	Cntrl	4.0144	8.01706	6.44312e-08	4.92737e-05
YML039W	ASH1	Cntrl	-8.24335	1.75452	4.27844e-06	0.00290839
YIL177C	ASH1	Cntrl	7.94035	1.54398	1.79859e-05	0.0110038
YJL047C-A	ASH1	Cntrl	-7.71937	1.28445	5.79138e-05	0.0322106
YLR154C-G	ATG8	Cntrl	18.4489	11.6541	7.46066e-35	4.48983e-31
ATG8:YBL078C	ATG8	Cntrl	11.3203	12.7785	4.53171e-29	1.36359e-25
RDN5-6	ATG8	Cntrl	12.7481	5.92051	9.5779e-18	1.92133e-14
YOL103W-A	ATG8	Cntrl	-8.40506	5.6874	2.04216e-14	3.07243e-11
RDN5-2	ATG8	Cntrl	11.312	4.43244	1.62215e-13	1.95241e-10
YLR154W-F	ATG8	Cntrl	4.94977	10.6587	1.38782e-10	1.3581e-07
YHR218W	ATG8	Cntrl	10.2688	3.31662	1.57971e-10	1.3581e-07
YGR038C-B	ATG8	Cntrl	-6.97951	4.33683	2.26303e-10	1.70237e-07
YMR013W-A	ATG8	Cntrl	5.35712	4.57008	4.67615e-10	3.12679e-07
MET17:YLR303W	ATG8	Cntrl	4.71676	8.38316	7.7843e-10	4.68459e-07
YMR051C	ATG8	Cntrl	7.26761	2.98276	1.04166e-09	5.69882e-07
SNR52:snR52	ATG8	Cntrl	4.95782	5.25591	1.23226e-09	6.17976e-07
YLR227W-A	ATG8	Cntrl	-6.64527	4.02856	1.86432e-09	8.63039e-07
RME2	ATG8	Cntrl	-10.1137	3.5141	2.4864e-09	1.0688e-06
SNR56:snR56	ATG8	Cntrl	5.504	3.68559	4.28724e-09	1.72004e-06
YGR115C	ATG8	Cntrl	5.51168	3.08562	6.56996e-09	2.47113e-06
SNR60:snR60	ATG8	Cntrl	4.48163	5.51531	9.72013e-09	3.44092e-06
YHR214C-C	ATG8	Cntrl	-9.80788	3.23844	1.62073e-08	5.41864e-06
YGL152C	ATG8	Cntrl	9.51469	2.49262	1.82837e-08	5.79113e-06
SNR128:snR128	ATG8	Cntrl	4.08929	8.30819	3.74558e-08	1.12704e-05
YNL143C	ATG8	Cntrl	4.3961	4.6982	4.29262e-08	1.23014e-05
RDN5-5	ATG8	Cntrl	9.32233	2.28207	5.90433e-08	1.48051e-05
RDN5-4	ATG8	Cntrl	9.32233	2.28207	5.90433e-08	1.48051e-05
RDN5-3	ATG8	Cntrl	9.32233	2.28207	5.90433e-08	1.48051e-05
YBL111C	ATG8	Cntrl	-9.5608	3.01779	6.43807e-08	1.54977e-05
YJL020W-A	ATG8	Cntrl	9.25205	2.20532	8.63636e-08	1.99899e-05
YAL037C-B	ATG8	Cntrl	-9.43072	2.90236	1.464e-07	3.26308e-05
RDN5-1	ATG8	Cntrl	3.81722	9.83158	1.80973e-07	3.88963e-05
PDC6:YGR087C	ATG8	Cntrl	-4.59847	4.25127	1.92682e-07	3.99849e-05
tE(UUC)L	ATG8	Cntrl	9.018	1.95092	3.44558e-07	6.91183e-05
COS2:YBR302C	ATG8	Cntrl	-9.23676	2.73117	4.03028e-07	7.82395e-05
SNR51:snR51	ATG8	Cntrl	4.05145	4.23392	4.48614e-07	8.43674e-05
SNR72:snR72	ATG8	Cntrl	4.74712	2.28813	6.54689e-07	0.000119391
SNR39B:snR39B	ATG8	Cntrl	3.7472	5.1276	7.12164e-07	0.000126053
SNR190:snR190	ATG8	Cntrl	3.52835	11.6245	9.84209e-07	0.000165703
SNR8:snR8	ATG8	Cntrl	3.53917	8.85904	9.91241e-07	0.000165703
SNR66:snR66	ATG8	Cntrl	3.95564	3.68344	1.14752e-06	0.000186643
SNR41:snR41	ATG8	Cntrl	3.52294	6.34732	1.46335e-06	0.000231748
SNR76:snR76	ATG8	Cntrl	4.53348	2.67984	1.53653e-06	0.000237099
SNR79:snR79	ATG8	Cntrl	4.47584	2.62115	2.06744e-06	0.000311047
SNR62:snR62	ATG8	Cntrl	5.89143	1.51555	3.54078e-06	0.000503201
SNR53:snR53	ATG8	Cntrl	5.00828	1.55125	3.54078e-06	0.000503201
SNR18:snR18	ATG8	Cntrl	3.61872	4.05536	3.59549e-06	0.000503201
SNR24:snR24	ATG8	Cntrl	4.15721	2.7366	3.68192e-06	0.000503587
SNR77:snR77	ATG8	Cntrl	3.7435	3.4759	3.96748e-06	0.000530585
SNR68:snR68	ATG8	Cntrl	3.38216	5.31428	4.41422e-06	0.000577495
SNR34:snR34	ATG8	Cntrl	3.23958	8.89464	5.56014e-06	0.000711934
BDS1:YOL164W	ATG8	Cntrl	-3.30744	6.36517	6.21383e-06	0.000779059
SNR161:snR161	ATG8	Cntrl	3.3442	4.91294	7.30229e-06	0.000896841
SNR50:snR50	ATG8	Cntrl	3.47816	3.8051	9.41168e-06	0.00113279
YML040W	ATG8	Cntrl	-3.28624	5.32116	1.18224e-05	0.00136822
YJR026W	ATG8	Cntrl	-3.28624	5.32116	1.18224e-05	0.00136822
SNR67:snR67	ATG8	Cntrl	3.55236	3.37816	1.29844e-05	0.00147434
YCT1:YLL055W	ATG8	Cntrl	-3.15452	6.25501	1.48801e-05	0.00165831
SNR61:snR61	ATG8	Cntrl	3.49469	3.23612	1.5226e-05	0.001666
YDR545C-A	ATG8	Cntrl	3.27801	4.24677	1.77056e-05	0.00186619
SNR40:snR40	ATG8	Cntrl	3.13161	5.29074	1.78879e-05	0.00186619
YPL222C-A	ATG8	Cntrl	8.32458	1.21899	1.79859e-05	0.00186619
YPL238C	ATG8	Cntrl	8.25441	1.14768	2.24824e-05	0.0022932
RDN58-1	ATG8	Cntrl	2.96872	12.0781	2.43307e-05	0.00240036
RDN58-2	ATG8	Cntrl	2.96872	12.0781	2.43307e-05	0.00240036
SNR58:snR58	ATG8	Cntrl	4.46448	1.58581	2.69459e-05	0.00261549
SNR69:snR69	ATG8	Cntrl	3.17887	4.11475	2.7816e-05	0.00265709
SNR33:snR33	ATG8	Cntrl	2.97948	6.60319	2.92154e-05	0.00274716
SNR9:snR9	ATG8	Cntrl	2.97363	6.36785	3.07827e-05	0.00285001
RPS30B:YOR182C	ATG8	Cntrl	3.25412	3.32985	3.19618e-05	0.00290208
YLR154C-H	ATG8	Cntrl	-8.37504	1.9842	3.23096e-05	0.00290208
VBA2:YBR293W	ATG8	Cntrl	-3.30243	4.15853	3.59835e-05	0.00318454
SNR75:snR75	ATG8	Cntrl	3.94945	2.09775	3.70145e-05	0.00322831
SNR11:snR11	ATG8	Cntrl	2.88495	10.196	3.88136e-05	0.00333686
YCR013C	ATG8	Cntrl	-3.35516	3.93544	4.4554e-05	0.00361102
tS(AGA)H	ATG8	Cntrl	8.10294	0.996002	4.53239e-05	0.00361102
YML045W-A	ATG8	Cntrl	8.10294	0.996002	4.53239e-05	0.00361102
JLP1:YLL057C	ATG8	Cntrl	-3.24661	4.2275	4.54947e-05	0.00361102
SNR189:snR189	ATG8	Cntrl	2.87198	7.56544	4.56003e-05	0.00361102
SEO1:YAL067C	ATG8	Cntrl	-2.9561	6.00162	4.56028e-05	0.00361102
YOR055W	ATG8	Cntrl	-8.3025	1.92237	4.69243e-05	0.00362039
SNR71:snR71	ATG8	Cntrl	4.34451	1.47067	4.69243e-05	0.00362039
SNR82:snR82	ATG8	Cntrl	2.82568	9.22458	5.4049e-05	0.00411731
YPR137C-A	ATG8	Cntrl	-2.99792	4.95893	6.45814e-05	0.00485814
SNR32:snR32	ATG8	Cntrl	2.79586	8.43584	6.61122e-05	0.00487774
SNR47:snR47	ATG8	Cntrl	3.06379	3.47717	6.6463e-05	0.00487774
YDL228C	ATG8	Cntrl	-8.22613	1.85745	6.91332e-05	0.00501257
MRD1:YPR112C	ATG8	Cntrl	3.32366	2.667	8.62073e-05	0.00617614
SNR55:snR55	ATG8	Cntrl	2.92655	4.10955	0.000102001	0.00722164
SNR13:snR13	ATG8	Cntrl	2.7962	4.93536	0.000108236	0.00757402
NOP7:YGR103W	ATG8	Cntrl	3.04017	3.20281	0.000113548	0.00785438
SNR48:snR48	ATG8	Cntrl	2.95997	3.74226	0.00011612	0.00794103
SNR45:snR45	ATG8	Cntrl	2.68586	7.81948	0.000119382	0.00807237
FEX1:YOR390W	ATG8	Cntrl	-8.08911	1.74146	0.000127312	0.00851292
YOL163W	ATG8	Cntrl	-3.05083	3.94334	0.000130289	0.00861626
VHT1:YGR065C	ATG8	Cntrl	-3.02937	4.14938	0.000132313	0.00865502
SNR86:snR86	ATG8	Cntrl	2.64546	11.5159	0.00013818	0.0089416
SAS10:YDL153C	ATG8	Cntrl	3.22864	2.57896	0.000140031	0.00896498
YIR020W-A	ATG8	Cntrl	7.84095	0.741702	0.000164799	0.0103308
YOR343W-A	ATG8	Cntrl	7.84095	0.741702	0.000164799	0.0103308
SNR84:snR84	ATG8	Cntrl	2.57446	8.69007	0.000207675	0.0128844
NOP14:YDL148C	ATG8	Cntrl	3.09287	2.335	0.000231473	0.0142143
ARG3:YJL088W	ATG8	Cntrl	-2.61686	6.00267	0.000242951	0.0146729
YLR230W	ATG8	Cntrl	-7.9377	1.61405	0.000243817	0.0146729
ENP2:YGR145W	ATG8	Cntrl	3.34704	1.76417	0.000247831	0.0147668
SNR64:snR64	ATG8	Cntrl	2.90024	2.85477	0.000252713	0.0149101
SNR37:snR37	ATG8	Cntrl	2.51271	11.1152	0.000273875	0.0160017
DID2:YKR035W-A	ATG8	Cntrl	3.3162	1.93233	0.000295197	0.0170817
YOL162W	ATG8	Cntrl	-3.21784	3.04901	0.000325979	0.0186832
PTR2:YKR093W	ATG8	Cntrl	-2.97762	3.45946	0.000332315	0.0188667
SUL1:YBR294W	ATG8	Cntrl	-2.48657	8.18211	0.000337854	0.0190019
RRP5:YMR229C	ATG8	Cntrl	2.56935	4.43297	0.000380442	0.0211991
YPL142C	ATG8	Cntrl	-7.83858	1.5311	0.000385253	0.0212702
SNR44:snR44	ATG8	Cntrl	2.6155	3.56725	0.000456098	0.024768
AGP3:YFL055W	ATG8	Cntrl	-2.5274	5.3361	0.000456838	0.024768
SNR36:snR36	ATG8	Cntrl	2.55242	4.32538	0.000462804	0.0248675
SNR3:snR3	ATG8	Cntrl	2.44009	6.18984	0.000470694	0.0250676
OPI8:YKR035C	ATG8	Cntrl	-7.76851	1.47269	0.000488131	0.0257682
YDL172C	ATG8	Cntrl	3.74948	1.32448	0.000497338	0.0260259
YDR365W-A	ATG8	Cntrl	-3.1161	2.96418	0.000505369	0.0262182
YER190C-A	ATG8	Cntrl	7.63547	0.550159	0.000530405	0.02638
YPL283W-A	ATG8	Cntrl	7.63547	0.550159	0.000530405	0.02638
YGR296C-A	ATG8	Cntrl	7.63547	0.550159	0.000530405	0.02638
YML133W-A	ATG8	Cntrl	7.63547	0.550159	0.000530405	0.02638
YNL339W-A	ATG8	Cntrl	7.63547	0.550159	0.000530405	0.02638
SNR10:snR10	ATG8	Cntrl	2.3943	7.34987	0.000537431	0.0265103
URA2:YJL130C	ATG8	Cntrl	2.37198	8.59694	0.000569848	0.0278809
STR3:YGL184C	ATG8	Cntrl	-2.39402	7.06177	0.000588416	0.0285572
YLR302C	ATG8	Cntrl	-3.09249	2.94457	0.000605395	0.0291461
YLL067C	ATG8	Cntrl	-7.69485	1.41151	0.000621965	0.0294723
KIN28:YDL108W	ATG8	Cntrl	-7.69485	1.41151	0.000621965	0.0294723
CSS1:YIL169C	ATG8	Cntrl	2.32057	8.27692	0.000735182	0.034565
CPT1:YNL130C	ATG8	Cntrl	-2.68213	3.75107	0.000744183	0.034717
SNR38:snR38	ATG8	Cntrl	2.83811	2.11171	0.000773646	0.0358139
SNR49:snR49	ATG8	Cntrl	2.33049	6.36322	0.000781476	0.0359002
ATF2:YGR177C	ATG8	Cntrl	-7.65657	1.3798	0.000797167	0.0361633
OYE3:YPL171C	ATG8	Cntrl	2.63298	2.84171	0.000799221	0.0361633
YOS1:YER074W-A	ATG8	Cntrl	-4.20657	1.89527	0.000814859	0.0365957
ARG4:YHR018C	ATG8	Cntrl	-2.31896	6.73578	0.000862646	0.0384548
RDN25-1	ATG8	Cntrl	2.2734	18.2295	0.00088951	0.0390735
RDN25-2	ATG8	Cntrl	2.2734	18.2295	0.00088951	0.0390735
LSR1	ATG8	Cntrl	2.27191	10.8914	0.000900405	0.0392655
SNR43:snR43	ATG8	Cntrl	2.29013	6.55389	0.000926711	0.0398942
SNR4:snR4	ATG8	Cntrl	2.26871	8.90087	0.000928081	0.0398942
tD(GUC)B	ATG8	Cntrl	4.71181	0.418249	0.00100641	0.0429544
ZIP2:YGL249W	ATG8	Cntrl	-7.57681	1.31393	0.00102803	0.0435683
HYP2:YEL034W	ATG8	Cntrl	2.3013	5.23999	0.00103764	0.0436681
YBR012W-A	ATG8	Cntrl	2.57294	2.79044	0.00111705	0.0466836
HOM3:YER052C	ATG8	Cntrl	-2.25812	6.39047	0.00120458	0.0491596
YLR156C-A	ATG8	Cntrl	2.32375	4.33228	0.00120898	0.0491596
YLR159C-A	ATG8	Cntrl	2.32375	4.33228	0.00120898	0.0491596
YLR157C-C	ATG8	Cntrl	2.32375	4.33228	0.00120898	0.0491596
YIR042C	ATG8	Cntrl	-3.01514	2.59659	0.00123081	0.0497113
YRF1-6:YNL339C	ATG8	Cntrl	2.21443	6.81817	0.00131026	0.0525675
SNR87:snR87	ATG8	Cntrl	4.17475	0.777625	0.00133434	0.0526711
SNR46:snR46	ATG8	Cntrl	2.20695	7.04583	0.00134041	0.0526711
ARG5,6:YER069W	ATG8	Cntrl	-2.20711	7.51137	0.00134186	0.0526711
DRS1:YLL008W	ATG8	Cntrl	2.84361	1.84844	0.00134785	0.0526711
YIL152W	ATG8	Cntrl	-4.09801	1.80543	0.00141891	0.0549304
ORT1:YOR130C	ATG8	Cntrl	-2.64633	3.34054	0.00142796	0.0549304
LIA1:YJR070C	ATG8	Cntrl	2.61884	2.15507	0.00143305	0.0549304
MMP1:YLL061W	ATG8	Cntrl	-2.20352	6.52524	0.00149226	0.056838
BMS1:YPL217C	ATG8	Cntrl	2.30308	3.82284	0.00152432	0.0576943
UTP14:YML093W	ATG8	Cntrl	2.51378	2.52133	0.00156801	0.0589767
CPA1:YOR303W	ATG8	Cntrl	-2.22922	5.63587	0.00161996	0.0605521
SNR78:snR78	ATG8	Cntrl	3.11211	1.34192	0.00171843	0.0636196
HST3:YOR025W	ATG8	Cntrl	-2.78415	2.92514	0.00172341	0.0636196
MET22:YOL064C	ATG8	Cntrl	-2.22515	5.24437	0.00173373	0.0636196
MPH3:YJR160C	ATG8	Cntrl	2.60327	2.34	0.0020415	0.0744535
SNR81:snR81	ATG8	Cntrl	2.29076	3.72217	0.00205372	0.0744535
TIF3:YPR163C	ATG8	Cntrl	2.19189	4.65384	0.00210253	0.0751499
ADY2:YCR010C	ATG8	Cntrl	-2.60046	2.9751	0.0021204	0.0751499
PUF6:YDR496C	ATG8	Cntrl	2.5152	2.44195	0.00212207	0.0751499
SNR35:snR35	ATG8	Cntrl	2.10102	7.6285	0.00212288	0.0751499
RPA190:YOR341W	ATG8	Cntrl	2.14467	4.97161	0.00223179	0.0785432
YLR252W	ATG8	Cntrl	-3.00835	2.231	0.00226613	0.0792594
PRM7:YDL039C	ATG8	Cntrl	2.47504	2.32402	0.00227848	0.0792594
YLR157C-B	ATG8	Cntrl	-7.40269	1.17114	0.00229484	0.0793699
MAK21:YDR060W	ATG8	Cntrl	2.3004	3.38116	0.0023308	0.0801529
SNR63:snR63	ATG8	Cntrl	2.06675	10.1606	0.00235573	0.0805499
MDN1:YLR106C	ATG8	Cntrl	2.08317	6.95373	0.00238097	0.0809531
RPA135:YPR010C	ATG8	Cntrl	2.15256	4.65236	0.00239808	0.0810768
ARG1:YOL058W	ATG8	Cntrl	-2.06725	7.76193	0.00250783	0.0843136
MATALPHA2:YCR039C	ATG8	Cntrl	-3.94971	1.68355	0.00254733	0.0851658
RRT15:YLR162W-A	ATG8	Cntrl	2.12871	4.50582	0.00268426	0.089248
YLR198C	ATG8	Cntrl	2.78161	1.47722	0.00276276	0.0908542
YGR259C	ATG8	Cntrl	2.78161	1.47722	0.00276276	0.0908542
NOP1:YDL014W	ATG8	Cntrl	2.19559	3.61251	0.00284405	0.0921652
YGL132W	ATG8	Cntrl	7.10817	0.0944176	0.00286389	0.0921652
YDL086C-A	ATG8	Cntrl	7.10817	0.0944176	0.00286389	0.0921652
YGL123C-A	ATG8	Cntrl	7.10817	0.0944176	0.00286389	0.0921652
SNR80:snR80	ATG8	Cntrl	2.18224	3.78061	0.00301532	0.0955558
ARG7:YMR062C	ATG8	Cntrl	-2.07258	5.72006	0.00301614	0.0955558
NMD4:YLR363C	ATG8	Cntrl	-2.94439	2.17919	0.00301688	0.0955558
YLR154W-E	ATG8	Cntrl	2.00465	11.9321	0.00309988	0.0976704
GFD2:YCL036W	ATG8	Cntrl	2.95223	1.21243	0.00311863	0.0977497
EXO70:YJL085W	Cntrl	EXO70	-10.9801	12.8399	4.42261e-28	2.67656e-24
MF(ALPHA)1:YPL187W	Cntrl	EXO70	-9.68842	5.5347	2.0407e-16	6.17515e-13
RDN5-2	Cntrl	EXO70	-11.7242	4.8922	1.33938e-14	2.70197e-11
STE2:YFL026W	Cntrl	EXO70	6.62995	5.61098	3.90706e-12	5.91139e-09
STE3:YKL178C	Cntrl	EXO70	-6.30912	4.50745	9.75703e-12	1.18099e-08
YLR154W-F	Cntrl	EXO70	-5.02949	10.7363	8.211e-11	8.28216e-08
SNR9:snR9	Cntrl	EXO70	-4.74689	8.03078	6.9056e-10	5.97038e-07
RRT15:YLR162W-A	Cntrl	EXO70	-4.76124	6.91941	8.99864e-10	6.80747e-07
PDC6:YGR087C	Cntrl	EXO70	6.69843	4.23205	2.64999e-09	1.73417e-06
SNR128:snR128	Cntrl	EXO70	-4.50086	8.70049	2.86545e-09	1.73417e-06
MET17:YLR303W	Cntrl	EXO70	-4.41431	8.09089	5.45563e-09	3.00159e-06
SNR48:snR48	Cntrl	EXO70	-4.54564	5.24864	8.50891e-09	4.29133e-06
SNR161:snR161	Cntrl	EXO70	-4.4062	5.92039	1.26328e-08	5.88104e-06
SNR35:snR35	Cntrl	EXO70	-4.21894	9.52288	1.54521e-08	6.30744e-06
YMR013W-A	Cntrl	EXO70	-4.88243	4.06702	1.56331e-08	6.30744e-06
SNR13:snR13	Cntrl	EXO70	-4.31471	6.34777	1.80767e-08	6.8375e-06
RDN5-5	Cntrl	EXO70	-9.50572	2.47639	2.56226e-08	7.78008e-06
RDN5-4	Cntrl	EXO70	-9.50572	2.47639	2.56226e-08	7.78008e-06
RDN5-3	Cntrl	EXO70	-9.50572	2.47639	2.56226e-08	7.78008e-06
SNR34:snR34	Cntrl	EXO70	-4.13566	9.72664	2.57108e-08	7.78008e-06
SNR44:snR44	Cntrl	EXO70	-4.36143	5.19625	2.72493e-08	7.85299e-06
SNR41:snR41	Cntrl	EXO70	-4.16678	6.95215	3.10365e-08	8.53786e-06
SAG1:YJR004C	Cntrl	EXO70	-4.16252	5.92188	5.36301e-08	1.41117e-05
SNR14:snR14	Cntrl	EXO70	-4.21063	5.24187	6.17938e-08	1.55823e-05
VTH1:YIL173W	Cntrl	EXO70	9.61186	3.1235	6.43807e-08	1.55853e-05
SNR49:snR49	Cntrl	EXO70	-3.97699	7.84299	7.9484e-08	1.85014e-05
SNR190:snR190	Cntrl	EXO70	-3.92696	11.9955	8.82073e-08	1.97715e-05
MF(ALPHA)2:YGL089C	Cntrl	EXO70	-4.4349	4.04844	9.41503e-08	2.00508e-05
MFA2:YNL145W	Cntrl	EXO70	9.54205	3.06177	9.62699e-08	2.00508e-05
SNR80:snR80	Cntrl	EXO70	-4.09585	5.51123	9.93927e-08	2.00508e-05
STE6:YKL209C	Cntrl	EXO70	4.21219	5.64058	1.23272e-07	2.33734e-05
SNR45:snR45	Cntrl	EXO70	-3.88882	8.91059	1.23658e-07	2.33734e-05
SEO1:YAL067C	Cntrl	EXO70	4.10596	5.92122	1.27449e-07	2.33734e-05
SNR37:snR37	Cntrl	EXO70	-3.86077	12.327	1.32323e-07	2.35536e-05
SUL1:YBR294W	Cntrl	EXO70	3.87936	8.04444	1.6295e-07	2.81763e-05
SNR33:snR33	Cntrl	EXO70	-3.85861	7.4097	1.81046e-07	3.04358e-05
SNR18:snR18	Cntrl	EXO70	-4.11775	4.525	1.96212e-07	3.17987e-05
SNR56:snR56	Cntrl	EXO70	-4.74351	2.85845	1.99661e-07	3.17987e-05
SNR68:snR68	Cntrl	EXO70	-3.90575	5.80141	2.22512e-07	3.43453e-05
URA7:YBL039C	Cntrl	EXO70	-4.20495	4.23116	2.27001e-07	3.43453e-05
YLR154W-E	Cntrl	EXO70	-3.76105	13.4707	2.42585e-07	3.58079e-05
RDN5-1	Cntrl	EXO70	-3.76089	9.77904	2.55101e-07	3.67588e-05
SNR70:snR70	Cntrl	EXO70	-3.76081	8.91079	2.64237e-07	3.71898e-05
SNR11:snR11	Cntrl	EXO70	-3.74377	10.9762	2.71295e-07	3.73154e-05
SNR8:snR8	Cntrl	EXO70	-3.74542	9.05012	2.87814e-07	3.87078e-05
RPS30B:YOR182C	Cntrl	EXO70	-4.14609	4.17253	3.12997e-07	4.10669e-05
YNL276C	Cntrl	EXO70	9.32169	2.86783	3.18927e-07	4.10669e-05
SNR32:snR32	Cntrl	EXO70	-3.7008	9.25485	3.70886e-07	4.67625e-05
NSR1:YGR159C	Cntrl	EXO70	-3.92617	4.77015	3.85546e-07	4.71613e-05
SNR43:snR43	Cntrl	EXO70	-3.71461	7.82009	3.89634e-07	4.71613e-05
SNR5:snR5	Cntrl	EXO70	-3.69058	7.61446	4.62893e-07	5.493e-05
RRP5:YMR229C	Cntrl	EXO70	-3.78039	5.53277	5.06975e-07	5.90041e-05
RPA43:YOR340C	Cntrl	EXO70	-5.42301	1.92097	5.43348e-07	6.20442e-05
BAR1:YIL015W	Cntrl	EXO70	4.1314	4.77831	5.66903e-07	6.35351e-05
SNR3:snR3	Cntrl	EXO70	-3.65489	7.27546	6.08133e-07	6.69168e-05
SNR7-S:snR7-S	Cntrl	EXO70	-3.71011	6.03398	6.39372e-07	6.90978e-05
SNR67:snR67	Cntrl	EXO70	-4.04459	3.83629	6.84133e-07	7.26381e-05
SNR81:snR81	Cntrl	EXO70	-3.76776	5.04754	7.61654e-07	7.94747e-05
SNR46:snR46	Cntrl	EXO70	-3.58389	8.25824	7.84493e-07	8.04704e-05
YIL177C	Cntrl	EXO70	-8.9053	1.81027	8.75702e-07	8.83291e-05
JLP1:YLL057C	Cntrl	EXO70	4.34423	4.18263	9.60129e-07	9.52574e-05
STR3:YGL184C	Cntrl	EXO70	3.62137	6.93155	1.01927e-06	9.94942e-05
SNR189:snR189	Cntrl	EXO70	-3.47155	8.10575	1.53566e-06	0.000147521
SNR85:snR85	Cntrl	EXO70	-3.47957	6.87027	1.72239e-06	0.000156635
YPL257W-A	Cntrl	EXO70	-3.46322	7.37302	1.73407e-06	0.000156635
YER137C-A	Cntrl	EXO70	-3.46322	7.37302	1.73407e-06	0.000156635
YLR157C-A	Cntrl	EXO70	-3.46322	7.37302	1.73407e-06	0.000156635
BDS1:YOL164W	Cntrl	EXO70	3.54847	6.35059	1.95841e-06	0.000172487
SNR60:snR60	Cntrl	EXO70	-3.63762	4.6869	1.96655e-06	0.000172487
MTR4:YJL050W	Cntrl	EXO70	-3.68852	4.04739	2.09255e-06	0.000180916
MRD1:YPR112C	Cntrl	EXO70	-3.94614	3.23741	2.14878e-06	0.00018316
NME1	Cntrl	EXO70	-3.42215	7.36055	2.22316e-06	0.000186869
HCA4:YJL033W	Cntrl	EXO70	-4.01917	3.05224	2.52484e-06	0.000200818
AGA2:YGL032C	Cntrl	EXO70	5.3287	3.00844	2.53232e-06	0.000200818
YER159C-A	Cntrl	EXO70	-3.57295	4.58797	2.53418e-06	0.000200818
DBP2:YNL112W	Cntrl	EXO70	-3.49406	5.23889	2.5365e-06	0.000200818
SNR10:snR10	Cntrl	EXO70	-3.38454	8.22247	2.55502e-06	0.000200818
SYO1:YDL063C	Cntrl	EXO70	-4.97319	2.04455	2.84614e-06	0.000220831
SNR17B:snR17b	Cntrl	EXO70	-3.33044	11.585	3.14337e-06	0.000240806
YHR219W	Cntrl	EXO70	8.87937	2.48269	3.28997e-06	0.000248886
SNR30:snR30	Cntrl	EXO70	-3.31948	13.1378	3.33824e-06	0.00024942
AGP3:YFL055W	Cntrl	EXO70	3.59128	5.2411	3.52515e-06	0.000260174
KRE33:YNL132W	Cntrl	EXO70	-3.69422	3.86596	3.58054e-06	0.000261078
SNR31:snR31	Cntrl	EXO70	-3.32205	8.0234	3.74321e-06	0.000269689
SNR82:snR82	Cntrl	EXO70	-3.30308	9.65131	3.81713e-06	0.000270759
ENP2:YGR145W	Cntrl	EXO70	-4.22617	2.56275	3.84753e-06	0.000270759
FMP16:YDR070C	Cntrl	EXO70	4.37318	3.54357	3.93679e-06	0.000273856
SNR51:snR51	Cntrl	EXO70	-3.66386	3.83644	4.15033e-06	0.00028543
RDN5-6	Cntrl	EXO70	-8.63291	1.5152	4.27844e-06	0.000290934
ALD3:YMR169C	Cntrl	EXO70	3.42493	6.05656	4.3596e-06	0.000293159
DRS1:YLL008W	Cntrl	EXO70	-4.05125	2.93703	4.52111e-06	0.000300679
SNR76:snR76	Cntrl	EXO70	-4.18629	2.286	5.07388e-06	0.000333773
NQM1:YGR043C	Cntrl	EXO70	4.32883	3.50488	5.23089e-06	0.000340402
TLC1	Cntrl	EXO70	-3.25655	7.96673	5.35257e-06	0.000343777
RPA135:YPR010C	Cntrl	EXO70	-3.34507	5.6924	5.41858e-06	0.000343777
NOP1:YDL014W	Cntrl	EXO70	-3.41481	4.68023	5.45317e-06	0.000343777
YOL163W	Cntrl	EXO70	4.02364	3.89961	5.75593e-06	0.00035577
SNR17A:snR17a	Cntrl	EXO70	-3.22461	13.6991	5.76099e-06	0.00035577
SRP40:YKR092C	Cntrl	EXO70	-3.8618	2.8952	5.86541e-06	0.000358561
SNR36:snR36	Cntrl	EXO70	-3.37207	5.05418	6.10232e-06	0.000369312
SNR19:snR19	Cntrl	EXO70	-3.2197	9.53606	6.17972e-06	0.000370294
SNR24:snR24	Cntrl	EXO70	-3.93409	2.4755	6.65856e-06	0.000395075
HAS1:YMR290C	Cntrl	EXO70	-3.87061	3.03849	6.74835e-06	0.000396515
MFA1:YDR461W	Cntrl	EXO70	8.74379	2.36573	7.01868e-06	0.000408433
UTP5:YDR398W	Cntrl	EXO70	-3.69416	3.30873	7.20711e-06	0.000415404
YDR261W-A	Cntrl	EXO70	-4.08551	2.42107	8.36369e-06	0.000477519
SNR61:snR61	Cntrl	EXO70	-3.564	3.2754	8.87169e-06	0.000497143
PRM7:YDL039C	Cntrl	EXO70	-3.564	3.2754	8.87169e-06	0.000497143
DBP3:YGL078C	Cntrl	EXO70	-3.5685	3.36778	1.01786e-05	0.000562508
LIA1:YJR070C	Cntrl	EXO70	-3.70112	3.10949	1.0224e-05	0.000562508
SNR52:snR52	Cntrl	EXO70	-3.46571	3.77268	1.04626e-05	0.000570448
SNU13:YEL026W	Cntrl	EXO70	-3.88153	2.76745	1.1065e-05	0.000597905
DHR2:YKL078W	Cntrl	EXO70	-8.44078	1.31168	1.16786e-05	0.000620118
ECM16:YMR128W	Cntrl	EXO70	-3.60543	3.22215	1.17835e-05	0.000620118
SNR77:snR77	Cntrl	EXO70	-3.51896	3.23185	1.17835e-05	0.000620118
VHR2:YER064C	Cntrl	EXO70	-3.40605	3.65324	1.24499e-05	0.000649542
RPL6B:YLR448W	Cntrl	EXO70	-3.18312	5.44879	1.2855e-05	0.000664944
DUS3:YLR401C	Cntrl	EXO70	-3.62455	2.92028	1.3156e-05	0.000674749
SDA1:YGR245C	Cntrl	EXO70	-3.58237	3.19975	1.36213e-05	0.000692741
RTN2:YDL204W	Cntrl	EXO70	3.26203	5.51024	1.37762e-05	0.000694778
SNR4:snR4	Cntrl	EXO70	-3.05992	9.58401	1.48899e-05	0.000744742
MET1:YKR069W	Cntrl	EXO70	3.09712	6.92721	1.70349e-05	0.000845042
YCT1:YLL055W	Cntrl	EXO70	3.13607	6.26158	1.78645e-05	0.000878992
NOP7:YGR103W	Cntrl	EXO70	-3.36296	3.47886	1.93402e-05	0.000943928
YOL162W	Cntrl	EXO70	4.35965	3.01981	1.97128e-05	0.000954416
RDN58-1	Cntrl	EXO70	-3.00207	12.1081	2.02336e-05	0.000964205
RDN58-2	Cntrl	EXO70	-3.00207	12.1081	2.02336e-05	0.000964205
RPL15A:YLR029C	Cntrl	EXO70	-3.00695	8.11051	2.14755e-05	0.00101539
SNR50:snR50	Cntrl	EXO70	-3.32992	3.64335	2.20279e-05	0.00103343
NOG1:YPL093W	Cntrl	EXO70	-3.17266	4.48554	2.26607e-05	0.00105494
NUG1:YER006W	Cntrl	EXO70	-3.35393	3.32392	2.48467e-05	0.00114584
PNO1:YOR145C	Cntrl	EXO70	-3.8879	2.22558	2.49918e-05	0.00114584
ERB1:YMR049C	Cntrl	EXO70	-3.33833	3.52363	2.62128e-05	0.00118864
SNR79:snR79	Cntrl	EXO70	-3.87493	1.9796	2.65437e-05	0.00118864
BRX1:YOL077C	Cntrl	EXO70	-3.87493	1.9796	2.65437e-05	0.00118864
NOP13:YNL175C	Cntrl	EXO70	-3.51912	2.93259	2.69222e-05	0.00118864
RRP8:YDR083W	Cntrl	EXO70	-4.55906	1.62426	2.69459e-05	0.00118864
SNR39B:snR39B	Cntrl	EXO70	-3.14648	4.55242	2.71039e-05	0.00118864
RPA190:YOR341W	Cntrl	EXO70	-3.01752	5.71865	2.8153e-05	0.00122577
SNR63:snR63	Cntrl	EXO70	-2.93773	10.9002	2.89732e-05	0.00125247
RTC3:YHR087W	Cntrl	EXO70	3.10204	5.60626	2.92925e-05	0.00125729
PUF6:YDR496C	Cntrl	EXO70	-3.36706	3.17434	3.09271e-05	0.00131811
SNR72:snR72	Cntrl	EXO70	-4.10436	1.59964	3.23096e-05	0.0013579
TOD6:YBL054W	Cntrl	EXO70	-4.10436	1.59964	3.23096e-05	0.0013579
RGI1:YER067W	Cntrl	EXO70	3.02179	5.9815	3.50487e-05	0.00146286
RKI1:YOR095C	Cntrl	EXO70	-4.07865	1.90376	3.59785e-05	0.00149138
SCR1	Cntrl	EXO70	-2.89427	12.7491	3.65598e-05	0.00150025
ALY2:YJL084C	Cntrl	EXO70	-2.93053	6.87431	3.66883e-05	0.00150025
SNR47:snR47	Cntrl	EXO70	-3.25585	3.63342	3.77353e-05	0.00153271
FMP45:YDL222C	Cntrl	EXO70	3.10314	5.14948	3.9261e-05	0.00158405
RLP7:YNL002C	Cntrl	EXO70	-3.52998	2.70537	4.31467e-05	0.00171676
NOP14:YDL148C	Cntrl	EXO70	-3.52998	2.70537	4.31467e-05	0.00171676
RPL14A:YKL006W	Cntrl	EXO70	-2.94445	5.47148	4.34011e-05	0.00171676
RRP12:YPL012W	Cntrl	EXO70	-3.10804	3.76388	4.61122e-05	0.00181215
UTP20:YBL004W	Cntrl	EXO70	-2.92557	5.46828	5.06135e-05	0.00197621
RPL29:YFR032C-A	Cntrl	EXO70	-3.01958	4.34466	5.24102e-05	0.00203325
RPS26B:YER131W	Cntrl	EXO70	-2.95008	4.868	5.58948e-05	0.00215462
EFG1:YGR271C-A	Cntrl	EXO70	-4.51866	1.0256	5.79138e-05	0.00221832
RPL34B:YIL052C	Cntrl	EXO70	-2.86591	5.76557	6.04946e-05	0.0023026
RPL20B:YOR312C	Cntrl	EXO70	-2.8753	5.70802	6.14271e-05	0.00232348
HMS1:YOR032C	Cntrl	EXO70	3.15286	4.30631	6.51977e-05	0.00245078
RPS9B:YBR189W	Cntrl	EXO70	-2.84209	5.85795	6.60094e-05	0.00246598
YBR012W-A	Cntrl	EXO70	-3.12755	3.25763	6.6555e-05	0.00247111
RPS21B:YJL136C	Cntrl	EXO70	-3.00063	4.12588	7.34466e-05	0.00271036
SNR65:snR65	Cntrl	EXO70	-5.39897	0.970659	7.44607e-05	0.00273113
SNR64:snR64	Cntrl	EXO70	-3.21592	3.1149	7.70854e-05	0.00279256
SPB1:YCL054W	Cntrl	EXO70	-3.18828	3.00601	7.76435e-05	0.00279256
AFB1:YLR040C	Cntrl	EXO70	-3.24325	2.87628	7.81216e-05	0.00279256
RPS24A:YER074W	Cntrl	EXO70	-2.85074	5.2271	7.85553e-05	0.00279256
RPS8B:YER102W	Cntrl	EXO70	-2.82182	5.62635	7.90034e-05	0.00279256
GUA1:YMR217W	Cntrl	EXO70	-2.85186	5.11585	8.02434e-05	0.00279256
DBP7:YKR024C	Cntrl	EXO70	-3.66129	1.77749	8.02885e-05	0.00279256
SNR6:snR6	Cntrl	EXO70	-3.66129	1.77749	8.02885e-05	0.00279256
SNR39:snR39	Cntrl	EXO70	-3.66129	1.77749	8.02885e-05	0.00279256
MDN1:YLR106C	Cntrl	EXO70	-2.76261	7.52581	8.22053e-05	0.00284289
RPL19B:YBL027W	Cntrl	EXO70	-2.79191	6.05109	8.45867e-05	0.0028945
RPL8A:YHL033C	Cntrl	EXO70	-2.81841	5.51584	8.46541e-05	0.0028945
RPS16B:YDL083C	Cntrl	EXO70	-2.82979	5.32692	8.87041e-05	0.00300672
FMO1:YHR176W	Cntrl	EXO70	2.95137	4.95753	8.89296e-05	0.00300672
SNR69:snR69	Cntrl	EXO70	-2.98244	3.91732	8.98866e-05	0.00302219
YHR218W	Cntrl	EXO70	-8.04976	0.91292	9.63608e-05	0.00318524
UTP23:YOR004W	Cntrl	EXO70	-5.30622	0.883363	9.63608e-05	0.00318524
CMS1:YLR003C	Cntrl	EXO70	-4.42592	0.941696	9.63608e-05	0.00318524
NOG2:YNR053C	Cntrl	EXO70	-3.05639	3.38769	9.68414e-05	0.00318524
RPL23B:YER117W	Cntrl	EXO70	-2.8046	4.89657	0.000103403	0.00338267
SNR55:snR55	Cntrl	EXO70	-2.89848	4.06859	0.00010589	0.00344542
RPL27A:YHR010W	Cntrl	EXO70	-2.8075	5.09289	0.000106891	0.00345938
AAH1:YNL141W	Cntrl	EXO70	-3.06472	3.05343	0.000112823	0.00363195
RPS12:YOR369C	Cntrl	EXO70	-2.70573	7.08474	0.000114237	0.003658
RPS17A:YML024W	Cntrl	EXO70	-2.75819	5.46255	0.000115397	0.00367569
YDR365W-A	Cntrl	EXO70	-2.73826	5.49376	0.000122741	0.00388916
NOP2:YNL061W	Cntrl	EXO70	-2.91074	3.58308	0.000127096	0.00399218
RRT13:YER066W	Cntrl	EXO70	8.10625	1.82283	0.000127312	0.00399218
RPL1B:YGL135W	Cntrl	EXO70	-2.70589	6.26484	0.000130205	0.00404279
RPS11A:YDR025W	Cntrl	EXO70	-2.76252	5.16409	0.000130262	0.00404279
RPL32:YBL092W	Cntrl	EXO70	-2.69786	6.29865	0.000131329	0.00405511
RPS0A:YGR214W	Cntrl	EXO70	-2.68628	6.12537	0.000143025	0.00439384
UTP4:YDR324C	Cntrl	EXO70	-3.12056	2.76247	0.000145838	0.00444172
PWP1:YLR196W	Cntrl	EXO70	-3.04738	3.11232	0.000146586	0.00444172
RPS18A:YDR450W	Cntrl	EXO70	-2.70969	5.35646	0.000146785	0.00444172
SAS10:YDL153C	Cntrl	EXO70	-3.17266	2.49244	0.000148152	0.00446077
NOP56:YLR197W	Cntrl	EXO70	-2.78404	4.39039	0.00015224	0.00453276
RPL7B:YPL198W	Cntrl	EXO70	-2.90315	3.62456	0.000152618	0.00453276
RPL8B:YLL045C	Cntrl	EXO70	-2.65236	6.75876	0.000153408	0.00453276
RPL7A:YGL076C	Cntrl	EXO70	-2.67035	6.37194	0.000153539	0.00453276
DIM1:YPL266W	Cntrl	EXO70	-3.35357	2.09971	0.000168571	0.00495237
ADY2:YCR010C	Cntrl	EXO70	3.65161	2.92435	0.000171134	0.00500341
MAK21:YDR060W	Cntrl	EXO70	-2.81592	3.80711	0.000173661	0.00505288
RPS17B:YDR447C	Cntrl	EXO70	-2.89891	3.5224	0.000178899	0.00518036
NOP58:YOR310C	Cntrl	EXO70	-2.73157	4.44551	0.000180797	0.00521038
RPL39:YJL189W	Cntrl	EXO70	-3.05564	2.96643	0.000181665	0.0052106
KAP123:YER110C	Cntrl	EXO70	-2.65728	5.63445	0.000183297	0.00521352
LHP1:YDL051W	Cntrl	EXO70	-2.99497	3.0644	0.000183788	0.00521352
PHM7:YOL084W	Cntrl	EXO70	2.6888	5.98192	0.000184351	0.00521352
RDN37-2	Cntrl	EXO70	-2.58586	16.0254	0.000187495	0.00525333
RDN37-1	Cntrl	EXO70	-2.58586	16.0254	0.000187495	0.00525333
RPF2:YKR081C	Cntrl	EXO70	-3.47734	1.60981	0.000191901	0.00532744
SNR78:snR78	Cntrl	EXO70	-3.47734	1.60981	0.000191901	0.00532744
ROK1:YGL171W	Cntrl	EXO70	-3.75177	1.27514	0.000195424	0.00540047
RPL25:YOL127W	Cntrl	EXO70	-2.64196	5.47965	0.000211185	0.0058095
RPL2A:YFR031C-A	Cntrl	EXO70	-2.60888	6.05809	0.000212854	0.00582893
DBP9:YLR276C	Cntrl	EXO70	-2.99799	2.91382	0.000232468	0.00628281
YTM1:YOR272W	Cntrl	EXO70	-3.10464	2.54349	0.000232936	0.00628281
RPS19A:YOL121C	Cntrl	EXO70	-2.69705	4.43938	0.000233412	0.00628281
RPR1	Cntrl	EXO70	-2.55717	7.77786	0.000233581	0.00628281
RPL12B:YDR418W	Cntrl	EXO70	-2.63516	5.25181	0.000235621	0.00630965
RPL43A:YPR043W	Cntrl	EXO70	-2.59765	5.64351	0.000237399	0.00632925
RPL13A:YDL082W	Cntrl	EXO70	-2.62012	5.11355	0.00024069	0.00638885
REI1:YBR267W	Cntrl	EXO70	-3.44522	1.80737	0.000247831	0.00654965
ADH5:YBR145W	Cntrl	EXO70	2.85375	4.35302	0.000248995	0.00655182
ARX1:YDR101C	Cntrl	EXO70	-2.95251	2.78992	0.000254949	0.00667946
CBF5:YLR175W	Cntrl	EXO70	-2.67225	4.53364	0.000259527	0.00677008
RPS14B:YJL191W	Cntrl	EXO70	-2.89129	3.10975	0.00026725	0.00694161
YGL088W	Cntrl	EXO70	-3.66465	1.51406	0.000277936	0.00718834
ERG2:YMR202W	Cntrl	EXO70	-2.61972	4.5531	0.000290076	0.00746616
RPL36B:YPL249C-A	Cntrl	EXO70	-2.56684	5.70368	0.000291146	0.00746616
IME4:YGL192W	Cntrl	EXO70	3.26667	3.25061	0.00029335	0.00747043
RPL6A:YML073C	Cntrl	EXO70	-2.55401	5.72043	0.000293781	0.00747043
DLS1:YJL065C	Cntrl	EXO70	7.93006	1.675	0.000305695	0.00770861
EFM4:YIL064W	Cntrl	EXO70	-4.06305	1.15554	0.000305695	0.00770861
RPL22A:YLR061W	Cntrl	EXO70	-2.63051	4.60461	0.000310146	0.00778841
PRP43:YGL120C	Cntrl	EXO70	-2.72165	3.87472	0.000314699	0.00787006
RPL21B:YPL079W	Cntrl	EXO70	-2.58194	5.03612	0.000318628	0.00790602
MSC1:YML128C	Cntrl	EXO70	2.52193	7.0845	0.000318749	0.00790602
RIX1:YHR197W	Cntrl	EXO70	-3.12622	2.32818	0.000327712	0.00809516
TMA17:YDL110C	Cntrl	EXO70	2.94609	3.74833	0.000329308	0.00810152
RPL23A:YBL087C	Cntrl	EXO70	-2.63957	4.20906	0.000330916	0.00810811
SNR75:snR75	Cntrl	EXO70	-3.34023	1.48907	0.000336207	0.00817159
MAK16:YAL025C	Cntrl	EXO70	-3.34023	1.48907	0.000336207	0.00817159
RSA4:YCR072C	Cntrl	EXO70	-3.20189	1.9624	0.000341233	0.00826057
RPS1B:YML063W	Cntrl	EXO70	-2.49366	6.58857	0.000344917	0.00831648
UTP14:YML093W	Cntrl	EXO70	-2.90696	2.83168	0.000355341	0.00851222
LSR1	Cntrl	EXO70	-2.46015	11.0494	0.000357214	0.00851222
SNR191:snR191	Cntrl	EXO70	-2.46998	8.0149	0.000358344	0.00851222
SNR40:snR40	Cntrl	EXO70	-2.5616	4.77443	0.000358661	0.00851222
FUN12:YAL035W	Cntrl	EXO70	-2.48602	6.67613	0.000365877	0.00864955
SNR38:snR38	Cntrl	EXO70	-3.08323	2.28946	0.000368942	0.00868809
SNR58:snR58	Cntrl	EXO70	-3.97591	1.07799	0.000385253	0.00902292
SSB1:YDL229W	Cntrl	EXO70	-2.45753	7.85405	0.000386143	0.00902292
SNR87:snR87	Cntrl	EXO70	-4.10544	0.665613	0.000390825	0.0090972
RPL26B:YGR034W	Cntrl	EXO70	-2.52737	5.24881	0.000393906	0.00913379
RPL24B:YGR148C	Cntrl	EXO70	-2.51854	5.1374	0.000408762	0.0094421
ATG41:YPL250C	Cntrl	EXO70	2.55212	5.338	0.000411901	0.00947841
RPL18B:YNL301C	Cntrl	EXO70	-2.61988	3.71139	0.000419412	0.0096147
RPS25B:YLR333C	Cntrl	EXO70	-2.63854	3.87186	0.000423974	0.0096826
RPL19A:YBR084C-A	Cntrl	EXO70	-2.48724	5.63527	0.000431817	0.00982464
RPL36A:YMR194W	Cntrl	EXO70	-2.65535	3.81627	0.000436136	0.00988575
RPL30:YGL030W	Cntrl	EXO70	-2.47763	5.34912	0.000456838	0.0102877
BSC1:YDL037C	Cntrl	EXO70	-3.14757	1.91423	0.000458791	0.0102877
RPL28:YGL103W	Cntrl	EXO70	-2.44286	6.43423	0.000458968	0.0102877
VAR1:Q0140	Cntrl	EXO70	-3.03891	2.24987	0.000469533	0.01045
RPS27B:YHR021C	Cntrl	EXO70	-2.53677	4.66156	0.000469663	0.01045
RPL37A:YLR185W	Cntrl	EXO70	-2.54709	4.3559	0.000473446	0.0104956
RPS0B:YLR048W	Cntrl	EXO70	-2.44812	6.05629	0.000477985	0.0105575
RPS20:YHL015W	Cntrl	EXO70	-2.44053	6.31188	0.000481314	0.0105924
RPL33A:YPL143W	Cntrl	EXO70	-2.4964	4.80418	0.000487715	0.0106944
RPS7A:YOR096W	Cntrl	EXO70	-2.43383	6.21796	0.000493116	0.0107738
RPL16A:YIL133C	Cntrl	EXO70	-2.46495	5.18269	0.000520397	0.0113222
RPS15:YOL040C	Cntrl	EXO70	-2.41997	6.24806	0.00052196	0.0113222
SNR54:snR54	Cntrl	EXO70	-7.63654	0.519326	0.000530405	0.0114525
BMS1:YPL217C	Cntrl	EXO70	-2.56678	4.03198	0.000531751	0.0114525
RPS25A:YGR027C	Cntrl	EXO70	-2.46544	5.13166	0.000536786	0.01152
RPL40B:YKR094C	Cntrl	EXO70	-2.48031	4.80698	0.000555323	0.0118719
RPL24A:YGL031C	Cntrl	EXO70	-2.43227	5.46119	0.0005578	0.0118719
SNR83:snR83	Cntrl	EXO70	-2.37279	9.12819	0.000559072	0.0118719
RPL18A:YOL120C	Cntrl	EXO70	-2.39965	6.53764	0.000564497	0.0119452
YPR137C-B	Cntrl	EXO70	-2.3663	10.7973	0.000569735	0.0120141
RPA49:YNL248C	Cntrl	EXO70	-2.83858	2.5091	0.000575736	0.0120985
YEF3:YLR249W	Cntrl	EXO70	-2.36341	9.32958	0.000583963	0.0122289
YNL195C	Cntrl	EXO70	2.69454	4.0278	0.000590535	0.0123239
RPL37B:YDR500C	Cntrl	EXO70	-2.4994	4.05978	0.000604987	0.0125821
CHA1:YCL064C	Cntrl	EXO70	2.85467	3.51742	0.000610422	0.0126516
OPI8:YKR035C	Cntrl	EXO70	7.72931	1.50788	0.000621965	0.0127664
RPM1:Q0285	Cntrl	EXO70	-2.80878	2.38531	0.000622782	0.0127664
RPL34A:YER056C-A	Cntrl	EXO70	-2.47859	4.34294	0.000623142	0.0127664
YFR052C-A	Cntrl	EXO70	2.67293	4.10924	0.000624398	0.0127664
RPS6A:YPL090C	Cntrl	EXO70	-2.39405	5.73216	0.000647199	0.013188
RPL38:YLR325C	Cntrl	EXO70	-2.4063	4.94408	0.000713122	0.0144826
SNR66:snR66	Cntrl	EXO70	-2.82793	2.59192	0.000720674	0.0144973
FPR4:YLR449W	Cntrl	EXO70	-2.74636	2.60758	0.000720674	0.0144973
RPS2:YGL123W	Cntrl	EXO70	-2.33521	7.3258	0.000725686	0.0144973
RPA12:YJR063W	Cntrl	EXO70	-3.98057	0.564114	0.000726851	0.0144973
KRR1:YCL059C	Cntrl	EXO70	-3.03237	1.81396	0.000727001	0.0144973
GAD1:YMR250W	Cntrl	EXO70	2.37779	6.34359	0.000728217	0.0144973
RPS3:YNL178W	Cntrl	EXO70	-2.34491	6.50107	0.000730975	0.0145045
EFB1:YAL003W	Cntrl	EXO70	-2.33373	6.44356	0.000762476	0.0150801
RPL21A:YBR191W	Cntrl	EXO70	-2.36388	5.47316	0.000769878	0.0151769
RPS14A:YCR031C	Cntrl	EXO70	-2.33885	6.06313	0.000780363	0.015331
RPS31:YLR167W	Cntrl	EXO70	-2.32038	6.87569	0.000788964	0.015331
YGR038C-B	Cntrl	EXO70	-2.32314	6.77734	0.000790054	0.015331
YNL054W-A	Cntrl	EXO70	-2.59245	3.39585	0.000790922	0.015331
TKL2:YBR117C	Cntrl	EXO70	2.55735	4.35269	0.000793797	0.015331
RRB1:YMR131C	Cntrl	EXO70	-2.55931	3.17103	0.000796013	0.015331
YLR410W-A	Cntrl	EXO70	7.69296	1.47777	0.000797167	0.015331
RPS10A:YOR293W	Cntrl	EXO70	-2.44382	4.14517	0.000797962	0.015331
ASC1:YMR116C	Cntrl	EXO70	-2.30993	7.35947	0.000818677	0.0156564
RPS18B:YML026C	Cntrl	EXO70	-2.37272	4.87181	0.00082073	0.0156564
CTT1:YGR088W	Cntrl	EXO70	2.41626	5.33362	0.000822659	0.0156564
DDR2:YOL052C-A	Cntrl	EXO70	2.81436	3.30992	0.000858637	0.0162899
RPL17B:YJL177W	Cntrl	EXO70	-2.36203	4.93511	0.000871977	0.0164913
NMD3:YHR170W	Cntrl	EXO70	-2.50233	3.57135	0.000875267	0.0165019
NSA2:YER126C	Cntrl	EXO70	-2.72148	2.31036	0.000883102	0.0165979
RPS8A:YBL072C	Cntrl	EXO70	-2.30944	6.33753	0.000888034	0.0166389
EGO4:YNR034W-A	Cntrl	EXO70	2.7327	3.57138	0.000893946	0.016698
RPL5:YPL131W	Cntrl	EXO70	-2.28568	7.55524	0.000898585	0.016733
UTP13:YLR222C	Cntrl	EXO70	-2.60697	3.04609	0.00092503	0.0171726
MAK5:YBR142W	Cntrl	EXO70	-2.60024	2.78648	0.000953685	0.0176505
CAT2:YML042W	Cntrl	EXO70	2.61071	3.85188	0.000956872	0.0176554
RPS5:YJR123W	Cntrl	EXO70	-2.27376	7.23413	0.000966481	0.0177563
TIF4631:YGR162W	Cntrl	EXO70	-2.31737	5.61697	0.000968207	0.0177563
RPS29B:YDL061C	Cntrl	EXO70	-2.35536	4.68411	0.00097698	0.0178631
RPS6B:YBR181C	Cntrl	EXO70	-2.29793	5.881	0.000986273	0.0179366
RPS22B:YLR367W	Cntrl	EXO70	-2.49431	3.48481	0.00098729	0.0179366
RPL12A:YEL054C	Cntrl	EXO70	-2.3104	5.37865	0.000989893	0.0179366
YIR042C	Cntrl	EXO70	3.26897	2.60516	0.000994699	0.0179699
FAL1:YDR021W	Cntrl	EXO70	-3.84385	0.457034	0.00100641	0.0181273
SPO22:YIL073C	Cntrl	EXO70	2.57163	4.02574	0.00101144	0.0181639
YDL172C	Cntrl	EXO70	-3.39059	0.968932	0.00102803	0.0184072
SRO9:YCL037C	Cntrl	EXO70	-2.40637	3.77137	0.00103398	0.0184592
YIL165C	Cntrl	EXO70	2.73932	3.42236	0.00104074	0.0185252
RPS4A:YJR145C	Cntrl	EXO70	-2.26866	6.47018	0.00105616	0.0187445
EBP2:YKL172W	Cntrl	EXO70	-2.57843	3.02154	0.00107529	0.0190282
RPL16B:YNL069C	Cntrl	EXO70	-2.27889	6.02573	0.0010828	0.0191053
YNL143C	Cntrl	EXO70	-2.54544	2.93379	0.00109515	0.0192117
YPL257W-B	Cntrl	EXO70	-2.23209	9.85994	0.00109518	0.0192117
RPL10:YLR075W	Cntrl	EXO70	-2.24696	7.29945	0.00109982	0.0192374
RPS22A:YJL190C	Cntrl	EXO70	-2.2873	5.38929	0.00112049	0.0195425
NOC2:YOR206W	Cntrl	EXO70	-2.43052	3.58574	0.0011337	0.0197159
GPH1:YPR160W	Cntrl	EXO70	2.24669	7.49815	0.00114428	0.0198
RPL43B:YJR094W-A	Cntrl	EXO70	-2.37249	4.15898	0.00114508	0.0198
COX26:YDR119W-A	Cntrl	EXO70	3.50675	2.30141	0.00116281	0.0199924
YDR098C-A	Cntrl	EXO70	-2.80703	1.91928	0.00116281	0.0199924
TEF4:YKL081W	Cntrl	EXO70	-2.24017	6.62895	0.00119317	0.0204379
RPL9B:YNL067W	Cntrl	EXO70	-2.3364	4.33138	0.0011982	0.0204379
PHO88:YBR106W	Cntrl	EXO70	-2.29503	4.94774	0.00119885	0.0204379
GAR1:YHR089C	Cntrl	EXO70	-2.56976	2.82796	0.00121658	0.0206819
NIT1:YIL164C	Cntrl	EXO70	2.4188	4.38203	0.00122844	0.020825
SER33:YIL074C	Cntrl	EXO70	2.2355	7.17719	0.00123282	0.0208408
RPS27A:YKL156W	Cntrl	EXO70	-2.46965	3.24386	0.00124941	0.0210625
RPL42A:YNL162W	Cntrl	EXO70	-2.30682	4.60952	0.00125777	0.0211445
HMT1:YBR034C	Cntrl	EXO70	-2.48427	3.15843	0.0012802	0.0214619
NOP12:YOL041C	Cntrl	EXO70	-2.55844	2.60664	0.00128742	0.0214833
RPS21A:YKR057W	Cntrl	EXO70	-2.32615	4.38457	0.00128857	0.0214833
RPL27B:YDR471W	Cntrl	EXO70	-2.30576	4.28449	0.0012985	0.0215894
RPP2A:YOL039W	Cntrl	EXO70	-2.24313	5.66268	0.00131117	0.0217403
RRS1:YOR294W	Cntrl	EXO70	-3.67761	0.824755	0.00133434	0.0220066
RPS11B:YBR048W	Cntrl	EXO70	-2.2628	5.0372	0.00133451	0.0220066
UTP10:YJL109C	Cntrl	EXO70	-2.26868	5.11478	0.00134096	0.022053
HBT1:YDL223C	Cntrl	EXO70	2.29613	5.36777	0.00135439	0.0222135
SNR62:snR62	Cntrl	EXO70	-4.72416	0.375096	0.00140897	0.0228994
RPS7B:YNL096C	Cntrl	EXO70	-2.26523	4.75167	0.00141218	0.0228994
RPS23B:YPR132W	Cntrl	EXO70	-2.23347	5.41211	0.00141817	0.0228994
YHR138C	Cntrl	EXO70	4.00443	1.88642	0.00141891	0.0228994
GFD2:YCL036W	Cntrl	EXO70	-3.26646	1.4257	0.00141891	0.0228994
BUD22:YMR014W	Cntrl	EXO70	-3.05039	1.46411	0.00141891	0.0228994
TIF1:YKR059W	Cntrl	EXO70	-2.20679	6.09901	0.00145434	0.0234087
PPT1:YGR123C	Cntrl	EXO70	-2.51961	2.97135	0.00146236	0.0234753
TSR1:YDL060W	Cntrl	EXO70	-2.45058	3.27433	0.00147995	0.0236949
PWP2:YCR057C	Cntrl	EXO70	-2.36829	3.53326	0.00148753	0.0237534
RPS16A:YMR143W	Cntrl	EXO70	-2.22369	5.23408	0.00149254	0.0237706
OPT1:YJL212C	Cntrl	EXO70	2.23162	5.96601	0.00152226	0.0241803
RPS29A:YLR388W	Cntrl	EXO70	-2.41502	3.3334	0.0015291	0.0242255
RPL11B:YGR085C	Cntrl	EXO70	-2.24182	4.65447	0.00154694	0.024444
RPL13B:YMR142C	Cntrl	EXO70	-2.18281	6.44032	0.00156337	0.0246096
CIC1:YHR052W	Cntrl	EXO70	-2.88334	1.84259	0.00156555	0.0246096
YLL058W	Cntrl	EXO70	2.47453	3.9464	0.0015989	0.0250687
YLR198C	Cntrl	EXO70	-3.00646	1.61967	0.001642	0.0256118
GRC3:YLL035W	Cntrl	EXO70	-2.84024	1.65274	0.001642	0.0256118
YHR214C-C	Cntrl	EXO70	-2.18901	5.45788	0.0017237	0.0268171
YBR116C	Cntrl	EXO70	7.49604	1.31563	0.00174368	0.0270583
RPL17A:YKL180W	Cntrl	EXO70	-2.1773	5.61629	0.00183974	0.028421
YKL202W	Cntrl	EXO70	3.12077	2.48332	0.00184089	0.028421
RPS24B:YIL069C	Cntrl	EXO70	-2.2207	4.53787	0.00186703	0.0287513
SNR42:snR42	Cntrl	EXO70	-2.12378	8.23337	0.00188095	0.0288451
NEW1:YPL226W	Cntrl	EXO70	-2.16685	5.6774	0.00188289	0.0288451
PHO3:YBR092C	Cntrl	EXO70	-2.32081	3.37894	0.00188742	0.0288451
RPL31A:YDL075W	Cntrl	EXO70	-2.20495	4.88631	0.00190003	0.0289454
TAT1:YBR069C	Cntrl	EXO70	-2.27388	3.97639	0.00190355	0.0289454
RPL2B:YIL018W	Cntrl	EXO70	-2.12385	7.04077	0.00196486	0.0298028
NOP4:YPL043W	Cntrl	EXO70	-2.48869	2.62201	0.00199246	0.0299011
UTP7:YER082C	Cntrl	EXO70	-2.42217	2.63716	0.00199246	0.0299011
YGL152C	Cntrl	EXO70	-7.37495	0.287187	0.00199604	0.0299011
HMLALPHA1:YCL066W	Cntrl	EXO70	-7.22391	0.159587	0.00199604	0.0299011
MATALPHA1:YCR040W	Cntrl	EXO70	-7.22391	0.159587	0.00199604	0.0299011
RPP0:YLR340W	Cntrl	EXO70	-2.10584	7.94423	0.00205218	0.0306662
HIS4:YCL030C	Cntrl	EXO70	2.12482	7.17149	0.00205883	0.0306897
RTT10:YPL183C	Cntrl	EXO70	-2.28539	3.63761	0.00206611	0.0307227
YBR285W	Cntrl	EXO70	3.92068	1.81763	0.00208845	0.030903
IRC9:YJL142C	Cntrl	EXO70	3.89164	1.79386	0.00208845	0.030903
ZPR1:YGR211W	Cntrl	EXO70	-2.21134	4.16279	0.00209861	0.0309776
RMT2:YDR465C	Cntrl	EXO70	-2.8221	1.79145	0.00212562	0.0312624
GDB1:YPR184W	Cntrl	EXO70	2.10793	7.5995	0.00212824	0.0312624
UTP8:YGR128C	Cntrl	EXO70	-2.53656	2.25274	0.00219265	0.0320529
TMA46:YOR091W	Cntrl	EXO70	-2.53656	2.25274	0.00219265	0.0320529
RPL4B:YDR012W	Cntrl	EXO70	-2.10265	6.68173	0.00220113	0.0320994
VBA2:YBR293W	Cntrl	EXO70	2.28825	4.27624	0.00225846	0.0328563
RPC40:YPR110C	Cntrl	EXO70	-2.31104	3.33059	0.00226773	0.032912
INA1:YLR413W	Cntrl	EXO70	-2.16509	4.63835	0.00229025	0.0331465
REX4:YOL080C	Cntrl	EXO70	-3.56269	0.732465	0.00229484	0.0331465
RTC2:YBR147W	Cntrl	EXO70	2.32917	4.00785	0.00230072	0.0331523
TRM11:YOL124C	Cntrl	EXO70	-2.93628	1.56137	0.00231637	0.0332196
RLP24:YLR009W	Cntrl	EXO70	-2.77006	1.59582	0.00231637	0.0332196
KRI1:YNL308C	Cntrl	EXO70	-2.30477	3.19776	0.0023467	0.0334958
SAP185:YJL098W	Cntrl	EXO70	-2.30477	3.19776	0.0023467	0.0334958
RPL40A:YIL148W	Cntrl	EXO70	-2.12027	5.38363	0.00235984	0.0336042
RPL14B:YHL001W	Cntrl	EXO70	-2.21765	4.05376	0.00239848	0.0340742
UTP25:YIL091C	Cntrl	EXO70	-2.38375	2.60571	0.00241472	0.0342246
YDR366C	Cntrl	EXO70	-2.1072	5.73081	0.00244667	0.0345964
RPL33B:YOR234C	Cntrl	EXO70	-2.2582	3.44185	0.0024686	0.0348251
RDN25-1	Cntrl	EXO70	-2.05361	18.0503	0.00248211	0.0348532
RDN25-2	Cntrl	EXO70	-2.05361	18.0503	0.00248211	0.0348532
NIP7:YPL211W	Cntrl	EXO70	-2.89047	1.33447	0.00254733	0.035552
RNT1:YMR239C	Cntrl	EXO70	-2.89047	1.33447	0.00254733	0.035552
RPS4B:YHR203C	Cntrl	EXO70	-2.08237	6.05946	0.0025495	0.035552
TIF3:YPR163C	Cntrl	EXO70	-2.14847	4.6092	0.00262014	0.0364531
RPP1B:YDL130W	Cntrl	EXO70	-2.08362	5.60194	0.00267977	0.0371516
SSB2:YNL209W	Cntrl	EXO70	-2.04534	8.02179	0.00268293	0.0371516
IRR1:YIL026C	Cntrl	EXO70	-2.06458	6.39697	0.00268876	0.0371516
RBG1:YAL036C	Cntrl	EXO70	-2.48775	2.21296	0.00278678	0.0384181
BNA3:YJL060W	Cntrl	EXO70	2.05212	6.99327	0.00286674	0.0394307
YNL194C	Cntrl	EXO70	2.19236	4.55681	0.0028974	0.039762
YLR154C-H	Cntrl	EXO70	3.2484	2.08976	0.00291167	0.0398675
ARG7:YMR062C	Cntrl	EXO70	2.08654	5.72282	0.00296804	0.0404725
POT1:YIL160C	Cntrl	EXO70	2.57939	2.91954	0.00296923	0.0404725
RPS30A:YLR287C-A	Cntrl	EXO70	-2.13389	4.44942	0.0029854	0.0406014
DBP8:YHR169W	Cntrl	EXO70	-2.62479	1.89768	0.00301688	0.0409376
YLR157C-B	Cntrl	EXO70	7.36355	1.20747	0.00304285	0.0411976
RPL1A:YPL220W	Cntrl	EXO70	-2.04711	5.86084	0.00309809	0.0418519
RPL35B:YDL136W	Cntrl	EXO70	-2.16231	3.805	0.00314892	0.0424438
YGL117W	Cntrl	EXO70	2.13494	4.91991	0.00317382	0.0426843
TRM82:YDR165W	Cntrl	EXO70	-2.41573	2.33058	0.00318886	0.0427915
RRP9:YPR137W	Cntrl	EXO70	-2.42854	2.42191	0.0032194	0.0431058
BUD19:YJL188C	Cntrl	EXO70	-2.37155	2.72681	0.00327265	0.0436412
RPS28A:YOR167C	Cntrl	EXO70	-2.10925	4.18532	0.00327929	0.0436412
MDM31:YHR194W	Cntrl	EXO70	2.50444	3.05795	0.00328243	0.0436412
ARG4:YHR018C	Cntrl	EXO70	2.0236	6.79036	0.00328824	0.0436412
DBP10:YDL031W	Cntrl	EXO70	-2.26523	3.12031	0.00330161	0.0436686
YGR079W	Cntrl	EXO70	-2.69629	1.53717	0.00330473	0.0436686
BUD20:YLR074C	Cntrl	EXO70	-2.55615	1.71604	0.00341955	0.0450143
SAH1:YER043C	Cntrl	EXO70	-1.99693	7.19774	0.00342553	0.0450143
MAE1:YKL029C	Cntrl	EXO70	-2.06375	4.6603	0.00342888	0.0450143
ATO2:YNR002C	Cntrl	EXO70	2.4454	3.18385	0.00355584	0.04658
MRT4:YKL009W	Cntrl	EXO70	-2.45009	2.27293	0.00357514	0.0467101
NOP9:YJL010C	Cntrl	EXO70	-2.32016	2.62101	0.00358121	0.0467101
GPP1:YIL053W	Cntrl	EXO70	-2.00547	5.88832	0.00359292	0.0467621
RPS13:YDR064W	Cntrl	EXO70	-2.01403	5.60537	0.00373839	0.048551
NCE103:YNL036W	Cntrl	EXO70	2.11071	4.73315	0.00380572	0.0493022
YJR096W	Cntrl	EXO70	2.21299	3.82831	0.00381783	0.0493022
YOR309C	Cntrl	EXO70	-3.0194	1.22205	0.00383276	0.0493022
RRP15:YPR143W	Cntrl	EXO70	-2.80332	1.26627	0.00383276	0.0493022
NAN1:YPL126W	Cntrl	EXO70	-2.15399	3.62494	0.00383697	0.0493022
MIS1:YBR084W	Cntrl	EXO70	-2.04531	4.54111	0.00385277	0.0494003
RPS19B:YNL302C	Cntrl	EXO70	-2.00706	5.19903	0.00386646	0.0494711
YLR076C	Cntrl	EXO70	-2.08563	4.14565	0.0039226	0.0500835
RPL20A:YMR242C	Cntrl	EXO70	-2.00983	5.3475	0.00398003	0.0507097
LSG1:YGL099W	Cntrl	EXO70	-2.38423	2.38608	0.00398913	0.0507189
YLL067C	Cntrl	EXO70	-2.14514	3.23573	0.00400799	0.0507552
RPS1A:YLR441C	Cntrl	EXO70	-1.96894	6.79625	0.00400937	0.0507552
RPL41B:YDL133C-A	Cntrl	EXO70	-2.10608	3.96275	0.00402182	0.0507552
SHH4:YLR164W	Cntrl	EXO70	3.20046	2.05082	0.00402553	0.0507552
URB1:YKL014C	Cntrl	EXO70	-2.06092	4.10492	0.00408912	0.0514498
tE(UUC)L	Cntrl	EXO70	-7.05519	0.0227968	0.00416566	0.0523041
WRS1:YOL097C	Cntrl	EXO70	-2.10169	3.70047	0.00418068	0.052384
IMD3:YLR432W	Cntrl	EXO70	-2.00157	5.11557	0.00421083	0.0526528
PGM2:YMR105C	Cntrl	EXO70	1.95554	7.20596	0.0042504	0.053038
TRM1:YDR120C	Cntrl	EXO70	-2.18919	2.91544	0.00448249	0.055765
RPL9A:YGL147C	Cntrl	EXO70	-1.96356	5.78139	0.00448737	0.055765
ENP1:YBR247C	Cntrl	EXO70	-3.28415	0.88423	0.00455058	0.0561544
ALB1:YJL122W	Cntrl	EXO70	-3.28415	0.88423	0.00455058	0.0561544
DCS2:YOR173W	Cntrl	EXO70	2.03377	4.9164	0.00455409	0.0561544
GGC1:YDL198C	Cntrl	EXO70	2.0055	5.36743	0.00455582	0.0561544
SNR84:snR84	Cntrl	EXO70	-1.92194	8.15075	0.00459087	0.0564715
TRM2:YKR056W	Cntrl	EXO70	-2.20288	2.76803	0.00461399	0.0566407
PUS7:YOR243C	Cntrl	EXO70	-2.09526	3.38163	0.00467607	0.0572866
APT1:YML022W	Cntrl	EXO70	-2.17787	3.04974	0.00469477	0.0573995
YGR027W-A	Cntrl	EXO70	-1.90536	8.74336	0.0048763	0.0593845
SNC2:YOR327C	Cntrl	EXO70	-2.00575	4.2386	0.00487675	0.0593845
YAT2:YER024W	Cntrl	EXO70	1.98371	5.47866	0.00491933	0.0597622
SUL2:YLR092W	Cntrl	EXO70	1.92094	7.40727	0.00492752	0.0597622
OLA1:YBR025C	Cntrl	EXO70	-1.95089	5.13489	0.00502153	0.0607806
RPL31B:YLR406C	Cntrl	EXO70	-2.08845	3.30472	0.00503669	0.0608424
ISF1:YMR081C	Cntrl	EXO70	2.0384	4.53606	0.00505209	0.0609069
RPS23A:YGR118W	Cntrl	EXO70	-1.94823	5.37459	0.00506237	0.0609094
SSA2:YLL024C	Cntrl	EXO70	-1.8943	8.54536	0.00512816	0.0615786
RPL11A:YPR102C	Cntrl	EXO70	-1.93841	5.45481	0.00516119	0.0618525
NOP53:YPL146C	Cntrl	EXO70	-2.42255	2.065	0.00519592	0.0621457
ZUO1:YGR285C	Cntrl	EXO70	-1.94265	5.32833	0.0052187	0.062295
HOM3:YER052C	Cntrl	EXO70	1.92016	6.45525	0.00524177	0.0624473
EFT2:YDR385W	Cntrl	EXO70	-1.88696	8.88637	0.00526919	0.0626505
ASG7:YJL170C	Cntrl	EXO70	2.85492	2.26741	0.00532896	0.063222
HXT7:YDR342C	Cntrl	EXO70	1.88659	8.8642	0.00533814	0.063222
YER138C	Cntrl	EXO70	-1.8748	12.5358	0.00546779	0.0642852
YGR011W	Cntrl	EXO70	7.16554	1.04739	0.00547934	0.0642852
YIL060W	Cntrl	EXO70	7.16554	1.04739	0.00547934	0.0642852
SNR71:snR71	Cntrl	EXO70	-3.3011	0.533749	0.00547934	0.0642852
GSP1:YLR293C	Cntrl	EXO70	-1.93927	5.22911	0.00548222	0.0642852
LEE1:YPL054W	Cntrl	EXO70	2.37175	2.95185	0.00549165	0.0642852
NHP2:YDL208W	Cntrl	EXO70	-2.21802	2.33136	0.00554519	0.0647867
UTP6:YDR449C	Cntrl	EXO70	-2.4122	1.60574	0.00561969	0.0655306
LTV1:YKL143W	Cntrl	EXO70	-2.70258	1.37509	0.0057595	0.0666472
SSF1:YHR066W	Cntrl	EXO70	-2.70258	1.37509	0.0057595	0.0666472
NCS2:YNL119W	Cntrl	EXO70	-2.70258	1.37509	0.0057595	0.0666472
PPM2:YOL141W	Cntrl	EXO70	-2.70258	1.37509	0.0057595	0.0666472
RPL42B:YHR141C	Cntrl	EXO70	-1.91928	4.96659	0.00583318	0.067371
RRN11:YML043C	Cntrl	EXO70	-2.71058	1.19563	0.00585897	0.0674115
NOP15:YNL110C	Cntrl	EXO70	-2.71058	1.19563	0.00585897	0.0674115
BUD23:YCR047C	Cntrl	EXO70	-2.12899	2.70992	0.00599718	0.0687404
SGD1:YLR336C	Cntrl	EXO70	-2.12899	2.70992	0.00599718	0.0687404
IRC23:YOR044W	Cntrl	EXO70	2.8126	2.23336	0.00613111	0.0698229
YGL218W	Cntrl	EXO70	-6.8641	-0.124673	0.00614931	0.0698229
YJL064W	Cntrl	EXO70	-6.8641	-0.124673	0.00614931	0.0698229
YOR345C	Cntrl	EXO70	-4.21331	-0.00996272	0.00614931	0.0698229
tD(GUC)N	Cntrl	EXO70	-4.21331	-0.00996272	0.00614931	0.0698229
SSZ1:YHR064C	Cntrl	EXO70	-1.88899	5.40803	0.00623102	0.0706182
PRR2:YDL214C	Cntrl	EXO70	2.15841	3.59416	0.00637139	0.0720742
VID28:YIL017C	Cntrl	EXO70	1.96156	4.65922	0.00642942	0.0725078
RPL35A:YDL191W	Cntrl	EXO70	-1.92358	4.72443	0.00643369	0.0725078
YOR192C-C	Cntrl	EXO70	-2.29841	2.15279	0.00644749	0.0725283
NDE2:YDL085W	Cntrl	EXO70	2.1874	3.27037	0.00655055	0.0735509
RPL26A:YLR344W	Cntrl	EXO70	-1.92063	4.32975	0.00659568	0.0739205
ASP1:YDR321W	Cntrl	EXO70	-1.95511	4.08249	0.00671681	0.0751389
TRX2:YGR209C	Cntrl	EXO70	-1.86713	5.58073	0.00675	0.0752361
SPG4:YMR107W	Cntrl	EXO70	2.26612	3.19455	0.00675037	0.0752361
YOR192C-B	Cntrl	EXO70	-1.83234	8.07078	0.00676345	0.0752434
NOC3:YLR002C	Cntrl	EXO70	-2.16921	2.29382	0.00694389	0.077109
YJL213W	Cntrl	EXO70	2.05931	3.87482	0.00703178	0.0777995
GTO1:YGR154C	Cntrl	EXO70	2.05931	3.87482	0.00703178	0.0777995
YIL047C-A	Cntrl	EXO70	2.35953	2.74388	0.00707803	0.0781683
ATG7:YHR171W	Cntrl	EXO70	2.14072	3.47401	0.00710814	0.0783579
RIX7:YLL034C	Cntrl	EXO70	-2.08745	2.83531	0.00722688	0.079522
SNR7-L:snR7-L	Cntrl	EXO70	-2.82753	1.07346	0.00728936	0.0799188
BFR2:YDR299W	Cntrl	EXO70	-2.82753	1.07346	0.00728936	0.0799188
TMT1:YER175C	Cntrl	EXO70	1.97659	4.33253	0.00736954	0.0806518
RGI2:YIL057C	Cntrl	EXO70	7.11148	1.00404	0.00744743	0.0810633
AIM32:YML050W	Cntrl	EXO70	7.05531	0.959173	0.00744743	0.0810633
DIA3:YDL024C	Cntrl	EXO70	7.05531	0.959173	0.00744743	0.0810633
YOL103W-A	Cntrl	EXO70	-1.81014	7.79746	0.00746072	0.0810633
MMP1:YLL061W	Cntrl	EXO70	1.83236	6.5988	0.00750817	0.0814327
TMA19:YKL056C	Cntrl	EXO70	-1.82397	6.14394	0.00762484	0.0825501
TMA10:YLR327C	Cntrl	EXO70	1.87604	5.21123	0.00775464	0.0838055
PIC2:YER053C	Cntrl	EXO70	1.88247	5.12998	0.00785619	0.0847516
MUP1:YGR055W	Cntrl	EXO70	1.80061	7.74056	0.00797519	0.0857821
YNL247W	Cntrl	EXO70	-1.88002	4.29801	0.00798006	0.0857821
SYM1:YLR251W	Cntrl	EXO70	2.12564	3.22183	0.00810955	0.0870195
UTP9:YHR196W	Cntrl	EXO70	-2.16251	2.13323	0.00823406	0.0881991
RPC34:YNR003C	Cntrl	EXO70	-2.61544	1.30884	0.00847458	0.0906152
CSR2:YPR030W	Cntrl	EXO70	1.82859	5.56308	0.00856021	0.0913693
PRS1:YKL181W	Cntrl	EXO70	-1.85014	4.49124	0.00858468	0.0914692
OYE3:YPL171C	Cntrl	EXO70	-2.17467	2.43959	0.00866434	0.0921557
SMM1:YNR015W	Cntrl	EXO70	-2.19198	2.2353	0.00873384	0.092732
NOP16:YER002W	Cntrl	EXO70	-2.21536	2.0002	0.00877551	0.0928486
BUD27:YFL023W	Cntrl	EXO70	-2.21536	2.0002	0.00877551	0.0928486
BOP2:YLR267W	Cntrl	EXO70	1.87336	4.86375	0.00892855	0.0943029
YDR545C-A	Cntrl	EXO70	3.52647	1.49807	0.00910829	0.0960337
YMR046C	Cntrl	EXO70	-1.79702	5.32065	0.00917168	0.0965339
YLR256W-A	Cntrl	EXO70	-1.75748	7.91745	0.00922972	0.0969762
TSL1:YML100W	Cntrl	EXO70	1.7541	8.45522	0.00936618	0.0982394
UIP4:YPL186C	Cntrl	EXO70	2.23953	2.84722	0.00941013	0.0985296
USV1:YPL230W	Cntrl	EXO70	1.8884	4.46701	0.00950019	0.0993008
TIF35:YDR429C	Cntrl	EXO70	-1.89366	3.50849	0.00955945	0.0997479
MYO2:YOR326W	Cntrl	MYO2	-8.27809	13.2835	2.3792e-20	1.43847e-16
MET17:YLR303W	Cntrl	MYO2	-4.81502	8.79351	3.88249e-10	1.1167e-06
YDR098C-A	Cntrl	MYO2	-5.38853	4.81791	5.54102e-10	1.1167e-06
PDC6:YGR087C	Cntrl	MYO2	5.70285	4.50418	3.56601e-09	5.39003e-06
YGL152C	Cntrl	MYO2	-9.60943	2.88958	5.25811e-09	5.66511e-06
SNC2:YOR327C	Cntrl	MYO2	-4.48222	6.81729	5.622e-09	5.66511e-06
VTH1:YIL173W	Cntrl	MYO2	9.76305	3.35225	1.36688e-08	1.18059e-05
YLR154W-F	Cntrl	MYO2	-4.19823	10.2509	1.71629e-08	1.29708e-05
RDN5-6	Cntrl	MYO2	-9.35602	2.62385	2.56226e-08	1.72127e-05
SNR9:snR9	Cntrl	MYO2	-3.79205	7.43788	2.68533e-07	0.000162355
SNR34:snR34	Cntrl	MYO2	-3.6748	9.60826	4.34288e-07	0.0002387
RDN5-2	Cntrl	MYO2	-8.82649	2.0739	5.43348e-07	0.000266546
SNR11:snR11	Cntrl	MYO2	-3.61964	11.1741	5.73123e-07	0.000266546
RRP5:YMR229C	Cntrl	MYO2	-3.62728	5.72451	1.1314e-06	0.000488603
SNR35:snR35	Cntrl	MYO2	-3.49419	9.15878	1.27627e-06	0.000513719
YMR013W-A	Cntrl	MYO2	-3.98925	3.56199	1.35949e-06	0.000513719
NOP14:YDL148C	Cntrl	MYO2	-3.87255	3.44963	2.60764e-06	0.000919093
SNR161:snR161	Cntrl	MYO2	-3.49825	5.39007	2.7363e-06	0.000919093
DRS1:YLL008W	Cntrl	MYO2	-3.96613	3.27045	3.34433e-06	0.0010642
SNR48:snR48	Cntrl	MYO2	-3.54211	4.62935	4.0508e-06	0.00119217
ABP1:YCR088W	Cntrl	MYO2	-3.29915	8.27691	4.14085e-06	0.00119217
JLP1:YLL057C	Cntrl	MYO2	3.63126	4.48198	6.34987e-06	0.00174506
SNR49:snR49	Cntrl	MYO2	-3.19833	7.44019	8.10993e-06	0.00213185
SNR33:snR33	Cntrl	MYO2	-3.17815	7.1012	9.17551e-06	0.00231146
SNR67:snR67	Cntrl	MYO2	-3.48898	3.68532	1.00686e-05	0.002435
SNR46:snR46	Cntrl	MYO2	-3.12098	8.15214	1.13599e-05	0.00252683
URA7:YBL039C	Cntrl	MYO2	-3.4128	3.84203	1.15988e-05	0.00252683
SNR5:snR5	Cntrl	MYO2	-3.12902	7.41817	1.17022e-05	0.00252683
NOP7:YGR103W	Cntrl	MYO2	-3.41328	3.9112	1.26121e-05	0.0026294
YLR154C-H	Cntrl	MYO2	8.4867	2.21587	1.34468e-05	0.00270998
SNR56:snR56	Cntrl	MYO2	-3.90498	2.46448	1.5141e-05	0.00295299
YDR149C	Cntrl	MYO2	-4.34743	1.90193	1.59279e-05	0.00300937
SNR32:snR32	Cntrl	MYO2	-3.04527	8.9712	1.66658e-05	0.00301141
MTR4:YJL050W	Cntrl	MYO2	-3.32325	4.07437	1.76766e-05	0.00301141
MRD1:YPR112C	Cntrl	MYO2	-3.53357	3.24632	1.83172e-05	0.00301141
SNR68:snR68	Cntrl	MYO2	-3.13264	5.41618	1.85499e-05	0.00301141
ECM16:YMR128W	Cntrl	MYO2	-3.4451	3.47028	1.9071e-05	0.00301141
NSR1:YGR159C	Cntrl	MYO2	-3.24735	4.48408	1.91876e-05	0.00301141
SNR18:snR18	Cntrl	MYO2	-3.31567	4.12305	1.94252e-05	0.00301141
SNR37:snR37	Cntrl	MYO2	-2.99682	11.8499	2.08532e-05	0.00315196
ALD3:YMR169C	Cntrl	MYO2	3.07175	6.38525	2.29045e-05	0.00337758
BRX1:YOL077C	Cntrl	MYO2	-3.80085	2.36666	2.49918e-05	0.00359763
YLL066W-A	Cntrl	MYO2	-8.05115	1.29991	2.82471e-05	0.00397167
RRP8:YDR083W	Cntrl	MYO2	-4.19585	1.76062	3.23096e-05	0.00443963
SNR41:snR41	Cntrl	MYO2	-2.95968	6.15708	3.5144e-05	0.00452445
DBP2:YNL112W	Cntrl	MYO2	-3.01241	5.13801	3.51902e-05	0.00452445
YPL238C	Cntrl	MYO2	-7.98103	1.23278	3.56805e-05	0.00452445
SNR43:snR43	Cntrl	MYO2	-2.92497	7.41869	3.59202e-05	0.00452445
SNR80:snR80	Cntrl	MYO2	-3.00609	4.8333	4.24269e-05	0.00506837
SNR45:snR45	Cntrl	MYO2	-2.8791	8.30418	4.26514e-05	0.00506837
YLR154W-E	Cntrl	MYO2	-2.86547	12.9705	4.27534e-05	0.00506837
SNR85:snR85	Cntrl	MYO2	-2.90254	6.67008	4.40609e-05	0.00512293
YPL257W-A	Cntrl	MYO2	-2.87576	7.16214	4.75631e-05	0.00522849
YER137C-A	Cntrl	MYO2	-2.87576	7.16214	4.75631e-05	0.00522849
YLR157C-A	Cntrl	MYO2	-2.87576	7.16214	4.75631e-05	0.00522849
SNR76:snR76	Cntrl	MYO2	-3.6886	2.26252	4.85126e-05	0.00523763
RPA190:YOR341W	Cntrl	MYO2	-2.90534	5.94946	5.12479e-05	0.00542273
SNR189:snR189	Cntrl	MYO2	-2.84902	7.86168	5.20209e-05	0.00542273
SNR44:snR44	Cntrl	MYO2	-3.05481	4.30878	5.38565e-05	0.00551892
SAS10:YDL153C	Cntrl	MYO2	-3.31482	3.04356	5.55783e-05	0.00559708
SDA1:YGR245C	Cntrl	MYO2	-3.23751	3.27865	5.73963e-05	0.00559708
RPA135:YPR010C	Cntrl	MYO2	-2.88736	5.61135	5.7963e-05	0.00559708
SNR3:snR3	Cntrl	MYO2	-2.83874	6.85499	5.83222e-05	0.00559708
SRP40:YKR092C	Cntrl	MYO2	-3.42922	2.90334	5.94081e-05	0.00561221
DBP3:YGL078C	Cntrl	MYO2	-3.14827	3.37109	6.21249e-05	0.0057452
EGO4:YNR034W-A	Cntrl	MYO2	3.27184	3.77986	6.27164e-05	0.0057452
RRP12:YPL012W	Cntrl	MYO2	-3.01068	4.04873	6.56467e-05	0.00588144
NOP1:YDL014W	Cntrl	MYO2	-2.94319	4.60061	6.61491e-05	0.00588144
GUA1:YMR217W	Cntrl	MYO2	-2.87126	5.47148	6.98451e-05	0.00612005
RPL6A:YML073C	Cntrl	MYO2	-2.80611	6.26825	7.60414e-05	0.00651365
FPR4:YLR449W	Cntrl	MYO2	-3.10931	3.33581	7.64918e-05	0.00651365
SNR8:snR8	Cntrl	MYO2	-2.76192	8.47495	7.93921e-05	0.00666673
SNR31:snR31	Cntrl	MYO2	-2.76304	7.84094	8.15675e-05	0.00675558
YDR261W-A	Cntrl	MYO2	-3.54771	2.35444	8.711e-05	0.00708004
SNR128:snR128	Cntrl	MYO2	-2.7573	7.40564	8.78271e-05	0.00708004
FMP45:YDL222C	Cntrl	MYO2	2.84795	5.46216	9.73851e-05	0.00765734
RTN2:YDL204W	Cntrl	MYO2	2.8054	5.84764	9.75216e-05	0.00765734
MDN1:YLR106C	Cntrl	MYO2	-2.72495	7.81072	0.000100402	0.00778242
SNR82:snR82	Cntrl	MYO2	-2.70174	9.43059	0.000104501	0.00799766
RPS30B:YOR182C	Cntrl	MYO2	-2.96574	3.43416	0.000125337	0.00946837
HCA4:YJL033W	Cntrl	MYO2	-3.26597	2.75398	0.00012685	0.00946837
SNR13:snR13	Cntrl	MYO2	-2.7477	5.2251	0.000130262	0.00960441
RPL33B:YOR234C	Cntrl	MYO2	-2.83678	4.30527	0.000132153	0.00962644
UTP20:YBL004W	Cntrl	MYO2	-2.69778	5.60142	0.000158826	0.0114317
LIA1:YJR070C	Cntrl	MYO2	-3.11153	2.96797	0.000164134	0.0116748
SPG4:YMR107W	Cntrl	MYO2	3.16418	3.35503	0.000170349	0.0119759
NOP56:YLR197W	Cntrl	MYO2	-2.7325	4.69739	0.000177006	0.0123009
SNR190:snR190	Cntrl	MYO2	-2.58857	11.0997	0.000185943	0.0127751
KRE33:YNL132W	Cntrl	MYO2	-2.90849	3.51732	0.000188859	0.0128297
SNR17B:snR17b	Cntrl	MYO2	-2.56513	11.221	0.000209664	0.0140847
SNR60:snR60	Cntrl	MYO2	-2.7388	4.21908	0.000216278	0.0143694
OPI8:YKR035C	Cntrl	MYO2	7.88	1.69595	0.000243817	0.0152939
YER159C-A	Cntrl	MYO2	7.88	1.69595	0.000243817	0.0152939
RPA43:YOR340C	Cntrl	MYO2	-4.31105	1.32971	0.000243817	0.0152939
SYO1:YDL063C	Cntrl	MYO2	-3.76437	1.37535	0.000243817	0.0152939
RPF2:YKR081C	Cntrl	MYO2	-3.33798	1.94723	0.000247831	0.0152939
DBP7:YKR024C	Cntrl	MYO2	-3.33798	1.94723	0.000247831	0.0152939
UTP14:YML093W	Cntrl	MYO2	-2.88676	3.21677	0.000248171	0.0152939
SPB1:YCL054W	Cntrl	MYO2	-2.87396	3.12605	0.00025043	0.0152939
BMS1:YPL217C	Cntrl	MYO2	-2.67289	4.48223	0.000265612	0.0159159
YGL117W	Cntrl	MYO2	2.6764	5.12898	0.00026588	0.0159159
RGI1:YER067W	Cntrl	MYO2	2.56474	6.33337	0.000284641	0.016872
HAS1:YMR290C	Cntrl	MYO2	-2.99053	2.63523	0.000287576	0.0168804
KAP123:YER110C	Cntrl	MYO2	-2.55389	5.87573	0.000295887	0.0172013
YLR410W-A	Cntrl	MYO2	7.84363	1.66528	0.000305695	0.0176022
SNR17A:snR17a	Cntrl	MYO2	-2.47304	13.3524	0.000333436	0.0190184
SNR36:snR36	Cntrl	MYO2	-2.57858	4.68709	0.000343396	0.0191479
RPL37A:YLR185W	Cntrl	MYO2	-2.59809	4.7504	0.000344159	0.0191479
ARO9:YHR137W	Cntrl	MYO2	2.92426	3.62545	0.000345206	0.0191479
YML039W	Cntrl	MYO2	-2.68065	3.9771	0.000353831	0.0194479
SNR81:snR81	Cntrl	MYO2	-2.62072	4.34803	0.000369742	0.0201393
ENP2:YGR145W	Cntrl	MYO2	-3.21726	2.059	0.000395255	0.0213367
NUG1:YER006W	Cntrl	MYO2	-2.7914	3.20862	0.000405207	0.0215311
YOR309C	Cntrl	MYO2	-3.23518	1.85806	0.000405979	0.0215311
RPS17B:YDR447C	Cntrl	MYO2	-2.69543	3.72164	0.000410266	0.0215693
PWP1:YLR196W	Cntrl	MYO2	-2.80765	3.29452	0.00041894	0.0218355
YPR158C-C	Cntrl	MYO2	-2.45503	6.64186	0.000426637	0.0220466
EBP2:YKL172W	Cntrl	MYO2	-2.69681	3.51225	0.000453701	0.0232464
SNR30:snR30	Cntrl	MYO2	-2.40754	12.6499	0.000462846	0.0235157
YOL163W	Cntrl	MYO2	2.65118	4.26389	0.000476451	0.0240052
UTP5:YDR398W	Cntrl	MYO2	-2.7888	2.87924	0.000505369	0.0252083
CBF5:YLR175W	Cntrl	MYO2	-2.50807	4.74028	0.000513338	0.0252083
MAK21:YDR060W	Cntrl	MYO2	-2.57606	3.96635	0.000515659	0.0252083
PRM7:YDL039C	Cntrl	MYO2	-2.80899	2.98544	0.000520354	0.0252083
MRPL38:YKL170W	Cntrl	MYO2	7.2056	1.13807	0.000530405	0.0252083
FAF1:YIL019W	Cntrl	MYO2	-4.58352	0.742128	0.000530405	0.0252083
RPS24A:YER074W	Cntrl	MYO2	-2.46858	5.23242	0.000530583	0.0252083
PNO1:YOR145C	Cntrl	MYO2	-3.17008	2.01805	0.000533686	0.0252083
LTV1:YKL143W	Cntrl	MYO2	-3.11888	2.16301	0.000572185	0.0268173
RRB1:YMR131C	Cntrl	MYO2	-2.61143	3.59926	0.000591763	0.0275215
YBR116C	Cntrl	MYO2	7.64661	1.50019	0.000621965	0.0287054
RPS6B:YBR181C	Cntrl	MYO2	-2.3699	6.26745	0.000662988	0.0303669
RKI1:YOR095C	Cntrl	MYO2	-3.37957	1.73003	0.000681598	0.0309845
YBR012W-A	Cntrl	MYO2	-2.63267	3.21159	0.000688803	0.0310025
TKL2:YBR117C	Cntrl	MYO2	2.5152	4.6337	0.00069225	0.0310025
RPS16B:YDL083C	Cntrl	MYO2	-2.39345	5.28568	0.000712365	0.0316162
FUN12:YAL035W	Cntrl	MYO2	-2.34686	6.87993	0.00071641	0.0316162
YBL039W-B	Cntrl	MYO2	7.14711	1.09092	0.000726851	0.0318445
TOD6:YBL054W	Cntrl	MYO2	-3.43899	1.47818	0.000747106	0.0322771
SNR10:snR10	Cntrl	MYO2	-2.32501	7.60841	0.000747402	0.0322771
SNR24:snR24	Cntrl	MYO2	-3.0746	2.12471	0.000755559	0.0323474
RPL6B:YLR448W	Cntrl	MYO2	-2.38588	5.08444	0.000759731	0.0323474
NOG1:YPL093W	Cntrl	MYO2	-2.45482	4.20618	0.000797962	0.0336743
YCT1:YLL055W	Cntrl	MYO2	2.33436	6.6623	0.000802035	0.0336743
SNR39:snR39	Cntrl	MYO2	-3.06579	1.71473	0.000814859	0.0339768
BDS1:YOL164W	Cntrl	MYO2	2.32032	6.78966	0.000842124	0.0348732
YLR198C	Cntrl	MYO2	-3.02891	2.08551	0.00087065	0.0358092
RDN58-1	Cntrl	MYO2	-2.2729	11.7932	0.000894316	0.0362888
RDN58-2	Cntrl	MYO2	-2.2729	11.7932	0.000894316	0.0362888
NOP58:YOR310C	Cntrl	MYO2	-2.39627	4.50819	0.000940265	0.037899
ERR1:YOR393W	Cntrl	MYO2	7.0225	0.991218	0.00100641	0.0400313
YOR345C	Cntrl	MYO2	-4.46878	0.64886	0.00100641	0.0400313
YDR365W-A	Cntrl	MYO2	-2.302	5.45373	0.00104889	0.0413894
SNR51:snR51	Cntrl	MYO2	-2.54633	3.20344	0.00105723	0.0413894
SNR63:snR63	Cntrl	MYO2	-2.23792	10.6138	0.00106109	0.0413894
YOL103W-B	Cntrl	MYO2	-2.22942	10.673	0.00110456	0.0428088
BUD22:YMR014W	Cntrl	MYO2	-2.96421	1.84341	0.00117645	0.0453045
AGP3:YFL055W	Cntrl	MYO2	2.28417	5.67073	0.00120137	0.0459715
RLP7:YNL002C	Cntrl	MYO2	-2.66923	2.36077	0.00126708	0.0481811
CHA1:YCL064C	Cntrl	MYO2	2.49318	3.81246	0.00130471	0.0493019
URA2:YJL130C	Cntrl	MYO2	-2.19265	8.76267	0.00134213	0.0504008
SNR70:snR70	Cntrl	MYO2	-2.19387	7.83976	0.00137246	0.0512216
ORT1:YOR130C	Cntrl	MYO2	2.50375	3.62853	0.00139919	0.0518988
SNR79:snR79	Cntrl	MYO2	-2.94069	1.61196	0.00141891	0.0523094
NOP13:YNL175C	Cntrl	MYO2	-2.63697	2.556	0.00147798	0.0539112
RPL14A:YKL006W	Cntrl	MYO2	-2.23469	5.19486	0.00148019	0.0539112
NIT1:YIL164C	Cntrl	MYO2	2.32941	4.67206	0.00150901	0.0544542
RTC3:YHR087W	Cntrl	MYO2	2.21943	6.01369	0.00151312	0.0544542
RPL34B:YIL052C	Cntrl	MYO2	-2.21633	5.53979	0.00155685	0.055348
RPS21B:YJL136C	Cntrl	MYO2	-2.3338	3.90885	0.00156005	0.055348
GGC1:YDL198C	Cntrl	MYO2	2.22574	5.62303	0.00156542	0.055348
TIF3:YPR163C	Cntrl	MYO2	-2.23	5.01748	0.00161689	0.0568355
ARG7:YMR062C	Cntrl	MYO2	2.20256	5.99995	0.00163887	0.0572753
RPS26B:YER131W	Cntrl	MYO2	-2.26184	4.61833	0.00166535	0.057866
SNU13:YEL026W	Cntrl	MYO2	-2.71302	2.13676	0.00171465	0.0592386
DUS3:YLR401C	Cntrl	MYO2	-2.59476	2.41412	0.00173404	0.0595609
YIL028W	Cntrl	MYO2	7.41837	1.31141	0.00174368	0.0595609
SNR72:snR72	Cntrl	MYO2	-3.2175	1.29508	0.00177411	0.0602598
NQM1:YGR043C	Cntrl	MYO2	2.3906	3.89829	0.00180882	0.0610957
RIX1:YHR197W	Cntrl	MYO2	-2.58696	2.29299	0.00184089	0.0618333
ARG4:YHR018C	Cntrl	MYO2	2.1432	7.07313	0.00187009	0.0624671
RPL23B:YER117W	Cntrl	MYO2	-2.20462	4.72731	0.0019021	0.0630646
ERB1:YMR049C	Cntrl	MYO2	-2.42719	3.10382	0.00190884	0.0630646
IRC9:YJL142C	Cntrl	MYO2	3.46206	2.01742	0.00194758	0.0639948
BOL1:YAL044W-A	Cntrl	MYO2	6.81275	0.825888	0.00199604	0.0645352
UTP23:YOR004W	Cntrl	MYO2	-4.20764	0.445543	0.00199604	0.0645352
SNR65:snR65	Cntrl	MYO2	-4.20764	0.445543	0.00199604	0.0645352
YOL162W	Cntrl	MYO2	2.47499	3.3821	0.0020087	0.0645991
YTM1:YOR272W	Cntrl	MYO2	-2.56497	2.49625	0.0020415	0.0653065
RPL13A:YDL082W	Cntrl	MYO2	-2.17534	5.07634	0.00207686	0.0660877
SNR78:snR78	Cntrl	MYO2	-2.87382	1.55816	0.00208845	0.0661088
NOP2:YNL061W	Cntrl	MYO2	-2.2907	3.4282	0.00213241	0.0671486
UTP4:YDR324C	Cntrl	MYO2	-2.4465	2.59194	0.00235169	0.0736701
GCV1:YDR019C	Cntrl	MYO2	2.15409	5.13903	0.00242224	0.0754889
YEF3:YLR249W	Cntrl	MYO2	-2.05695	9.39149	0.00247882	0.0762649
DID2:YKR035W-A	Cntrl	MYO2	-2.77586	1.87436	0.00248498	0.0762649
KRR1:YCL059C	Cntrl	MYO2	-2.60929	1.90451	0.00248498	0.0762649
VPS73:YGL104C	Cntrl	MYO2	2.35223	3.78524	0.00253884	0.0773928
YGL088W	Cntrl	MYO2	-3.05879	1.46169	0.00254733	0.0773928
RPL33A:YPL143W	Cntrl	MYO2	-2.13138	4.84161	0.00261114	0.0789346
PUF6:YDR496C	Cntrl	MYO2	-2.44397	2.76046	0.00270679	0.0811176
YVH1:YIR026C	Cntrl	MYO2	-2.6234	2.19869	0.00271018	0.0811176
FMP16:YDR070C	Cntrl	MYO2	2.2752	3.95618	0.00273655	0.0815032
KRI1:YNL308C	Cntrl	MYO2	-2.21777	3.50404	0.00277159	0.0821422
SNR52:snR52	Cntrl	MYO2	-2.28268	3.10725	0.00283387	0.0824528
SNR14:snR14	Cntrl	MYO2	-2.19864	3.76259	0.00284405	0.0824528
DHR2:YKL078W	Cntrl	MYO2	-6.98673	0.355131	0.00286389	0.0824528
YOR396C-A	Cntrl	MYO2	6.73546	0.76582	0.00286389	0.0824528
YLR467C-A	Cntrl	MYO2	6.73546	0.76582	0.00286389	0.0824528
YLR466C-A	Cntrl	MYO2	6.73546	0.76582	0.00286389	0.0824528
RPL39:YJL189W	Cntrl	MYO2	-2.33503	2.75036	0.00296923	0.0850804
SSB1:YDL229W	Cntrl	MYO2	-2.02221	7.81121	0.00300595	0.0857262
RPL43A:YPR043W	Cntrl	MYO2	-2.06066	5.52542	0.00303157	0.086051
STR3:YGL184C	Cntrl	MYO2	2.02496	7.43443	0.00308638	0.0868789
TIF4631:YGR162W	Cntrl	MYO2	-2.05319	5.72942	0.00308947	0.0868789
HYP2:YEL034W	Cntrl	MYO2	-2.06157	5.37066	0.00312075	0.0871245
SNR69:snR69	Cntrl	MYO2	-2.17223	3.59097	0.00312703	0.0871245
NOP10:YHR072W-A	Cntrl	MYO2	-2.46659	2.51516	0.0032194	0.0892867
PEX14:YGL153W	Cntrl	MYO2	-2.10972	4.34234	0.00327461	0.0904032
RPL34A:YER056C-A	Cntrl	MYO2	-2.08763	4.36953	0.00349466	0.0960396
HIS4:YCL030C	Cntrl	MYO2	1.99119	7.50341	0.00354356	0.0964063
SNR50:snR50	Cntrl	MYO2	-2.23123	3.06578	0.00355584	0.0964063
NOG2:YNR053C	Cntrl	MYO2	-2.23123	3.06578	0.00355584	0.0964063
YLR154C-G	Cntrl	MYO4	-16.8915	10.2471	2.95409e-30	1.78191e-26
SNC1:YAL030W	Cntrl	MYO4	-9.84478	10.9695	1.82741e-24	5.51147e-21
MYO4:YAL029C	Cntrl	MYO4	-9.29997	13.3924	2.26473e-23	4.55362e-20
MET17:YLR303W	Cntrl	MYO4	-5.06476	8.90796	8.06613e-11	1.21637e-07
RDN5-6	Cntrl	MYO4	-10.0054	3.20809	6.93525e-10	7.43342e-07
YLR154W-F	Cntrl	MYO4	-4.69137	10.5955	7.39399e-10	7.43342e-07
RDN5-2	Cntrl	MYO4	-9.96477	3.16436	8.83477e-10	7.61304e-07
VTH1:YIL173W	Cntrl	MYO4	9.6861	3.26462	2.7512e-08	2.07441e-05
YMR051C	Cntrl	MYO4	-6.64627	2.53048	3.22964e-08	2.16457e-05
YMR013W-A	Cntrl	MYO4	-4.50854	3.91183	6.48884e-08	3.91407e-05
YNL276C	Cntrl	MYO4	9.3959	3.00531	1.464e-07	8.02802e-05
SNR161:snR161	Cntrl	MYO4	-3.88396	5.61494	2.64984e-07	0.000133072
SNR33:snR33	Cntrl	MYO4	-3.77511	7.52104	2.86794e-07	0.000133072
SNR128:snR128	Cntrl	MYO4	-3.70655	8.13571	3.9052e-07	0.000158804
SNR9:snR9	Cntrl	MYO4	-3.724	7.2441	3.94905e-07	0.000158804
PDC6:YGR087C	Cntrl	MYO4	4.24614	4.43891	6.58007e-07	0.000248069
YGL152C	Cntrl	MYO4	-8.8372	1.95335	7.45e-07	0.000264343
SNR41:snR41	Cntrl	MYO4	-3.61372	6.62131	8.71485e-07	0.000292044
YDR098C-A	Cntrl	MYO4	-4.18138	3.45463	9.36422e-07	0.000293809
OXA1:YER154W	Cntrl	MYO4	-3.61237	6.15268	1.01813e-06	0.000293809
SNR18:snR18	Cntrl	MYO4	-3.83375	4.46142	1.05197e-06	0.000293809
SNR34:snR34	Cntrl	MYO4	-3.52332	9.34076	1.07158e-06	0.000293809
SNR76:snR76	Cntrl	MYO4	-4.48833	2.85047	1.2667e-06	0.000332207
SNR49:snR49	Cntrl	MYO4	-3.44998	7.5402	1.88947e-06	0.000474887
SNR44:snR44	Cntrl	MYO4	-3.60048	4.66676	2.24089e-06	0.000540683
SNR68:snR68	Cntrl	MYO4	-3.44687	5.56685	2.99732e-06	0.000695377
SNR190:snR190	Cntrl	MYO4	-3.31914	11.6195	3.35702e-06	0.000721547
SNR51:snR51	Cntrl	MYO4	-3.6326	4.02879	3.42707e-06	0.000721547
SNR48:snR48	Cntrl	MYO4	-3.59296	4.53024	3.46898e-06	0.000721547
YGR115C	Cntrl	MYO4	-4.62014	2.38142	3.94671e-06	0.00078459
JLP1:YLL057C	Cntrl	MYO4	3.78697	4.36716	4.21817e-06	0.00078459
SNR45:snR45	Cntrl	MYO4	-3.29012	8.54423	4.26605e-06	0.00078459
YML039W	Cntrl	MYO4	-3.48645	4.55912	4.34883e-06	0.00078459
SNR35:snR35	Cntrl	MYO4	-3.28168	8.83684	4.42242e-06	0.00078459
SNR56:snR56	Cntrl	MYO4	-4.25733	2.61968	4.77437e-06	0.000822829
SNR13:snR13	Cntrl	MYO4	-3.34733	5.62736	4.98833e-06	0.000835823
YPL060C-A	Cntrl	MYO4	8.70717	2.40025	6.00382e-06	0.000978785
SNR80:snR80	Cntrl	MYO4	-3.31333	4.97113	8.85328e-06	0.00140462
SNR8:snR8	Cntrl	MYO4	-3.15797	8.69834	9.08158e-06	0.00140462
RRP5:YMR229C	Cntrl	MYO4	-3.25375	5.23996	1.02484e-05	0.00154546
SNR11:snR11	Cntrl	MYO4	-3.11952	10.5912	1.05628e-05	0.00155402
SNR32:snR32	Cntrl	MYO4	-3.10983	8.90129	1.16986e-05	0.00168014
SNR60:snR60	Cntrl	MYO4	-3.3088	4.58641	1.30931e-05	0.00183466
RPS30A:YLR287C-A	Cntrl	MYO4	-3.18759	5.56867	1.33828e-05	0.00183466
SNR43:snR43	Cntrl	MYO4	-3.07199	7.42016	1.57671e-05	0.00211349
SNR189:snR189	Cntrl	MYO4	-3.00695	7.87279	2.18576e-05	0.0028662
SNR36:snR36	Cntrl	MYO4	-3.09475	5.00232	2.80558e-05	0.0036007
ALD3:YMR169C	Cntrl	MYO4	3.02213	6.27023	3.12991e-05	0.00393326
SNR14:snR14	Cntrl	MYO4	-3.13555	4.42661	3.41277e-05	0.0042012
YNL143C	Cntrl	MYO4	-3.24519	3.78878	3.48896e-05	0.00420908
SNR39B:snR39B	Cntrl	MYO4	-3.03981	4.66345	4.33532e-05	0.00512758
RDN58-1	Cntrl	MYO4	-2.85285	12.1622	4.58371e-05	0.00521678
RDN58-2	Cntrl	MYO4	-2.85285	12.1622	4.58371e-05	0.00521678
SNR3:snR3	Cntrl	MYO4	-2.88682	6.76645	4.76121e-05	0.00531845
YBR012W-A	Cntrl	MYO4	-3.21116	3.56545	4.91653e-05	0.00539209
YAL045C	Cntrl	MYO4	-8.00957	1.11025	5.79138e-05	0.00623815
SNR82:snR82	Cntrl	MYO4	-2.80792	9.39577	5.94375e-05	0.00628995
NOP7:YGR103W	Cntrl	MYO4	-3.13723	3.49734	7.52939e-05	0.00783056
SNR67:snR67	Cntrl	MYO4	-3.1307	3.19009	8.30948e-05	0.00849539
SNR5:snR5	Cntrl	MYO4	-2.75779	6.95855	8.99272e-05	0.00904068
SNR62:snR62	Cntrl	MYO4	-5.12682	1.00738	9.63608e-05	0.00952867
SNR37:snR37	Cntrl	MYO4	-2.70351	11.4655	0.000101986	0.00992225
SNR52:snR52	Cntrl	MYO4	-3.04605	3.60577	0.000104269	0.00998332
NOP1:YDL014W	Cntrl	MYO4	-2.84421	4.36636	0.000115892	0.0109228
SNR85:snR85	Cntrl	MYO4	-2.70726	6.36664	0.00012455	0.0114817
YLR157C-B	Cntrl	MYO4	-2.90551	3.80085	0.000125629	0.0114817
ECM16:YMR128W	Cntrl	MYO4	-3.09978	2.98523	0.000138326	0.0124534
YHR054C	Cntrl	MYO4	-7.84035	0.948056	0.000164799	0.0146186
FMP45:YDL222C	Cntrl	MYO4	2.74234	5.35863	0.00016805	0.014691
MTR4:YJL050W	Cntrl	MYO4	-2.87893	3.51391	0.000177692	0.015312
SNR81:snR81	Cntrl	MYO4	-2.75827	4.32143	0.000192753	0.0162002
DID2:YKR035W-A	Cntrl	MYO4	-3.33023	2.1644	0.000193372	0.0162002
SNR46:snR46	Cntrl	MYO4	-2.58322	7.55032	0.000208805	0.0172535
SDA1:YGR245C	Cntrl	MYO4	-3.01743	2.91086	0.000213296	0.0172991
YLL066W-A	Cntrl	MYO4	-7.74766	0.861051	0.00021796	0.0172991
YPL238C	Cntrl	MYO4	-7.74766	0.861051	0.00021796	0.0172991
SNR24:snR24	Cntrl	MYO4	-3.28452	2.12338	0.000222231	0.017409
SNR17A:snR17a	Cntrl	MYO4	-2.5391	13.2819	0.000238566	0.0184491
RDN5-1	Cntrl	MYO4	-2.5413	8.87098	0.000245661	0.0184507
RRT15:YLR162W-A	Cntrl	MYO4	-2.64252	5.13267	0.000246775	0.0184507
TLC1	Cntrl	MYO4	-2.54987	7.53067	0.000247763	0.0184507
SNR30:snR30	Cntrl	MYO4	-2.52427	12.622	0.000257481	0.0189406
YLR154W-E	Cntrl	MYO4	-2.51656	12.5418	0.000267798	0.0194621
FPR4:YLR449W	Cntrl	MYO4	-2.87726	2.96206	0.000299252	0.0214413
RPA43:YOR340C	Cntrl	MYO4	-4.41043	1.21389	0.000305695	0.0214413
ATP8:Q0080	Cntrl	MYO4	-3.86571	1.26241	0.000305695	0.0214413
RPS30B:YOR182C	Cntrl	MYO4	-2.83888	3.15863	0.000310413	0.021522
SNR64:snR64	Cntrl	MYO4	-2.88082	3.04604	0.000317781	0.0217825
SNR10:snR10	Cntrl	MYO4	-2.49111	7.61944	0.00033352	0.0222207
YLR154C-H	Cntrl	MYO4	4.47807	2.17748	0.000343491	0.0222207
YDR545C-A	Cntrl	MYO4	-2.69042	3.91418	0.0003451	0.0222207
LIA1:YJR070C	Cntrl	MYO4	-2.9951	2.69156	0.000345287	0.0222207
SNR70:snR70	Cntrl	MYO4	-2.47823	7.94881	0.000345495	0.0222207
SNR19:snR19	Cntrl	MYO4	-2.46965	9.06451	0.000346277	0.0222207
YOL162W	Cntrl	MYO4	3.08549	3.22771	0.000373606	0.0235745
OPI8:YKR035C	Cntrl	MYO4	7.80329	1.62973	0.000385253	0.0235745
SNR77:snR77	Cntrl	MYO4	-2.90238	2.89889	0.000387624	0.0235745
URA7:YBL039C	Cntrl	MYO4	-2.78919	3.11488	0.000390157	0.0235745
YBR089W	Cntrl	MYO4	-7.6486	0.769588	0.000390825	0.0235745
YPR099C	Cntrl	MYO4	-7.54224	0.673194	0.000390825	0.0235745
GUA1:YMR217W	Cntrl	MYO4	-2.52486	5.03102	0.000442477	0.0262636
MRD1:YPR112C	Cntrl	MYO4	-2.92688	2.52126	0.000444113	0.0262636
RPS6A:YPL090C	Cntrl	MYO4	-2.44877	5.97334	0.000466245	0.0273048
RPA135:YPR010C	Cntrl	MYO4	-2.4985	5.13503	0.000477752	0.0277096
YLL067C	Cntrl	MYO4	7.72963	1.5683	0.000488131	0.028042
SNR4:snR4	Cntrl	MYO4	-2.3904	9.18919	0.000512718	0.0291766
SNR50:snR50	Cntrl	MYO4	-2.70653	3.30316	0.000564032	0.0317966
SNR40:snR40	Cntrl	MYO4	-2.45616	4.88719	0.000571497	0.0319192
KRE33:YNL132W	Cntrl	MYO4	-2.65901	3.13747	0.000587533	0.0325138
DBP2:YNL112W	Cntrl	MYO4	-2.49337	4.54053	0.000611865	0.0335524
SNR53:snR53	Cntrl	MYO4	-4.24121	1.06384	0.000621965	0.0337382
EGO4:YNR034W-A	Cntrl	MYO4	2.72822	3.72781	0.000626438	0.0337382
RTN2:YDL204W	Cntrl	MYO4	2.42037	5.77995	0.000654469	0.0349359
SNR17B:snR17b	Cntrl	MYO4	-2.33504	10.8996	0.000663772	0.0351217
KAP123:YER110C	Cntrl	MYO4	-2.3928	5.60405	0.000690296	0.0362075
RPA190:YOR341W	Cntrl	MYO4	-2.38107	5.35982	0.000777298	0.0404195
TKL2:YBR117C	Cntrl	MYO4	2.48872	4.52687	0.000786439	0.0404493
GIP4:YAL031C	Cntrl	MYO4	-2.34599	5.91924	0.000791282	0.0404493
SPB1:YCL054W	Cntrl	MYO4	-2.66898	2.78098	0.000798427	0.0404716
SNR7-S:snR7-S	Cntrl	MYO4	-2.37179	5.0275	0.000885607	0.0445165
SNR31:snR31	Cntrl	MYO4	-2.2794	7.29957	0.000936711	0.0466962
NOP56:YLR197W	Cntrl	MYO4	-2.41738	4.28155	0.000945226	0.0467344
CBF5:YLR175W	Cntrl	MYO4	-2.38796	4.49582	0.000969971	0.047568
AGP3:YFL055W	Cntrl	MYO4	2.34824	5.54291	0.000990744	0.0481798
NOP58:YOR310C	Cntrl	MYO4	-2.37917	4.3497	0.000998662	0.0481798
SNR65:snR65	Cntrl	MYO4	-4.58911	0.545797	0.00100641	0.0481798
RPS26B:YER131W	Cntrl	MYO4	-2.33576	4.53759	0.00111275	0.0528513
TIF3:YPR163C	Cntrl	MYO4	-2.30282	4.93906	0.00114707	0.0540556
SNR78:snR78	Cntrl	MYO4	-3.1287	1.57719	0.00117558	0.0541306
SNR39:snR39	Cntrl	MYO4	-3.1287	1.57719	0.00117558	0.0541306
BRX1:YOL077C	Cntrl	MYO4	-3.1287	1.57719	0.00117558	0.0541306
NOP14:YDL148C	Cntrl	MYO4	-2.80018	2.29399	0.00126708	0.0579019
SNR66:snR66	Cntrl	MYO4	-2.65122	2.68107	0.00128742	0.0583242
RPS17B:YDR447C	Cntrl	MYO4	-2.46756	3.37018	0.00130183	0.0583242
RPS26A:YGL189C	Cntrl	MYO4	-2.20958	6.87349	0.00133269	0.0583242
YNL054W-A	Cntrl	MYO4	7.52713	1.40064	0.00133434	0.0583242
SNR87:snR87	Cntrl	MYO4	-4.04946	0.900151	0.00133434	0.0583242
YDR149C	Cntrl	MYO4	-3.50474	0.960415	0.00133434	0.0583242
SSA2:YLL024C	Cntrl	MYO4	-2.18693	8.96779	0.00136847	0.0593855
YIL163C	Cntrl	MYO4	4.13344	1.89032	0.00141891	0.0607868
SNR55:snR55	Cntrl	MYO4	-2.37097	3.82442	0.00142091	0.0607868
YML116W-A	Cntrl	MYO4	3.15554	2.40456	0.00149543	0.0630798
HCA4:YJL033W	Cntrl	MYO4	-2.73778	2.11467	0.00149543	0.0630798
SSB1:YDL229W	Cntrl	MYO4	-2.14809	7.78467	0.00170119	0.0709507
SNR63:snR63	Cntrl	MYO4	-2.13703	10.4041	0.00170555	0.0709507
SNR79:snR79	Cntrl	MYO4	-3.05855	1.51905	0.00171843	0.0709968
MRPL51:YPR100W	Cntrl	MYO4	7.43743	1.327	0.00174368	0.0715502
YOL103W-A	Cntrl	MYO4	2.18142	6.13193	0.0017977	0.0732684
FUN12:YAL035W	Cntrl	MYO4	-2.15033	6.58686	0.00182325	0.0735379
SNR38:snR38	Cntrl	MYO4	-2.71018	2.21823	0.00184089	0.0735379
SAS10:YDL153C	Cntrl	MYO4	-2.59634	2.24074	0.00184089	0.0735379
RPL43A:YPR043W	Cntrl	MYO4	-2.1707	5.47986	0.00185435	0.0735883
SCR1	Cntrl	MYO4	-2.11197	12.2709	0.001905	0.0751043
SNR69:snR69	Cntrl	MYO4	-2.31403	3.55383	0.00196532	0.0769794
SNR54:snR54	Cntrl	MYO4	-7.16605	0.348341	0.00199604	0.0776783
NQM1:YGR043C	Cntrl	MYO4	2.4126	3.79174	0.00203442	0.0786644
MDN1:YLR106C	Cntrl	MYO4	-2.10868	7.16232	0.00209113	0.0803419
YEF3:YLR249W	Cntrl	MYO4	-2.0825	9.28487	0.00220916	0.08354
SNR72:snR72	Cntrl	MYO4	-3.30199	1.16919	0.00222798	0.08354
ROK1:YGL171W	Cntrl	MYO4	-3.30199	1.16919	0.00222798	0.08354
SNR86:snR86	Cntrl	MYO4	-2.07805	11.2276	0.00222976	0.08354
YIL029C	Cntrl	MYO4	7.34179	1.24893	0.00229484	0.0844054
YLL067W-A	Cntrl	MYO4	7.34179	1.24893	0.00229484	0.0844054
YIL028W	Cntrl	MYO4	7.34179	1.24893	0.00229484	0.0844054
TRM11:YOL124C	Cntrl	MYO4	-2.79109	1.70282	0.00231637	0.0846808
NOP2:YNL061W	Cntrl	MYO4	-2.28096	3.26399	0.0023467	0.0849426
DBP3:YGL078C	Cntrl	MYO4	-2.42546	2.57775	0.00235169	0.0849426
RPS9B:YBR189W	Cntrl	MYO4	-2.10835	5.429	0.0024379	0.0874096
RPL6B:YLR448W	Cntrl	MYO4	-2.15292	4.75211	0.00244898	0.0874096
PWP1:YLR196W	Cntrl	MYO4	-2.38314	2.77055	0.00246943	0.0876213
RPS24A:YER074W	Cntrl	MYO4	-2.13842	4.81892	0.00254016	0.0896039
RME2	Cntrl	MYO4	2.30824	3.88704	0.00270765	0.0949567
NOP15:YNL110C	Cntrl	MYO4	-2.91231	1.6138	0.00276276	0.0957758
LTV1:YKL143W	Cntrl	MYO4	-2.72419	1.64929	0.00276276	0.0957758
UTP20:YBL004W	Cntrl	MYO4	-2.09427	4.95605	0.00283751	0.0978049
ERR2:YPL281C	Cntrl	MYO4	-7.01516	0.225488	0.00286389	0.0981533
PRM7:YDL039C	Cntrl	MYO4	-2.46868	2.52895	0.00289655	0.098712
SEO1:YAL067C	Cntrl	OM45	12.6683	6.10806	1.05592e-16	6.35771e-13
OM45:YIL136W	Cntrl	OM45	-6.92353	12.0128	2.58343e-16	7.77743e-13
MF(ALPHA)1:YPL187W	Cntrl	OM45	-8.9775	5.09096	6.00915e-15	1.20604e-11
STE2:YFL026W	Cntrl	OM45	6.66297	5.86887	9.05925e-13	1.17269e-09
STE3:YKL178C	Cntrl	OM45	-6.64838	5.17112	9.73835e-13	1.17269e-09
SAG1:YJR004C	Cntrl	OM45	-4.67073	6.70653	1.77413e-09	1.78034e-06
PDC6:YGR087C	Cntrl	OM45	5.60859	4.4804	4.67522e-09	4.02136e-06
RDN5-6	Cntrl	OM45	-9.50286	2.75184	1.18591e-08	8.92544e-06
MET17:YLR303W	Cntrl	OM45	-4.15785	8.12878	2.66484e-08	1.51097e-05
MFA2:YNL145W	Cntrl	OM45	9.66345	3.26977	2.7512e-08	1.51097e-05
BAR1:YIL015W	Cntrl	OM45	4.74369	5.00275	2.76045e-08	1.51097e-05
YBL111C	Cntrl	OM45	9.64287	3.25117	3.01324e-08	1.51189e-05
YHR218W	Cntrl	OM45	-9.30675	2.54431	4.09326e-08	1.89581e-05
YMR013W-A	Cntrl	OM45	-4.55831	4.07446	6.27922e-08	2.70051e-05
COS2:YBR302C	Cntrl	OM45	9.3188	2.96014	1.81762e-07	7.28382e-05
YMR051C	Cntrl	OM45	-6.25406	2.25363	1.93558e-07	7.28382e-05
SNR48:snR48	Cntrl	OM45	-3.96607	4.9912	3.30004e-07	0.00011688
SNR9:snR9	Cntrl	OM45	-3.69252	7.31001	4.70722e-07	0.000149505
STE6:YKL209C	Cntrl	OM45	3.85271	5.92005	4.71782e-07	0.000149505
BDS1:YOL164W	Cntrl	OM45	3.70844	6.60657	6.51297e-07	0.000196073
AFB1:YLR040C	Cntrl	OM45	-4.07751	4.02828	6.93761e-07	0.000198911
AGA2:YGL032C	Cntrl	OM45	5.75422	3.21142	7.93931e-07	0.000217285
SNR77:snR77	Cntrl	OM45	-3.85113	3.89919	1.59785e-06	0.000418288
MFA1:YDR461W	Cntrl	OM45	8.86507	2.55826	2.14312e-06	0.000537397
SNR56:snR56	Cntrl	OM45	-4.30115	2.79238	2.28694e-06	0.000537397
YGL152C	Cntrl	OM45	-8.58126	1.78837	2.45054e-06	0.000537397
SNR60:snR60	Cntrl	OM45	-3.56895	4.93387	2.46087e-06	0.000537397
SNR41:snR41	Cntrl	OM45	-3.43177	6.54925	2.49911e-06	0.000537397
SNR24:snR24	Cntrl	OM45	-4.0262	2.94836	3.05776e-06	0.000634855
MF(ALPHA)2:YGL089C	Cntrl	OM45	-3.81224	3.77165	3.17896e-06	0.000638017
SNR80:snR80	Cntrl	OM45	-3.45385	5.20386	3.84109e-06	0.00074604
SNR161:snR161	Cntrl	OM45	-3.43732	5.29531	4.20718e-06	0.000791608
SNR34:snR34	Cntrl	OM45	-3.27897	9.21085	4.46967e-06	0.000815512
SNR67:snR67	Cntrl	OM45	-3.65853	3.79987	5.16543e-06	0.000914736
JLP1:YLL057C	Cntrl	OM45	3.66047	4.45407	5.81403e-06	0.00100018
SNR128:snR128	Cntrl	OM45	-3.23813	7.79923	6.05901e-06	0.00101337
SNR18:snR18	Cntrl	OM45	-3.48934	4.24202	6.9822e-06	0.00113621
SNR68:snR68	Cntrl	OM45	-3.28525	5.51761	7.61625e-06	0.00117883
SNR5:snR5	Cntrl	OM45	-3.20158	7.44892	7.63565e-06	0.00117883
SNR52:snR52	Cntrl	OM45	-3.48693	4.12565	8.93981e-06	0.0013305
SNR3:snR3	Cntrl	OM45	-3.17946	7.12401	9.11366e-06	0.0013305
SNR11:snR11	Cntrl	OM45	-3.14236	10.7049	9.281e-06	0.0013305
SNR51:snR51	Cntrl	OM45	-3.4453	3.96287	9.87648e-06	0.00137222
SNR44:snR44	Cntrl	OM45	-3.36103	4.54797	1.00278e-05	0.00137222
YLR154W-F	Cntrl	OM45	-3.10601	9.20592	1.18706e-05	0.00158828
SNR10:snR10	Cntrl	OM45	-3.06384	8.21421	1.57231e-05	0.00204829
SNR13:snR13	Cntrl	OM45	-3.13556	5.5333	1.5989e-05	0.00204829
SNR35:snR35	Cntrl	OM45	-3.03473	8.70822	1.78927e-05	0.00224442
SNR85:snR85	Cntrl	OM45	-2.99011	6.71254	2.67478e-05	0.0032867
SNR36:snR36	Cntrl	OM45	-3.07883	5.09005	2.76827e-05	0.00330456
SUL1:YBR294W	Cntrl	OM45	2.96502	8.39741	2.79908e-05	0.00330456
SNR49:snR49	Cntrl	OM45	-2.96545	7.19648	2.90681e-05	0.00336575
YOL163W	Cntrl	OM45	3.33986	4.17308	3.28506e-05	0.00373195
NOP14:YDL148C	Cntrl	OM45	-3.45152	3.00192	3.48151e-05	0.00388188
SNR37:snR37	Cntrl	OM45	-2.89853	11.7292	3.58052e-05	0.00391969
VHS2:YIL135C	Cntrl	OM45	-2.95445	5.61878	4.06229e-05	0.00436769
DRS1:YLL008W	Cntrl	OM45	-3.52513	2.80084	4.75578e-05	0.00502361
MRD1:YPR112C	Cntrl	OM45	-3.38647	3.06011	5.11316e-05	0.00530799
SNR189:snR189	Cntrl	OM45	-2.81842	7.80037	6.06981e-05	0.0061943
YGL088W	Cntrl	OM45	-3.91677	2.15698	6.40524e-05	0.00642766
YCT1:YLL055W	Cntrl	OM45	2.85165	6.55942	6.55554e-05	0.00647064
SNR43:snR43	Cntrl	OM45	-2.80202	7.27558	6.85676e-05	0.00660716
PHO12:YHR215W	Cntrl	OM45	8.17099	1.95683	6.91332e-05	0.00660716
NOP7:YGR103W	Cntrl	OM45	-3.13727	3.61197	7.04566e-05	0.00662842
SNR33:snR33	Cntrl	OM45	-2.80462	6.73311	7.20322e-05	0.0066724
SNR32:snR32	Cntrl	OM45	-2.76153	8.68665	7.82611e-05	0.00713955
SNR87:snR87	Cntrl	OM45	-4.6053	1.53621	8.43945e-05	0.00734803
SNR75:snR75	Cntrl	OM45	-3.61887	2.14235	8.52291e-05	0.00734803
SNR78:snR78	Cntrl	OM45	-3.61887	2.14235	8.52291e-05	0.00734803
SNR39B:snR39B	Cntrl	OM45	-2.90441	4.64603	8.58677e-05	0.00734803
SNR64:snR64	Cntrl	OM45	-3.14724	3.40336	8.66484e-05	0.00734803
SNR45:snR45	Cntrl	OM45	-2.74453	8.152	8.79324e-05	0.00735335
SNR61:snR61	Cntrl	OM45	-3.11928	3.21288	8.96219e-05	0.00739197
SNR47:snR47	Cntrl	OM45	-2.99632	3.73218	9.12797e-05	0.00742696
SNR190:snR190	Cntrl	OM45	-2.7211	11.1804	9.305e-05	0.00747005
ASG7:YJL170C	Cntrl	OM45	4.80921	2.38575	9.86135e-05	0.00771106
SNR79:snR79	Cntrl	OM45	-3.57458	2.10194	9.86135e-05	0.00771106
SNR65:snR65	Cntrl	OM45	-4.97268	1.01346	0.000125561	0.00969235
RPA43:YOR340C	Cntrl	OM45	-4.54138	1.47695	0.000127312	0.0097031
YDR545C-A	Cntrl	OM45	-2.85067	4.16396	0.000132313	0.00995824
SNR55:snR55	Cntrl	OM45	-2.81052	4.311	0.000137145	0.0101944
MTR4:YJL050W	Cntrl	OM45	-2.91486	3.65919	0.00014226	0.0104457
SNR46:snR46	Cntrl	OM45	-2.65313	7.70506	0.00014649	0.0106267
SNR31:snR31	Cntrl	OM45	-2.64283	7.70213	0.000153303	0.0109523
ECM16:YMR128W	Cntrl	OM45	-3.09049	3.097	0.000154617	0.0109523
SNR72:snR72	Cntrl	OM45	-3.78416	1.72059	0.000191901	0.0134353
SNR40:snR40	Cntrl	OM45	-2.67907	5.18041	0.000204548	0.0141562
SNR50:snR50	Cntrl	OM45	-2.88472	3.57423	0.000213161	0.0145846
SNR38:snR38	Cntrl	OM45	-3.08593	2.66838	0.000232936	0.0157585
SDA1:YGR245C	Cntrl	OM45	-2.99109	3.00788	0.000252713	0.0169065
SNR62:snR62	Cntrl	OM45	-4.78101	0.846901	0.000290613	0.0192284
YDR209C	Cntrl	OM45	7.85031	1.68505	0.000305695	0.0196432
SNR71:snR71	Cntrl	OM45	-3.78473	1.33298	0.000305695	0.0196432
NIT1:YIL164C	Cntrl	OM45	2.72698	4.5926	0.000309056	0.0196432
RPL32:YBL092W	Cntrl	OM45	-2.52629	6.43955	0.000309933	0.0196432
SNR82:snR82	Cntrl	OM45	-2.48312	9.20908	0.000323099	0.0200872
SNR69:snR69	Cntrl	OM45	-2.71012	4.00074	0.00032361	0.0200872
SNR39:snR39	Cntrl	OM45	-3.3301	1.88385	0.000343491	0.0211037
ARG3:YJL088W	Cntrl	OM45	2.51513	6.2884	0.000378443	0.0229664
YGL117W	Cntrl	OM45	2.58062	5.11202	0.000383714	0.0229664
YLL067C	Cntrl	OM45	7.77664	1.62323	0.000385253	0.0229664
YLR154W-E	Cntrl	OM45	-2.43821	12.5684	0.000397377	0.0234569
SNR81:snR81	Cntrl	OM45	-2.59675	4.28653	0.000436055	0.0254901
GGC1:YDL198C	Cntrl	OM45	2.50789	5.54995	0.000468887	0.0269244
HCA4:YJL033W	Cntrl	OM45	-2.92771	2.40239	0.000469533	0.0269244
GCV1:YDR019C	Cntrl	OM45	2.55483	5.05011	0.000477594	0.0271089
KRE33:YNL132W	Cntrl	OM45	-2.687	3.27749	0.000481756	0.0271089
SNR66:snR66	Cntrl	OM45	-2.7698	2.90305	0.000505369	0.0281743
RPA135:YPR010C	Cntrl	OM45	-2.46572	5.20747	0.000515787	0.0284913
DHR2:YKL078W	Cntrl	OM45	-7.42835	0.684687	0.000530405	0.0290324
RRP5:YMR229C	Cntrl	OM45	-2.49859	4.67095	0.000567102	0.0307414
SNR76:snR76	Cntrl	OM45	-3.21939	1.78809	0.000571838	0.0307414
RDN5-1	Cntrl	OM45	-2.36819	8.81812	0.000578941	0.0308478
RPA190:YOR341W	Cntrl	OM45	-2.4215	5.4931	0.000603533	0.0318761
HIS4:YCL030C	Cntrl	OM45	2.3702	7.40349	0.000628295	0.0328953
FPR4:YLR449W	Cntrl	OM45	-2.71612	2.94093	0.000671796	0.0348697
SNR42:snR42	Cntrl	OM45	-2.31961	8.67583	0.000739251	0.038043
ARG7:YMR062C	Cntrl	OM45	2.38294	5.93991	0.000755379	0.0385436
YHL009W-B	Cntrl	OM45	7.5741	1.45458	0.000797167	0.0394096
YIL059C	Cntrl	OM45	7.5741	1.45458	0.000797167	0.0394096
YGR228W	Cntrl	OM45	-4.08381	1.07089	0.000797167	0.0394096
URA7:YBL039C	Cntrl	OM45	-2.62797	3.09253	0.000798534	0.0394096
SNR8:snR8	Cntrl	OM45	-2.30493	8.05092	0.000807255	0.0395161
PNO1:YOR145C	Cntrl	OM45	-3.11353	1.91403	0.000851461	0.0413439
PUF6:YDR496C	Cntrl	OM45	-2.65962	2.89258	0.00087276	0.0420391
YLR154C-H	Cntrl	OM45	-2.38227	4.45666	0.00092169	0.0440436
DBP2:YNL112W	Cntrl	OM45	-2.36174	4.53276	0.0010563	0.0500785
YLR157C-B	Cntrl	OM45	7.4844	1.38053	0.00133434	0.0618005
SNR53:snR53	Cntrl	OM45	-3.99115	0.992918	0.00133434	0.0618005
YDR149C	Cntrl	OM45	-3.44522	1.05073	0.00133434	0.0618005
RRB1:YMR131C	Cntrl	OM45	-2.41985	3.39267	0.00138778	0.0637848
AGP3:YFL055W	Cntrl	OM45	2.25641	5.64462	0.00140031	0.0638732
TOD6:YBL054W	Cntrl	OM45	-3.31193	1.31409	0.00141951	0.064262
RRT15:YLR162W-A	Cntrl	OM45	-2.25081	4.90125	0.00155622	0.0699255
ARG4:YHR018C	Cntrl	OM45	2.1832	7.0336	0.00158237	0.0705737
NOP58:YOR310C	Cntrl	OM45	-2.2634	4.35761	0.00162212	0.0716156
YOL103W-A	Cntrl	OM45	2.20117	6.21775	0.00162952	0.0716156
DBP3:YGL078C	Cntrl	OM45	-2.50786	2.76501	0.00164946	0.0719668
UTP20:YBL004W	Cntrl	OM45	-2.20223	5.14425	0.00170372	0.0737994
YLL067W-A	Cntrl	OM45	7.38874	1.30204	0.00174368	0.0744588
SNR58:snR58	Cntrl	OM45	-3.3462	0.972448	0.00174368	0.0744588
NOP1:YDL014W	Cntrl	OM45	-2.28242	3.98993	0.00177017	0.0750576
SNR14:snR14	Cntrl	OM45	-2.2944	3.79877	0.00180882	0.0761602
SNR191:snR191	Cntrl	OM45	-2.128	8.01243	0.00184255	0.0769929
ARG5,6:YER069W	Cntrl	OM45	2.13568	7.8009	0.00185417	0.0769929
SNR17A:snR17a	Cntrl	OM45	-2.11608	13.0223	0.0018678	0.0770277
FHN1:YGR131W	Cntrl	OM45	6.92635	0.930285	0.00199604	0.0817564
GYP8:YFL027C	Cntrl	OM45	2.85425	2.72743	0.0020415	0.0830533
MDN1:YLR106C	Cntrl	OM45	-2.10684	7.25555	0.00211817	0.0855939
NUG1:YER006W	Cntrl	OM45	-2.3889	2.82124	0.00225458	0.09036
SNU13:YEL026W	Cntrl	OM45	-2.71231	2.0836	0.00226613	0.09036
BUD22:YMR014W	Cntrl	OM45	-2.88291	1.72143	0.00231637	0.0917556
OYE3:YPL171C	Cntrl	OM45	-2.40116	2.97085	0.00235859	0.0928175
CHA1:YCL064C	Cntrl	OM45	2.30496	3.81196	0.00253884	0.09863
BNA3:YJL060W	Cntrl	OM45	2.07223	7.26277	0.00253906	0.09863
OXA1:YER154W	Cntrl	OXA11	-10.8073	13.5786	1.14634e-27	6.98121e-24
RDN5-6	Cntrl	OXA11	-14.6099	8.28854	2.22746e-23	6.78261e-20
YLR154C-G	Cntrl	OXA11	-14.3365	8.01337	1.46828e-22	2.9806e-19
YOL103W-A	Cntrl	OXA11	12.4509	6.18686	5.98007e-16	9.10466e-13
PET122:YER153C	Cntrl	OXA11	-5.92481	8.07357	5.60191e-13	6.82313e-10
RDN5-5	Cntrl	OXA11	-10.6257	4.19768	1.31853e-11	1.00373e-08
RDN5-4	Cntrl	OXA11	-10.6257	4.19768	1.31853e-11	1.00373e-08
RDN5-3	Cntrl	OXA11	-10.6257	4.19768	1.31853e-11	1.00373e-08
YDR098C-A	Cntrl	OXA11	-5.85626	5.46425	2.95721e-11	2.00105e-08
YIL177C	Cntrl	OXA11	-10.2841	3.83194	1.20435e-10	7.33447e-08
YMR051C	Cntrl	OXA11	-7.36129	3.60902	4.34651e-10	2.40638e-07
YHR218W	Cntrl	OXA11	-9.789	3.29755	2.71466e-09	1.37769e-06
tD(GUC)N	Cntrl	OXA11	-7.01018	3.23284	3.93956e-09	1.84553e-06
SNR56:snR56	Cntrl	OXA11	-5.39299	4.09266	6.31501e-09	2.74703e-06
tS(AGA)H	Cntrl	OXA11	-9.38236	2.85717	3.22964e-08	1.31123e-05
YMR013W-A	Cntrl	OXA11	-4.3699	4.08979	1.60579e-07	6.11203e-05
SNR52:snR52	Cntrl	OXA11	-4.11184	4.93471	1.77904e-07	6.37317e-05
SNR128:snR128	Cntrl	OXA11	-3.74802	8.49528	3.098e-07	0.000104816
tP(UGG)N1	Cntrl	OXA11	-8.98876	2.43368	3.44558e-07	0.00011044
YLR154W-F	Cntrl	OXA11	-3.64232	9.92292	5.21832e-07	0.000158898
YBR012W-A	Cntrl	OXA11	-3.94234	4.57853	5.52464e-07	0.000160215
YDR261W-A	Cntrl	OXA11	-4.40598	3.31324	6.62507e-07	0.000183394
SNR6:snR6	Cntrl	OXA11	-4.59726	3.27479	7.24953e-07	0.000191955
SNR87:snR87	Cntrl	OXA11	-5.1757	2.25853	1.03208e-06	0.00026189
SNR60:snR60	Cntrl	OXA11	-3.66368	5.23854	1.44285e-06	0.000351477
tE(UUC)L	Cntrl	OXA11	-8.71805	2.14664	1.71836e-06	0.000402492
SNR18:snR18	Cntrl	OXA11	-3.74559	4.6948	1.94489e-06	0.00043868
SNR79:snR79	Cntrl	OXA11	-4.37937	3.05493	2.53232e-06	0.000550779
RDN5-1	Cntrl	OXA11	-3.31664	9.87734	3.53294e-06	0.000741917
SNR51:snR51	Cntrl	OXA11	-3.57078	4.28723	5.48489e-06	0.00111343
SNR48:snR48	Cntrl	OXA11	-3.45783	4.72089	5.90243e-06	0.0011426
YPL060C-A	Cntrl	OXA11	8.69847	2.72759	6.00382e-06	0.0011426
SNR14:snR14	Cntrl	OXA11	-3.40219	4.99208	6.44572e-06	0.00118953
YNL143C	Cntrl	OXA11	-3.49201	4.33758	6.75824e-06	0.00120224
SNR77:snR77	Cntrl	OXA11	-3.59276	3.85307	6.90942e-06	0.00120224
SNR24:snR24	Cntrl	OXA11	-3.97493	3.08609	7.25586e-06	0.00122745
SNR61:snR61	Cntrl	OXA11	-3.51787	3.78162	1.01786e-05	0.00167534
SNR41:snR41	Cntrl	OXA11	-3.18229	6.54419	1.05104e-05	0.00168442
SNR66:snR66	Cntrl	OXA11	-3.37665	3.64811	2.15675e-05	0.00336784
SNR75:snR75	Cntrl	OXA11	-3.97477	2.6563	2.49918e-05	0.0037122
SNR76:snR76	Cntrl	OXA11	-3.97477	2.6563	2.49918e-05	0.0037122
SNR68:snR68	Cntrl	OXA11	-3.074	5.54385	2.64793e-05	0.0038163
YLR154C-H	Cntrl	OXA11	8.40119	2.47138	2.69459e-05	0.0038163
SNR44:snR44	Cntrl	OXA11	-3.1683	4.58113	2.7816e-05	0.00384998
SNR64:snR64	Cntrl	OXA11	-3.359	3.79923	2.99756e-05	0.0040567
SNR13:snR13	Cntrl	OXA11	-3.03078	5.65795	3.18922e-05	0.0041865
MPH2:YDL247W	Cntrl	OXA11	8.35324	2.43033	3.23096e-05	0.0041865
SNR39:snR39	Cntrl	OXA11	-3.89475	2.57941	3.70145e-05	0.00469622
SNR39B:snR39B	Cntrl	OXA11	-3.03547	4.97834	3.80699e-05	0.00473155
YPL222C-A	Cntrl	OXA11	-8.1098	1.52524	4.53239e-05	0.00552045
SNR55:snR55	Cntrl	OXA11	-3.01417	4.70528	4.85372e-05	0.00569919
YER160C	Cntrl	OXA11	-2.86652	7.66838	4.8663e-05	0.00569919
YML039W	Cntrl	OXA11	-3.04706	4.4701	5.3066e-05	0.00609759
SNR38:snR38	Cntrl	OXA11	-3.27797	3.03208	7.08666e-05	0.00799218
SNR161:snR161	Cntrl	OXA11	-2.88453	5.00737	8.50696e-05	0.00941952
tG(GCC)D2	Cntrl	OXA11	-5.1567	1.34516	9.63608e-05	0.0104792
YDR365W-A	Cntrl	OXA11	-2.77705	6.04519	0.000102204	0.0109197
YNL284C-B	Cntrl	OXA11	-2.68484	8.68826	0.000119744	0.0125731
YER159C-A	Cntrl	OXA11	-2.85733	4.45626	0.000149659	0.0154479
SNR58:snR58	Cntrl	OXA11	-4.04789	1.73525	0.000157376	0.0157396
YNL054W-B	Cntrl	OXA11	-2.6309	8.6069	0.000158043	0.0157396
YER152W-A	Cntrl	OXA11	-3.91573	2.01293	0.000160239	0.0157396
SNR9:snR9	Cntrl	OXA11	-2.64861	6.59141	0.000170872	0.0164119
SNR40:snR40	Cntrl	OXA11	-2.70976	5.42575	0.000172474	0.0164119
SNR33:snR33	Cntrl	OXA11	-2.62188	6.79829	0.000187186	0.0175379
SNR67:snR67	Cntrl	OXA11	-2.96283	3.35397	0.000213985	0.019745
SNR80:snR80	Cntrl	OXA11	-2.72445	4.75738	0.000220429	0.020036
SNR72:snR72	Cntrl	OXA11	-3.85451	1.95692	0.000230561	0.0206488
PAD1:YDR538W	Cntrl	OXA11	7.8985	2.04499	0.000243817	0.0215195
YPR160C-A	Cntrl	OXA11	-7.67109	1.1067	0.000290613	0.0246469
tH(GUG)E2	Cntrl	OXA11	-7.67109	1.1067	0.000290613	0.0246469
SNR78:snR78	Cntrl	OXA11	-3.46689	2.18268	0.000291391	0.0246469
YNL054W-A	Cntrl	OXA11	-2.67925	4.0115	0.000359195	0.0299657
SNR190:snR190	Cntrl	OXA11	-2.45182	11.1775	0.000372858	0.0306852
OPI8:YKR035C	Cntrl	OXA11	7.79462	1.95806	0.000385253	0.0307271
YGL152C	Cntrl	OXA11	-7.56472	1.00986	0.000390825	0.0307271
SNR65:snR65	Cntrl	OXA11	-4.85857	1.08132	0.000390825	0.0307271
HSP26:YBR072W	Cntrl	OXA11	-2.53911	5.31224	0.00039355	0.0307271
SNR34:snR34	Cntrl	OXA11	-2.44479	8.70489	0.000403935	0.0311388
SNR50:snR50	Cntrl	OXA11	-2.692	3.60719	0.000449148	0.0341914
SNR62:snR62	Cntrl	OXA11	-4.74372	0.984098	0.000530405	0.0398786
YML045W	Cntrl	OXA11	-2.37312	7.99914	0.000586024	0.043523
ATP8:Q0080	Cntrl	OXA11	-3.7272	1.45513	0.000621965	0.0456358
SNR70:snR70	Cntrl	OXA11	-2.3557	8.16635	0.000639232	0.0463443
YBR012W-B	Cntrl	OXA11	-2.36838	6.45414	0.00070213	0.0503055
tL(CAA)G1	Cntrl	OXA11	-7.44987	0.907526	0.000726851	0.0508796
YBR064W	Cntrl	OXA11	-7.44987	0.907526	0.000726851	0.0508796
BEM2:YER155C	Cntrl	OXA11	-2.2821	8.65277	0.000887769	0.0614376
SNR69:snR69	Cntrl	OXA11	-2.49714	4.02522	0.000916638	0.0627227
SNR10:snR10	Cntrl	OXA11	-2.26943	7.75403	0.000983679	0.0665623
RDN5-2	Cntrl	OXA11	-7.32509	0.799033	0.00100641	0.0666199
YJL020W-A	Cntrl	OXA11	-7.32509	0.799033	0.00100641	0.0666199
SNR45:snR45	Cntrl	OXA11	-2.25066	7.95872	0.00105708	0.0692218
YGR038C-B	Cntrl	OXA11	-2.25776	7.23396	0.00107842	0.0694996
YER152C	Cntrl	OXA11	-2.27837	6.08282	0.00108415	0.0694996
YDR545C-A	Cntrl	OXA11	-2.40376	3.98595	0.0011337	0.0719188
DID2:YKR035W-A	Cntrl	OXA11	-2.94729	2.14465	0.00117645	0.0738615
SNR35:snR35	Cntrl	OXA11	-2.21674	8.23135	0.00122713	0.0762573
SNR37:snR37	Cntrl	OXA11	-2.18121	11.3457	0.00138471	0.0846189
SNR43:snR43	Cntrl	OXA11	-2.20282	6.9908	0.00140283	0.0846189
YPR137C-A	Cntrl	OXA11	-2.19399	7.69985	0.00140337	0.0846189
YGR115C	Cntrl	OXA11	-3.41993	1.57808	0.00141951	0.0847528
SNR3:snR3	Cntrl	OXA11	-2.20307	6.5015	0.00146902	0.0868579
RRT15:YLR162W-A	Cntrl	OXA11	-2.23435	5.10566	0.00168673	0.0987712
YGL152C	Cntrl	PEX14	-20.5645	14.1103	8.96301e-42	5.46834e-38
PEX14:YGL153W	Cntrl	PEX14	-11.9087	14.4861	5.48e-31	1.67167e-27
URA3:YEL021W	Cntrl	PEX14	-10.6168	4.19538	3.92866e-12	7.98959e-09
OPI8:YKR035C	Cntrl	PEX14	8.35486	2.01892	2.45054e-06	0.00373768
YER159C-A	Cntrl	PEX14	5.20977	2.05085	1.89214e-05	0.0230879
DID2:YKR035W-A	Cntrl	PEX14	-3.29883	3.10028	0.000101616	0.0996556
YDR149C	Cntrl	PEX14	-3.85928	2.28773	0.00011434	0.0996556
CYC1:YJR048W	Cntrl	SEC4	7.6597	7.84261	2.42278e-17	1.50334e-13
YLR302C	Cntrl	SEC4	10.268	3.6818	4.91875e-11	1.52604e-07
MET17:YLR303W	Cntrl	SEC4	4.99719	4.79282	2.80969e-09	5.81138e-06
YDR098C-A	Cntrl	SEC4	-4.27526	4.66542	1.66746e-07	0.000258665
SPG4:YMR107W	Cntrl	SEC4	3.79527	3.96098	3.24867e-06	0.0040316
HIS3:YOR202W	Cntrl	SEC4	2.87375	6.68855	5.21251e-05	0.0471569
YIL177C	Cntrl	SEC4	-7.72666	1.51075	5.79138e-05	0.0471569
ALD3:YMR169C	Cntrl	SEC4	2.82934	7.2215	6.07985e-05	0.0471569
YBR116C	Cntrl	SEC4	4.06363	1.95454	8.02885e-05	0.0553545
SRO7:YPR032W	Cntrl	SRO7	-9.84862	12.3491	7.74501e-25	4.66715e-21
YDR316W-B	Cntrl	SRO7	-13.7623	7.13225	1.12089e-20	3.37723e-17
MF(ALPHA)1:YPL187W	Cntrl	SRO7	-9.10966	5.08425	9.25206e-15	1.85843e-11
LEU2:YCL018W	Cntrl	SRO7	-11.08	4.35555	9.54001e-13	1.4372e-09
YLR227W-B	Cntrl	SRO7	5.76018	8.56887	1.5586e-12	1.87842e-09
STE2:YFL026W	Cntrl	SRO7	6.65632	5.75948	3.57785e-12	3.59335e-09
MET17:YLR303W	Cntrl	SRO7	-4.96461	8.77321	1.53741e-10	1.32349e-07
DAL80:YKR034W	Cntrl	SRO7	-10.0478	3.23097	8.14455e-10	5.90906e-07
STE3:YKL178C	Cntrl	SRO7	-5.60298	3.9195	8.82535e-10	5.90906e-07
INO1:YJL153C	Cntrl	SRO7	-4.91682	5.3574	1.47035e-09	8.86033e-07
YHR218W	Cntrl	SRO7	-9.7806	2.93434	4.33351e-09	2.37398e-06
RDN5-6	Cntrl	SRO7	-9.72621	2.87381	6.40436e-09	3.21606e-06
COS3:YML132W	Cntrl	SRO7	10.2027	3.79241	9.23962e-09	4.28292e-06
BAR1:YIL015W	Cntrl	SRO7	4.99822	4.89677	2.097e-08	9.02607e-06
URA1:YKL216W	Cntrl	SRO7	4.6799	5.05897	3.62934e-08	1.45803e-05
URA3:YEL021W	Cntrl	SRO7	-9.27433	2.37093	9.83586e-08	3.48652e-05
YCL020W	Cntrl	SRO7	-9.27433	2.37093	9.83586e-08	3.48652e-05
YML040W	Cntrl	SRO7	4.26884	5.41842	1.26916e-07	3.96559e-05
YJR026W	Cntrl	SRO7	4.26884	5.41842	1.26916e-07	3.96559e-05
AGA2:YGL032C	Cntrl	SRO7	9.46443	3.1332	1.31616e-07	3.96559e-05
SNR10:snR10	Cntrl	SRO7	-3.83696	8.79221	1.72473e-07	4.94914e-05
SNR85:snR85	Cntrl	SRO7	-3.81512	7.33421	2.3056e-07	6.31524e-05
SNR42:snR42	Cntrl	SRO7	-3.71624	9.78593	3.32995e-07	8.72447e-05
SNR11:snR11	Cntrl	SRO7	-3.67781	11.065	4.04238e-07	0.000100863
SNR36:snR36	Cntrl	SRO7	-3.81857	5.62819	4.1845e-07	0.000100863
YLR227W-A	Cntrl	SRO7	4.58594	4.22725	5.078e-07	0.000112904
SNR49:snR49	Cntrl	SRO7	-3.66759	7.70283	5.34326e-07	0.000112904
YHR052W-A	Cntrl	SRO7	-8.98112	2.0473	5.43348e-07	0.000112904
YHR054W-A	Cntrl	SRO7	-8.98112	2.0473	5.43348e-07	0.000112904
SNR44:snR44	Cntrl	SRO7	-3.83235	4.83154	6.25651e-07	0.000125672
YHB1:YGR234W	Cntrl	SRO7	-3.76898	5.26148	6.51188e-07	0.000126582
YNL143C	Cntrl	SRO7	-3.88187	4.3297	8.6807e-07	0.000157701
SNR43:snR43	Cntrl	SRO7	-3.58069	7.84584	8.77267e-07	0.000157701
SNR9:snR9	Cntrl	SRO7	-3.59686	7.08523	8.89784e-07	0.000157701
OYE3:YPL171C	Cntrl	SRO7	-3.86031	4.11432	1.05224e-06	0.000181165
OXA1:YER154W	Cntrl	SRO7	-3.58843	6.08563	1.28221e-06	0.000214628
YMR051C	Cntrl	SRO7	-6.12595	1.86364	1.4456e-06	0.000235438
SNR33:snR33	Cntrl	SRO7	-3.47693	7.20385	1.73883e-06	0.000275742
SNR191:snR191	Cntrl	SRO7	-3.41689	9.00373	2.01678e-06	0.000311618
YNL284C-A	Cntrl	SRO7	8.96458	2.69595	2.14312e-06	0.000322861
SNR32:snR32	Cntrl	SRO7	-3.39046	9.11869	2.34669e-06	0.000344907
SNR35:snR35	Cntrl	SRO7	-3.38041	8.88972	2.5138e-06	0.000358051
SNR80:snR80	Cntrl	SRO7	-3.53542	5.12596	2.59181e-06	0.000358051
SNR34:snR34	Cntrl	SRO7	-3.37193	9.16505	2.61438e-06	0.000358051
SNR46:snR46	Cntrl	SRO7	-3.35223	8.19534	3.09897e-06	0.000414986
SNR8:snR8	Cntrl	SRO7	-3.32618	8.81358	3.4437e-06	0.000449733
YDR098C-A	Cntrl	SRO7	-3.94195	3.13105	3.50771e-06	0.000449733
STE6:YKL209C	Cntrl	SRO7	3.48624	5.83229	3.63992e-06	0.000456961
YNL284C-B	Cntrl	SRO7	3.50162	5.62308	3.96103e-06	0.000487126
OPT2:YPR194C	Cntrl	SRO7	-3.38356	5.73574	4.32356e-06	0.000521075
SNR31:snR31	Cntrl	SRO7	-3.26908	8.1255	4.98154e-06	0.000588603
SNR161:snR161	Cntrl	SRO7	-3.39447	5.10177	5.15872e-06	0.000597816
SNR189:snR189	Cntrl	SRO7	-3.25487	8.05786	5.48498e-06	0.000623632
YPR158W-A	Cntrl	SRO7	-8.55148	1.58355	6.31674e-06	0.000692085
YOR142W-A	Cntrl	SRO7	-8.55148	1.58355	6.31674e-06	0.000692085
YGL088W	Cntrl	SRO7	-4.33171	2.31336	8.55173e-06	0.000920227
SNR81:snR81	Cntrl	SRO7	-3.33069	4.78515	8.74037e-06	0.000924026
SNR30:snR30	Cntrl	SRO7	-3.1471	13.1321	8.96271e-06	0.000931195
PDR18:YNR070W	Cntrl	SRO7	5.10676	2.93926	9.39195e-06	0.000959252
SNR128:snR128	Cntrl	SRO7	-3.15111	7.5871	1.02601e-05	0.00103046
MFA2:YNL145W	Cntrl	SRO7	4.48084	3.24697	1.1065e-05	0.00109308
YPL060C-A	Cntrl	SRO7	8.63954	2.41541	1.13841e-05	0.00110435
SNR190:snR190	Cntrl	SRO7	-3.10299	11.3884	1.15457e-05	0.00110435
SNR5:snR5	Cntrl	SRO7	-3.11922	7.23991	1.25239e-05	0.0011792
SNR83:snR83	Cntrl	SRO7	-3.05712	9.8723	1.50969e-05	0.0013996
SNR48:snR48	Cntrl	SRO7	-3.30665	4.19783	1.86153e-05	0.00169963
YLR154W-F	Cntrl	SRO7	-3.02113	8.99951	1.91927e-05	0.0017262
SNR82:snR82	Cntrl	SRO7	-2.98724	9.51743	2.27557e-05	0.00201655
SNR56:snR56	Cntrl	SRO7	-3.8484	2.11263	2.65437e-05	0.00231815
SNR45:snR45	Cntrl	SRO7	-2.96054	8.21026	2.76805e-05	0.00236362
SNR84:snR84	Cntrl	SRO7	-2.95262	9.17005	2.78489e-05	0.00236362
SAG1:YJR004C	Cntrl	SRO7	-3.07087	5.04326	2.967e-05	0.00248322
YHL034W-A	Cntrl	SRO7	3.94062	3.29237	4.14756e-05	0.00342372
YMR013W-A	Cntrl	SRO7	-3.50334	2.83628	4.31467e-05	0.00351354
PUT4:YOR348C	Cntrl	SRO7	-2.88576	6.55329	4.87704e-05	0.00391854
MEP2:YNL142W	Cntrl	SRO7	-2.88061	6.52759	4.95047e-05	0.0039252
SNR17B:snR17b	Cntrl	SRO7	-2.82433	11.2827	5.36163e-05	0.00416988
BTN2:YGR142W	Cntrl	SRO7	-2.92253	5.54692	5.39746e-05	0.00416988
AIF1:YNR074C	Cntrl	SRO7	8.29435	2.1208	5.68506e-05	0.00428227
MPH2:YDL247W	Cntrl	SRO7	8.29435	2.1208	5.68506e-05	0.00428227
SNR37:snR37	Cntrl	SRO7	-2.80037	11.5139	6.09347e-05	0.00453324
SNR18:snR18	Cntrl	SRO7	-3.08204	3.68318	6.6463e-05	0.00488422
YDR149C	Cntrl	SRO7	-4.34061	1.57234	6.91332e-05	0.00501923
SNR4:snR4	Cntrl	SRO7	-2.74981	9.46036	8.10368e-05	0.00581342
HXT17:YNR072W	Cntrl	SRO7	8.21931	2.05723	8.43945e-05	0.00598308
SNR60:snR60	Cntrl	SRO7	-2.94016	4.18743	8.7387e-05	0.00606684
BOP2:YLR267W	Cntrl	SRO7	3.01293	4.85854	8.75896e-05	0.00606684
MFA1:YDR461W	Cntrl	SRO7	4.64018	2.54041	9.86135e-05	0.00675278
SNR3:snR3	Cntrl	SRO7	-2.73947	6.59553	0.0001045	0.00702037
YCL019W	Cntrl	SRO7	-2.74868	6.18074	0.000104851	0.00702037
YLR154W-E	Cntrl	SRO7	-2.68723	12.6524	0.000110829	0.00733905
SNR17A:snR17a	Cntrl	SRO7	-2.66508	13.3542	0.000124377	0.00814672
YDR365W-A	Cntrl	SRO7	3.71354	3.09924	0.00012685	0.00821936
SNR68:snR68	Cntrl	SRO7	-2.75489	4.88672	0.00013953	0.00894473
ADY2:YCR010C	Cntrl	SRO7	3.67797	3.0692	0.000154729	0.00981469
SNR41:snR41	Cntrl	SRO7	-2.68311	5.73379	0.000164719	0.0103396
HSP30:YCR021C	Cntrl	SRO7	-2.77665	4.45518	0.000179761	0.0109425
NDJ1:YOL104C	Cntrl	SRO7	4.49052	2.41408	0.000180606	0.0109425
RDN37-2	Cntrl	SRO7	-2.59207	16.1809	0.000181588	0.0109425
RDN37-1	Cntrl	SRO7	-2.59207	16.1809	0.000181588	0.0109425
YPL257W-A	Cntrl	SRO7	2.9414	4.24967	0.000200789	0.0117471
YER137C-A	Cntrl	SRO7	2.9414	4.24967	0.000200789	0.0117471
YLR157C-A	Cntrl	SRO7	2.9414	4.24967	0.000200789	0.0117471
YPL257W-B	Cntrl	SRO7	2.58755	7.73591	0.000214951	0.0124548
SNR69:snR69	Cntrl	SRO7	-2.79355	3.90013	0.000222016	0.0127416
GAP1:YKR039W	Cntrl	SRO7	-2.5351	8.13241	0.000259643	0.0147604
CHA1:YCL064C	Cntrl	SRO7	3.07235	3.64667	0.000278479	0.0156833
SNR13:snR13	Cntrl	SRO7	-2.59624	4.9023	0.000319031	0.0178008
NQM1:YGR043C	Cntrl	SRO7	2.95837	3.72629	0.000390798	0.021605
MF(ALPHA)2:YGL089C	Cntrl	SRO7	-2.88774	2.70834	0.000422388	0.0231392
SNR70:snR70	Cntrl	SRO7	-2.43791	7.87671	0.000427837	0.0232266
AFB1:YLR040C	Cntrl	SRO7	-2.85033	2.67537	0.000518737	0.0279099
YLR154C-H	Cntrl	SRO7	4.23216	2.19792	0.000571838	0.0304947
SNR64:snR64	Cntrl	SRO7	-2.78312	2.87735	0.000605395	0.032001
FMP16:YDR070C	Cntrl	SRO7	2.83402	3.7778	0.000621674	0.0320339
OPI8:YKR035C	Cntrl	SRO7	7.73581	1.65209	0.000621965	0.0320339
JIP3:YLR331C	Cntrl	SRO7	7.73581	1.65209	0.000621965	0.0320339
UBX6:YJL048C	Cntrl	SRO7	-2.44551	4.8615	0.000659555	0.033682
MPH3:YJR160C	Cntrl	SRO7	-2.77245	2.60751	0.000711427	0.0360257
Q0297	Cntrl	SRO7	-3.95447	0.702572	0.000726851	0.0365
YMR084W	Cntrl	SRO7	-2.50692	3.60782	0.000789107	0.0392145
YLL067C	Cntrl	SRO7	7.66217	1.59112	0.000797167	0.0392145
RDN5-1	Cntrl	SRO7	-2.30388	8.63375	0.000800428	0.0392145
SNR86:snR86	Cntrl	SRO7	-2.29232	11.3673	0.000815471	0.0396293
CYB5:YNL111C	Cntrl	SRO7	-3.17201	1.91915	0.000851461	0.0410472
YML045W	Cntrl	SRO7	-2.29196	7.57215	0.000874101	0.0418042
FMP45:YDL222C	Cntrl	SRO7	2.40701	5.37776	0.000895618	0.042496
HBN1:YCL026C-B	Cntrl	SRO7	-2.64008	2.90516	0.000953685	0.0448977
MDH2:YOL126C	Cntrl	SRO7	2.37703	5.49234	0.000975597	0.0455732
ZPR1:YGR211W	Cntrl	SRO7	-2.39663	4.47002	0.00099093	0.0459334
DID2:YKR035W-A	Cntrl	SRO7	-3.11077	1.86606	0.000999618	0.0459824
YHR219W	Cntrl	SRO7	3.2476	2.71015	0.0011219	0.0512163
SSA4:YER103W	Cntrl	SRO7	-2.27254	5.66026	0.00117408	0.0531957
YML039W	Cntrl	SRO7	7.58456	1.52711	0.00133434	0.059561
GEX2:YKR106W	Cntrl	SRO7	7.58456	1.52711	0.00133434	0.059561
YFL065C	Cntrl	SRO7	-7.35484	0.4259	0.00140897	0.0619742
tH(GUG)Q	Cntrl	SRO7	-7.35484	0.4259	0.00140897	0.0619742
ZRT1:YGL255W	Cntrl	SRO7	-2.33766	3.92929	0.0015989	0.0698186
SNR39B:snR39B	Cntrl	SRO7	-2.31533	3.97071	0.00163242	0.0707696
YCL021W-A	Cntrl	SRO7	3.97472	1.98511	0.00171843	0.0734784
CAT2:YML042W	Cntrl	SRO7	2.41603	4.02179	0.00172284	0.0734784
YBR116C	Cntrl	SRO7	7.50254	1.45973	0.00174368	0.0734784
YIL059C	Cntrl	SRO7	7.45972	1.42466	0.00174368	0.0734784
SNR77:snR77	Cntrl	SRO7	-2.60366	2.55512	0.00183116	0.0766292
ACS1:YAL054C	Cntrl	SRO7	2.4716	3.74582	0.00192757	0.0801071
SNR62:snR62	Cntrl	SRO7	-4.54753	0.394386	0.00199604	0.0823847
RDN58-1	Cntrl	SRO7	-2.0954	11.485	0.00205883	0.0838278
RDN58-2	Cntrl	SRO7	-2.0954	11.485	0.00205883	0.0838278
YLR157C-B	Cntrl	SRO7	7.37005	1.35151	0.00229484	0.0928102
YLR108C	Cntrl	SRO7	-2.12996	5.24336	0.0024547	0.0985484
YAT1:YAR035W	Cntrl	SRO7	2.63122	3.08405	0.00246943	0.0985484
DBP3:YGL078C	Cntrl	SRO7	-2.43478	2.5015	0.00254577	0.0997663
YEL077W-A	Cntrl	SRO7	-3.08004	1.42887	0.00254733	0.0997663
YNL054W-B	Cntrl	SRO7	-2.05825	7.76954	0.00254962	0.0997663

## Sheet: DE_expr_sub_cntrl
	SRO7	ABP1	MYO2	ASH1	OM45	OXA11	Cntrl	EXO70	ATG8	MYO4	PEX14
VTH2:YJL222W	-1.02672	-3.01005	0.784479	-0.0773566	-0.245112	-0.109808	0	0.188883	0.297098	0.597077	0.00375213
ALD3:YMR169C	-1.647	-0.522128	-2.99432	-2.18587	-0.845369	-0.865605	0	-3.33024	-0.0597015	-2.96037	-0.0596479
DBP3:YGL078C	1.86641	2.26222	2.54446	-0.0572731	1.93417	0.878255	0	2.91292	1.58533	1.88128	0.584406
SNU13:YEL026W	0.878251	1.99583	2.36081	-0.577821	2.36996	-0.0974546	0	3.45258	1.26512	1.60161	0.66808
SAG1:YJR004C	2.79493	0.138353	0.44348	0.500642	4.37696	0.0936144	0	3.87115	0.266062	-0.851587	0.190845
HBT1:YDL223C	-1.55157	0.0871312	-1.2143	-0.838737	0.191325	0.401555	0	-2.13958	1.56408	-1.44082	0.288617
MFA1:YDR461W	-4.635	0.65828	1.07253	0.692748	-6.93249	0.331205	0	-6.93249	1.23359	0.242859	0.33189
RPS26B:YER131W	1.86895	1.83792	2.08997	-0.417682	1.21051	0.998089	0	2.71702	0.720567	2.0593	0.442742
PDC6:YGR087C	0.485279	-4.22736	-4.25919	0.516233	-4.23479	0.79418	0	-4.54628	-3.75069	-3.56664	-0.926044
PET122:YER153C	0.113135	-0.313887	-0.275515	0.208456	0.192119	5.7683	0	-0.650844	0.786399	0.725333	0.12871
AFB1:YLR040C	2.52355	1.24248	-0.172605	0.645259	3.69652	-1.18844	0	2.85039	0.0823587	0.46425	0.507259
INO1:YJL153C	4.36337	1.18366	0.675909	0.279546	1.06472	-0.276473	0	0.298166	0.567723	0.444088	0.0658108
STE3:YKL178C	4.21884	-0.690641	0.0160005	-0.102796	5.23766	-0.690641	0	4.90256	-0.0500197	0.312962	-0.318803
PEX14:YGL153W	1.05312	0.185821	1.96255	0.567856	0.470196	1.19017	0	-0.331336	1.2776	0.967665	11.7789
SPE1:YKL184W	-0.612899	-0.179541	-0.0870623	3.97533	-0.423634	-0.319605	0	0.100812	-0.112608	0.152495	-0.0927187
STR3:YGL184C	-1.05041	-3.16741	-2.02339	0.150658	-2.04656	-0.586514	0	-3.59941	-2.36535	-1.33107	-0.0445146
LIA1:YJR070C	1.39129	2.27634	2.6037	0.651949	1.53033	1.97762	0	3.13799	2.13011	2.47516	0.225061
RPA43:YOR340C	1.49351	2.61614	2.47482	1.35991	2.66571	2.00804	0	3.45882	1.21506	2.54892	1.21985
MEP2:YNL142W	2.77863	0.00719479	-0.563274	1.51575	0.832857	-0.0297265	0	-0.265608	-0.408056	0.272206	0.11551
COS3:YML132W	-4.854	0.014049	-0.344553	-0.0854937	0.21605	-0.0829024	0	-1.26627	0.259371	-1.07884	-0.661959
OYE3:YPL171C	3.39973	1.49797	1.23604	1.42729	2.0014	2.11159	0	1.78036	2.24426	1.36699	0.94079
FMP16:YDR070C	-2.8836	-0.63859	-2.3966	-0.956003	-0.653162	0.498797	0	-4.39541	-0.176237	-1.62713	0.420765
MRD1:YPR112C	0.981192	2.35679	2.39909	0.167992	2.24298	1.66552	0	2.74533	2.26484	1.88588	0.741824
ARX1:YDR101C	0.363707	1.05117	1.50278	-0.299375	0.955672	0.541358	0	2.27729	0.32241	1.10702	-0.569094
RPS8B:YER102W	1.2711	1.13025	1.69587	-0.928222	1.08575	0.310788	0	2.66755	0.653253	1.12826	-0.386707
SNC2:YOR327C	0.108851	1.73649	4.30841	0.109045	-0.167147	1.66191	0	1.7789	0.314287	1.10665	-0.418749
MPH2:YDL247W	-2.4452	-0.58483	0.936502	0.239622	0.221332	-2.4452	0	0.134707	-0.24043	-0.602017	-0.472872
RTN2:YDL204W	-1.89807	-0.966233	-2.74648	-1.301	-0.778989	-0.501465	0	-3.19695	0.173509	-2.39486	0.166251
HXT17:YNR072W	-2.48336	0.559455	0.375015	-0.183241	0.772136	0.697897	0	-0.656765	1.08904	0.433876	0.75527
MYO4:YAL029C	0.264587	0.333912	0.340844	0.236688	0.346076	0.704107	0	0.458584	0.521731	9.18483	0.119752
URA7:YBL039C	1.04495	2.59885	2.81636	-0.143025	2.06058	0.974653	0	3.54788	1.54941	2.23553	0.153623
MFA2:YNL145W	-4.57799	0.556776	1.19016	0.882956	-7.67829	0.612913	0	-7.67829	-0.556508	0.234222	0.521264
OM45:YIL136W	-0.634905	0.54198	-1.17958	-0.35184	6.85879	0.85909	0	-1.7604	1.42934	-1.06578	1.02776
NOP13:YNL175C	1.15769	1.68894	2.07713	-0.415583	0.109212	1.43629	0	2.87159	1.44292	1.31701	0.0445759
MYO2:YOR326W	0.557877	0.131649	8.19741	0.645864	0.34707	0.255188	0	0.359274	0.727912	0.842567	0.417292
RPL6B:YLR448W	1.00337	1.7672	2.25326	-0.00758277	1.47456	-0.0260484	0	3.00598	1.17696	1.95783	0.0105494
HIS4:YCL030C	-0.919492	-3.08448	-1.95941	-0.449912	-2.35447	-0.391141	0	-2.11777	-1.1819	-1.45708	0.22389
VHR2:YER064C	0.888582	0.976202	1.82428	-0.0253986	1.02981	-0.00495385	0	2.89422	0.0590196	0.879325	0.472654
RPS20:YHL015W	0.534511	0.960701	1.04728	-0.857568	0.488075	-0.342232	0	2.23494	-0.0030893	0.90991	-0.604026
RPL34B:YIL052C	1.07893	1.48361	2.06547	-0.662392	0.993043	0.480834	0	2.65417	0.33892	1.61243	0.193237
SUL1:YBR294W	-1.27465	-4.69645	-1.79516	-0.139363	-2.95554	-0.450327	0	-3.83271	-2.40553	-1.11843	-0.188748
JLP1:YLL057C	-2.09338	-2.95663	-3.27553	-0.512765	-3.31182	-0.0150724	0	-3.79459	-2.97032	-3.39767	-2.05451
AGP3:YFL055W	-1.72714	-2.78207	-2.20035	-0.0475788	-2.1978	-0.202755	0	-3.37355	-2.39301	-2.25837	-0.385353
GUA1:YMR217W	0.781336	1.99126	2.71341	-0.763435	1.79834	0.996167	0	2.66443	1.56995	2.37298	-0.134444
URA3:YEL021W	4.46068	0	0	0	0	0.557778	0	0	0	0	5.20289
URA1:YKL216W	-4.36326	0.810263	0.666938	-0.332749	0.403477	-0.525856	0	0.59858	-0.106734	0.456986	-0.798271
RPS30B:YOR182C	1.19062	1.82507	2.73462	0.727393	1.43293	1.32033	0	3.79569	2.72769	2.46539	1.36292
NQM1:YGR043C	-2.69542	-0.681156	-2.22727	-1.42058	-1.62523	0.29971	0	-3.65108	-0.22762	-2.26187	0.0259246
ERG2:YMR202W	1.38346	-0.0919934	1.12163	0.775544	0.815447	0.296749	0	2.4458	-1.91876	1.17423	-0.126947
HOM3:YER052C	-0.6253	-2.90288	-1.52201	-0.0352205	-2.01161	-0.461678	0	-1.9303	-2.19903	-0.843633	-0.130543
SEO1:YAL067C	-0.814339	-3.76141	-1.86869	0.0462162	-6.47312	-0.989983	0	-3.89926	-2.82535	-1.49506	-0.403204
YHB1:YGR234W	3.52576	0.907043	0.792637	-0.926831	0.275146	-1.44084	0	0.880411	-0.808499	1.44054	-0.386559
PHM7:YOL084W	-0.734759	-0.538039	-1.89961	-0.775614	-0.195372	0.281708	0	-2.56257	0.850808	-1.80287	0.279465
ASH1:YKL185W	-0.179698	-0.0498086	-0.292546	8.43663	0.102766	-0.736091	0	0.185865	-0.213401	-0.317478	-0.0845078
DUS3:YLR401C	0.951459	1.2539	1.76293	0.908977	1.59106	0.990422	0	2.65987	1.4976	1.48483	0.744127
VTH1:YIL173W	0.914765	1.01261	-2.37038	0.269767	0.377367	0.512671	0	-2.38757	0.919578	-2.38902	0.626232
MTR4:YJL050W	1.18553	2.0225	2.52188	0.551817	2.12381	1.46847	0	2.83391	1.56287	2.13363	0.567317
IME4:YGL192W	-0.0317927	-0.413171	-0.711689	-0.673802	-0.170969	0.491718	0	-2.58348	0.936953	0.182461	-0.308215
RPS11A:YDR025W	1.18127	1.34765	1.74278	-0.891677	1.43903	-0.337748	0	2.5768	-0.0819282	1.60483	0.212181
ALY2:YJL084C	-0.5037	-0.203346	-0.166221	0.143029	-0.304457	-0.00376944	0	2.80952	0.139214	-0.362064	0.364132
NOP14:YDL148C	1.3202	1.79322	2.71327	0.406155	2.31013	1.51505	0	2.38084	2.07039	1.78722	0.584386
RPS12:YOR369C	1.05463	1.25672	1.5384	-0.816793	0.873936	0.448245	0	2.53161	0.709711	1.70201	-0.181106
YCT1:YLL055W	-1.24663	-3.40948	-2.29913	-0.417135	-2.81453	-0.450759	0	-3.08722	-3.0481	-1.77304	-0.616538
BAR1:YIL015W	-4.19957	-0.417512	-0.261248	0.778867	-4.05183	0.0104195	0	-3.66375	-0.213477	-0.539585	-0.103143
YTM1:YOR272W	1.02769	1.17619	1.95606	0.160308	1.30553	1.05286	0	2.42068	0.958661	1.00089	-0.428386
COS2:YBR302C	0.584319	-3.90304	-1.21508	-0.378222	-3.90304	-0.981602	0	-0.315313	-3.90304	-0.127882	-0.510309
RME2	-0.850137	-1.02578	-1.11583	-0.0367096	-0.569859	-1.12887	0	-0.478685	-3.75414	-1.92917	0.354134
SRO7:YPR032W	9.52552	0.399903	0.111807	0.239719	0.165321	1.82468	0	0.28984	-0.11694	0.597303	0.172309
SUL2:YLR092W	-0.478328	-2.19939	-0.347157	0.600278	-0.612609	0.0905155	0	-1.91781	-0.472729	0.157563	0.596702
DBP2:YNL112W	0.956642	2.49757	2.79619	0.509194	2.13958	1.22569	0	3.23914	1.70715	2.2913	0.0779558
SSB1:YDL229W	1.1805	1.36747	1.99649	-0.747724	1.49947	0.542959	0	2.40026	1.59171	2.12583	0.110967
PDR18:YNR070W	-2.10586	-0.204928	0.109677	0.165076	0.160176	-0.0559134	0	-0.36562	0.202627	0.0570522	0.121488
ABP1:YCR088W	0.446077	10.3778	3.25674	0.489291	0.535457	0.799931	0	0.224804	1.39743	0.862941	0.591499
RPL7A:YGL076C	0.828798	1.17246	1.50576	-0.605212	1.1125	0.415331	0	2.55249	0.871555	1.71923	-0.00677226
RPA135:YPR010C	1.36785	1.94895	2.59726	0.164508	2.16177	1.27385	0	3.01297	1.95932	2.24002	0.671187
UTP5:YDR398W	0.893655	1.77471	2.05849	0.755462	1.47523	1.33308	0	2.86061	0.927738	1.71495	0.256387
RPL29:YFR032C-A	1.09039	1.76498	1.57332	-0.830686	1.21112	-0.472222	0	2.69132	0.216589	1.3613	0.206374
MET1:YKR069W	-0.665004	-2.74149	-1.38119	0.249748	-1.69276	-0.108358	0	-3.07213	-1.28061	-0.78798	0.0664747
ATG8:YBL078C	0.458971	0.501995	-0.505075	-0.305173	-0.799608	0.412475	0	-1.46566	10.9405	-0.66738	-0.418941
LEU2:YCL018W	5.72898	0	0	0.166073	0	0.751892	0	0.836732	1.05797	0	0
RPL15A:YLR029C	0.713258	1.52853	1.67816	-0.643536	0.644223	0.738326	0	2.88391	0.664589	1.69781	-0.0283245
OPT2:YPR194C	3.09141	-0.343111	-0.596765	0.699656	0.755961	0.577017	0	-0.35743	-0.262564	0.00130549	0.846487
NUG1:YER006W	0.988293	2.20328	2.25923	-0.360129	1.86923	0.275589	0	2.75895	1.44371	1.56741	-0.261791
RPL14A:YKL006W	1.1448	1.6575	2.08946	-0.450166	0.940366	0.398907	0	2.74543	0.963843	1.65219	0.459961
DRS1:YLL008W	1.27587	1.94336	2.72118	0.525594	2.30292	1.46139	0	2.77382	1.79107	1.51367	0.980075
SDA1:YGR245C	0.835255	1.90343	2.36199	0.427953	2.11656	0.992195	0	2.65031	1.69964	2.17387	0.507811
MF(ALPHA)1:YPL187W	7.28817	0.623551	0.799886	-0.0430029	7.10343	0.951952	0	7.78163	-0.409255	-0.409255	-0.0252053
RPL9A:YGL147C	0.0892651	0.921606	0.990695	-1.30728	0.519088	-0.323922	0	1.82442	-0.192471	0.671193	-0.403024
PUT4:YOR348C	2.76936	0.994983	-0.586603	-0.578903	0.585908	0.224417	0	-1.30926	0.447471	-0.788004	-0.13863
RPL20B:YOR312C	0.375969	1.43142	1.87092	-0.664296	0.957022	0.0272128	0	2.7079	0.102405	1.42561	0.233781
NOP1:YDL014W	1.12032	2.36871	2.74416	0.600234	2.08503	0.928345	0	3.1766	2.00267	2.62769	0.92472
ASG7:YJL170C	-2.20155	0.111389	-0.521648	0.521524	-3.55503	-0.04746	0	-2.52256	-0.636428	-1.535	-0.616592
MET22:YOL064C	0.0393037	-3.5196	-1.11267	0.166665	-1.63931	-0.780229	0	-1.27195	-2.1974	-0.427489	-0.206046
KRE33:YNL132W	1.39166	1.36496	2.08888	0.400538	1.86815	0.841081	0	2.77528	1.47522	1.88426	-0.0951074
ENP2:YGR145W	0.806645	2.39085	1.86212	0.0334154	1.36869	0.818533	0	2.70464	2.00892	0.779678	0.120135
BDS1:YOL164W	-0.798704	-4.19984	-2.27316	-0.221662	-3.58504	-0.570932	0	-3.4449	-3.1606	-1.75087	-0.620473
HSP30:YCR021C	2.59184	1.10231	0.150357	-0.125501	0.177974	0.471962	0	0.943872	0.743271	0.615793	0.262817
RPL8B:YLL045C	1.15007	1.92579	1.76455	-0.834098	1.17027	0.377202	0	2.54216	1.45899	1.79517	0.297765
GAP1:YKR039W	2.47597	0.22258	-0.738881	1.18378	0.67781	0.239146	0	-0.58405	0.108656	0.284741	0.0446566
MET17:YLR303W	4.87111	3.12125	4.74268	0.10656	4.06547	-0.0811303	0	4.31123	4.66123	4.98569	-0.200792
RPA49:YNL248C	0.745634	0.991537	1.66229	-0.611023	0.978619	0.265079	0	2.27631	0.447902	1.24989	0.293314
MET5:YJR137C	-0.0514889	-2.42917	-0.308237	0.358995	-0.96561	-0.108228	0	-1.2644	-0.714936	0.167865	0.154131
AGA2:YGL032C	-6.54175	-0.0811848	-0.829949	0.0257527	-5.26853	-0.027041	0	-5.05118	-1.15445	-1.12373	-0.727838
HCA4:YJL033W	0.832644	2.80197	2.15014	0.35721	1.83878	1.4476	0	2.79669	1.36607	1.71411	0.0973162
ECM16:YMR128W	0.834801	2.15154	2.2094	0.717251	1.88192	0.90208	0	2.32488	1.43522	1.93168	0.538662
RPM1:Q0285	0.248007	2.45505	-0.619407	-1.16983	-0.521953	1.96059	0	2.4793	0.250854	1.32703	-1.13019
SYO1:YDL063C	0.238827	1.8087	1.76699	0.741445	1.20798	0.523049	0	2.7562	1.25177	0.672009	0.236825
MET8:YBR213W	0.15319	-2.88646	-0.610491	0.683734	-1.20574	-0.272343	0	-1.47688	-0.742603	0.0715139	0.285491
ATG41:YPL250C	-1.10041	-3.08065	-1.95545	0.0941007	-1.53492	-0.984509	0	-2.6993	-1.81687	-1.42442	1.70315
RPL1B:YGL135W	0.844561	1.62542	1.46731	-0.836771	1.0588	0.145652	0	2.57747	0.802499	1.5276	-0.119114
HAS1:YMR290C	1.02919	2.05664	2.2195	0.325216	1.52951	0.960376	0	3.00274	1.56053	1.69113	0.222001
LHP1:YDL051W	0.16914	0.994458	1.85964	-0.893699	0.304928	1.55714	0	2.65898	0.954424	0.924138	-0.0160679
RPS1B:YML063W	0.543548	1.24191	1.70938	-0.679104	0.860626	0.243046	0	2.3842	0.960741	1.63388	-0.0529441
SNC1:YAL030W	0.300572	0.22195	-0.947885	0.102217	-0.141655	1.32258	0	0.511522	-0.365549	9.51613	-0.359938
CYC1:YJR048W	-0.620346	-2.03087	-0.890128	0.0682149	-1.14878	-0.0422846	0	-0.942395	-1.11121	-0.0916199	0.151088
SPG4:YMR107W	-1.70531	-0.45585	-3.14656	-2.52257	-0.837977	0.00721117	0	-2.38638	-0.405705	-2.00789	-0.451651
NSR1:YGR159C	1.02059	2.47037	2.95155	0.248432	1.85679	1.28037	0	3.58242	1.99428	1.75917	0.462148
EXO70:YJL085W	0.193484	-0.513135	0.080745	-0.211539	-0.427251	0.141466	0	10.704	-0.362794	-0.378713	-0.202496
NOP7:YGR103W	0.861442	2.87896	2.81758	-0.271488	2.53316	1.56574	0	2.74239	2.50279	2.56099	0.587122
DAL80:YKR034W	5.1957	0	0	1.21909	0	0.961253	0	0	0	0	0.917623
OXA1:YER154W	3.4395	0.787721	0.590587	0.501275	0.986075	10.6896	0	0.602906	0.438931	3.46982	0.863818
DHR2:YKL078W	1.30859	1.90766	1.21723	0.302173	1.488	0.584963	0	2.31296	0.922198	0.967906	0.317304
RRP5:YMR229C	1.16998	2.14386	3.03965	0.681022	1.95459	1.3442	0	3.15921	2.11948	2.70461	0.558411
RRT15:YLR162W-A	1.54078	2.80418	0.917554	0.752876	2.05464	1.94523	0	4.44897	1.64276	2.29315	-0.728244
VAR1:Q0140	0.520023	2.01652	-0.278667	0.353043	0.359534	0.647862	0	2.35629	0.445717	1.17157	-0.617978
STE2:YFL026W	-5.72346	-0.630664	-0.368229	0.455085	-5.72566	-0.106506	0	-5.71546	-0.902329	-0.980933	-0.23564
MF(ALPHA)2:YGL089C	2.66226	-0.32579	-1.19186	0.0114008	3.53138	-0.4203	0	4.08553	-1.46425	-1.49712	-0.390204
STE6:YKL209C	-3.12751	-0.560764	-0.159349	0.422639	-3.37923	0.101459	0	-3.61377	-0.0224169	-0.29441	-0.109467
PRM7:YDL039C	0.576042	1.11627	2.0652	0.551515	1.43136	0.638016	0	2.72636	1.81311	1.77384	0.661993
HSP26:YBR072W	1.58554	-0.678457	-0.763575	0.245704	-0.918653	2.40291	0	-1.44538	1.19988	-0.361516	0.121798
SRP40:YKR092C	1.2728	1.89189	2.6943	0.614168	1.76241	0.829759	0	3.07394	0.652881	1.75737	0.421818

## Sheet: Expr_targets_sub_cntrl
	OXA11	PEX14	ASH1	Cntrl	MYO4	ATG8	ABP1	MYO2	SRO7	OM45	EXO70
SAG1:YJR004C	0.0936144	0.190845	0.500642	0	-0.851587	0.266062	0.138353	0.44348	2.79493	4.37696	3.87115
MFA1:YDR461W	0.331205	0.33189	0.692748	0	0.242859	1.23359	0.65828	1.07253	-4.635	-6.93249	-6.93249
AFB1:YLR040C	-1.18844	0.507259	0.645259	0	0.46425	0.0823587	1.24248	-0.172605	2.52355	3.69652	2.85039
STE3:YKL178C	-0.690641	-0.318803	-0.102796	0	0.312962	-0.0500197	-0.690641	0.0160005	4.21884	5.23766	4.90256
MFA2:YNL145W	0.612913	0.521264	0.882956	0	0.234222	-0.556508	0.556776	1.19016	-4.57799	-7.67829	-7.67829
BAR1:YIL015W	0.0104195	-0.103143	0.778867	0	-0.539585	-0.213477	-0.417512	-0.261248	-4.19957	-4.05183	-3.66375
MF(ALPHA)1:YPL187W	0.951952	-0.0252053	-0.0430029	0	-0.409255	-0.409255	0.623551	0.799886	7.28817	7.10343	7.78163
ASG7:YJL170C	-0.04746	-0.616592	0.521524	0	-1.535	-0.636428	0.111389	-0.521648	-2.20155	-3.55503	-2.52256
AGA2:YGL032C	-0.027041	-0.727838	0.0257527	0	-1.12373	-1.15445	-0.0811848	-0.829949	-6.54175	-5.26853	-5.05118
STE2:YFL026W	-0.106506	-0.23564	0.455085	0	-0.980933	-0.902329	-0.630664	-0.368229	-5.72346	-5.72566	-5.71546
MF(ALPHA)2:YGL089C	-0.4203	-0.390204	0.0114008	0	-1.49712	-1.46425	-0.32579	-1.19186	2.66226	3.53138	4.08553
STE6:YKL209C	0.101459	-0.109467	0.422639	0	-0.29441	-0.0224169	-0.560764	-0.159349	-3.12751	-3.37923	-3.61377
